# Supplementary material for: A Modular Organization of the Human Intestinal Mucosal Microbiota and Its Association with Inflammatory Bowel Disease
Source: PubMed Central journal article supplement (PMC3834335; doi:10.1371/journal.pone.0080702), 2013-11-19

Table S1. Demographic information of Tong dataset.

| Metadata of Tong Dataset |         |             |             |             |
|--------------------------|---------|-------------|-------------|-------------|
|                          |         | Control     | UC          | CD          |
| Subject (64)             |         | 32          | 16          | 16          |
| Gender                   | Male    | 20          | 9           | 11          |
|                          | Female  | 12          | 7           | 5           |
| Age (Average $\pm$ SD)   |         | 60 $\pm$ 12 | 36 $\pm$ 12 | 41 $\pm$ 12 |
| Sample (179)             |         | 90          | 43          | 46          |
| Anatomical region        | CE (1)  | 1           | 0           | 0           |
|                          | AS (47) | 25          | 15          | 7           |
|                          | TR (22) | 4           | 8           | 10          |
|                          | DE (57) | 31          | 12          | 14          |
|                          | RE (52) | 29          | 8           | 15          |

Table S4. Module membership comparison between FMCs from the Tong Total and Tong Overlap dataset.

|              |                | Tong Total |            |                |           |             |
|--------------|----------------|------------|------------|----------------|-----------|-------------|
|              |                | Blue (40)  | Brown (12) | Turquoise (60) | Green (5) | Yellow (12) |
| Tong Overlap | Blue (30)      | <b>29</b>  | 1          |                |           |             |
|              | Brown (12)     | 1          | <b>11</b>  |                |           |             |
|              | Turquoise (81) | 9          |            | <b>60</b>      |           | 12          |
|              | Green (6)      | 1          |            |                | <b>5</b>  |             |

Table S5. Module membership comparison between FMCs from the Frank Total and Frank Overlap dataset.

|               |                | Frank Total    |           |         |            |           |           |
|---------------|----------------|----------------|-----------|---------|------------|-----------|-----------|
|               |                | Turquoise (52) | Blue (55) | Red (3) | Orange (7) | Black (1) | Pink (11) |
| Frank Overlap | Turquoise (59) | <b>27</b>      | 11        | 3       | 6          | 1         | 11        |
|               | Blue (70)      | 25             | <b>44</b> |         | 1          |           |           |

Table S6. Module membership comparison between FMCs from the Tong dataset and those from the Tong-MLI shared dataset.

|                  |                 | Tong Total |             |                 |           |            |
|------------------|-----------------|------------|-------------|-----------------|-----------|------------|
|                  |                 | Blue (62)  | Yellow (14) | Turquoise (137) | Green (5) | Brown (15) |
| Tong-MLI Overlap | Blue (49)       | <b>35</b>  |             |                 |           | 14         |
|                  | Yellow (18)     | 1          | <b>14</b>   | 3               |           |            |
|                  | Turquoise (161) | 26         |             | <b>134</b>      |           | 1          |
|                  | Green (5)       |            |             |                 | <b>5</b>  |            |

Figure S1

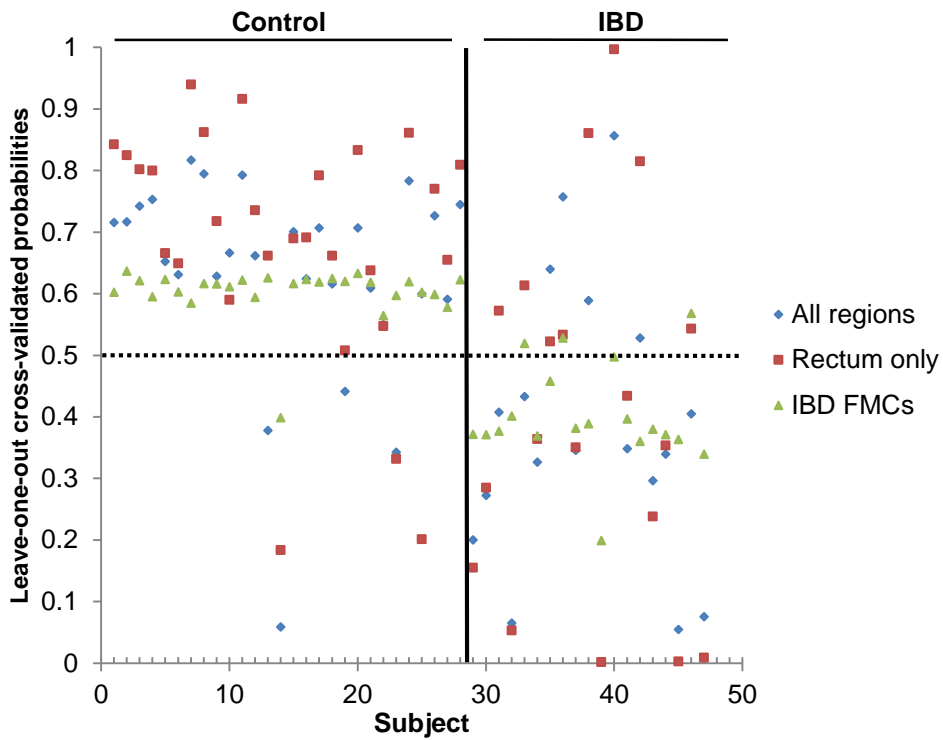

Figure S2

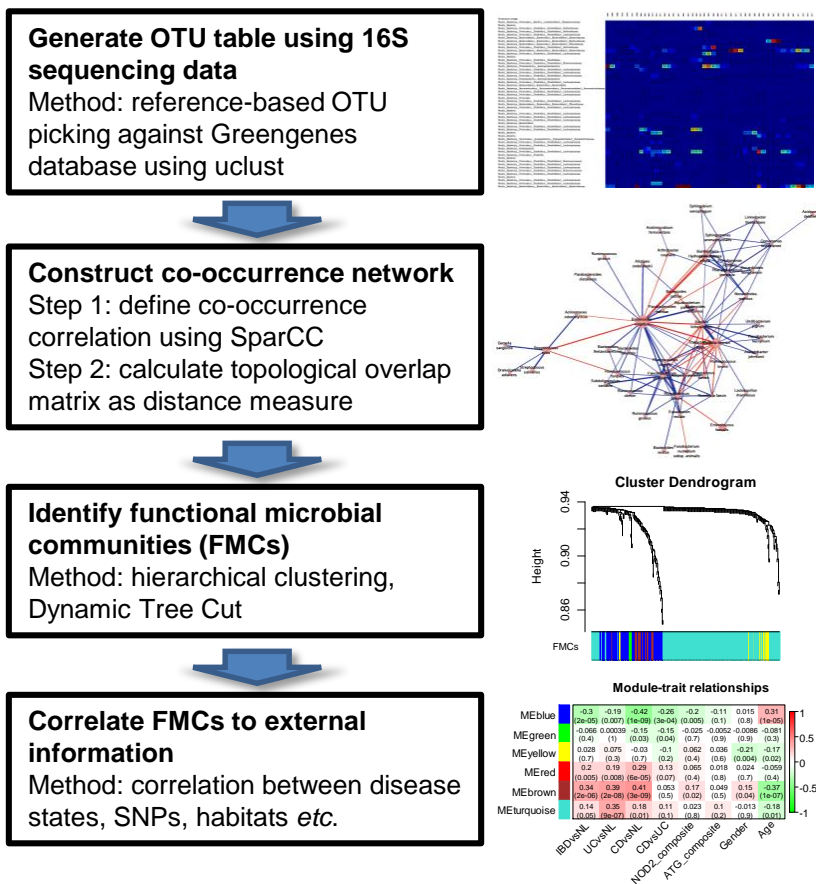

Figure S3

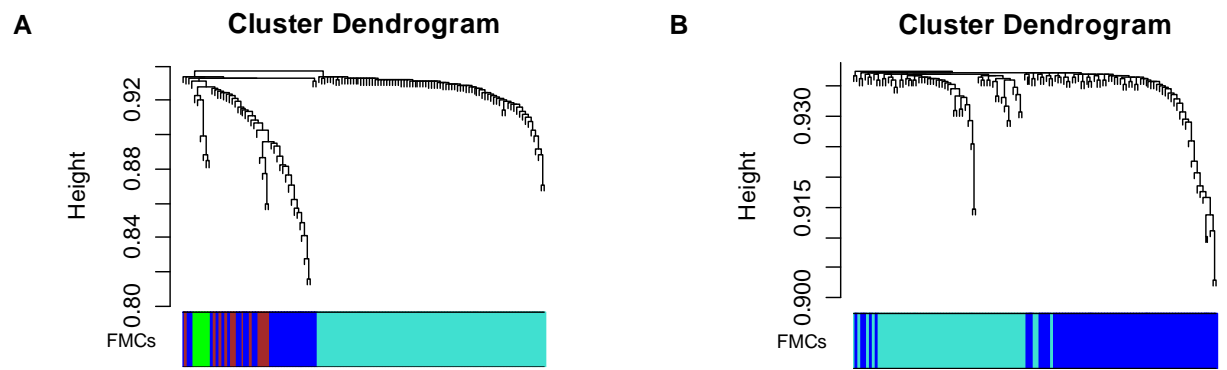

Figure S4

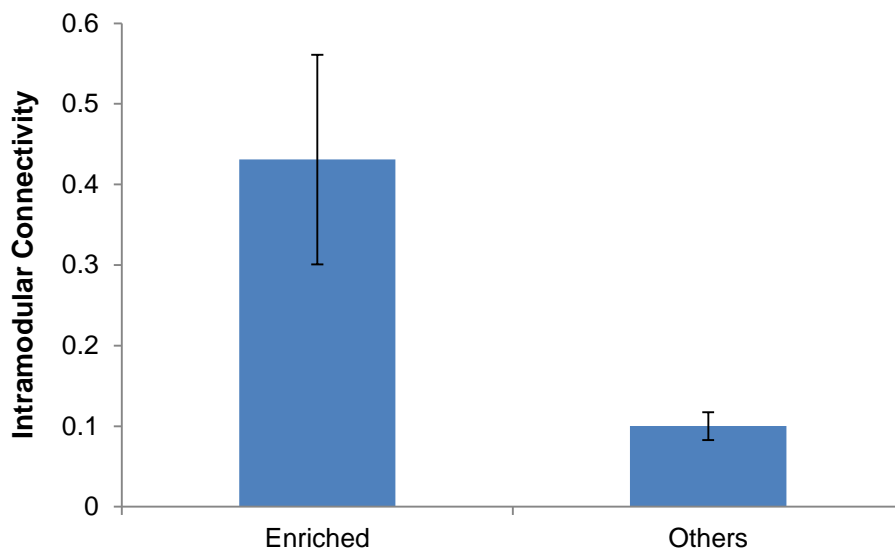

Figure S5

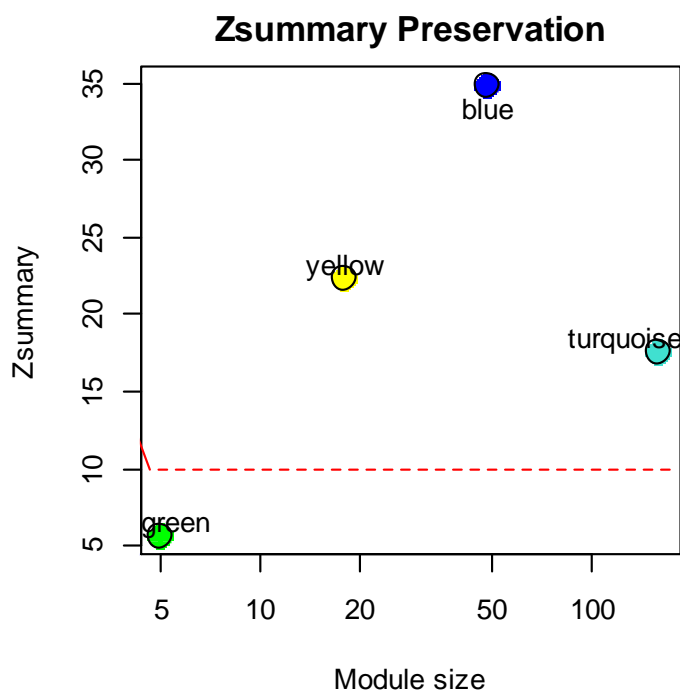

Supplement: pone.0080702.s001.pdf [file pone.0080702.s001.pdf]
