# Supplementary material for: A Modular Organization of the Human Intestinal Mucosal Microbiota and Its Association with Inflammatory Bowel Disease
Source: PLoS One. 2013 Nov 19;8(11):e80702. doi: 10.1371/journal.pone.0080702 (PMC3834335; doi:10.1371/journal.pone.0080702)
Supplement: Dataset S1 — OTU significance results between UC and control subjects. (XLSX) [file pone.0080702.s012.xlsx]

## Sheet: Phylum
Consensus Lineage	prob	Bonferroni_corrected	FDR_corrected	NM_mean	UC_mean
k__Bacteria; p__Actinobacteria	0.000504984	0.00605981	0.00605981	0.00196181	0.00488716
k__Bacteria; p__Firmicutes	0.00981253	0.11775	0.0588752	0.452886	0.382864
No blast hit; Other	0.0100485	0.120582	0.0401939	0.00103238	0.00435993
k__Bacteria; p__Synergistetes	0.0402437	0.482924	0.120731	0.000140929	0.000698294
k__Bacteria; p__Tenericutes	0.0480575	0.57669	0.115338	0.0228477	0.044272
k__Archaea; p__Euryarchaeota	0.106913	1.28295	0.213826	1.14101e-05	6.16581e-05
k__Bacteria; p__Verrucomicrobia	0.118852	1.42623	0.203747	0.0056892	0.0137362
k__Bacteria; p__TM7	0.121232	1.45478	0.181848	2.58462e-05	5.49208e-06
k__Bacteria; p__Proteobacteria	0.190682	2.28819	0.254243	0.0611307	0.0887895
k__Bacteria; p__Cyanobacteria	0.257018	3.08422	0.308422	0.00025453	4.0899e-05
k__Bacteria; p__Fusobacteria	0.524972	6.29966	0.572696	0.0068613	0.0100667
k__Bacteria; p__Bacteroidetes	0.897839	10.7741	0.897839	0.446162	0.450199

## Sheet: Class
Consensus Lineage	prob	Bonferroni_corrected	FDR_corrected	NM_mean	UC_mean
k__Bacteria; p__Actinobacteria; c__Actinobacteria	0.000504984	0.0100997	0.0100997	0.00196181	0.00488716
k__Bacteria; p__Firmicutes; c__Clostridia	0.00697243	0.139449	0.0697243	0.448124	0.374218
No blast hit; Other; Other	0.0100485	0.200969	0.0669898	0.00103238	0.00435993
k__Bacteria; p__Tenericutes; c__Mollicutes	0.0152955	0.30591	0.0764776	0.000884729	2.23343e-05
k__Bacteria; p__Proteobacteria; c__Alphaproteobacteria	0.0334662	0.669324	0.133865	0.000241248	0.0025464
k__Bacteria; p__Tenericutes; c__Erysipelotrichi	0.0389789	0.779578	0.12993	0.0218525	0.0442449
k__Bacteria; p__Synergistetes; c__Synergistia	0.0402437	0.804874	0.114982	0.000140929	0.000698294
k__Bacteria; p__Bacteroidetes; c__Flavobacteria	0.0557278	1.11456	0.13932	3.89372e-05	0
k__Archaea; p__Euryarchaeota; c__Methanobacteria	0.106913	2.13826	0.237584	1.14101e-05	6.16581e-05
k__Bacteria; p__Verrucomicrobia; c__Verrucomicrobiae	0.118852	2.37705	0.237705	0.0056892	0.0137362
k__Bacteria; p__TM7; c__TM7-3	0.121232	2.42463	0.220421	2.58462e-05	5.49208e-06
k__Bacteria; p__Firmicutes; c__Bacilli	0.13611	2.7222	0.22685	0.00476293	0.00864588
k__Bacteria; p__Proteobacteria; c__Gammaproteobacteria	0.164143	3.28285	0.252527	0.045785	0.0755736
k__Bacteria; p__Cyanobacteria; c__4C0d-2	0.178829	3.57658	0.25547	0.000252529	0
k__Bacteria; p__Proteobacteria; c__Betaproteobacteria	0.232904	4.65808	0.310539	0.00779691	0.00557777
k__Bacteria; p__Proteobacteria; c__Deltaproteobacteria	0.355925	7.1185	0.444906	0.0071619	0.0049094
k__Bacteria; p__Bacteroidetes; c__Sphingobacteria	0.443408	8.86816	0.521657	5.51248e-05	3.63279e-05
k__Bacteria; p__Fusobacteria; c__Fusobacteria	0.524972	10.4994	0.583302	0.0068613	0.0100667
k__Bacteria; p__Proteobacteria; c__Epsilonproteobacteria	0.703767	14.0753	0.740807	0.000145655	0.000182335
k__Bacteria; p__Bacteroidetes; c__Bacteroidia	0.896378	17.9276	0.896378	0.446068	0.450162

## Sheet: Order
Consensus Lineage	prob	Bonferroni_corrected	FDR_corrected	NM_mean	UC_mean
k__Bacteria; p__Firmicutes; c__Bacilli; o__Turicibacterales	0.000235831	0.00778243	0.00778243	4.45947e-06	9.33401e-05
k__Bacteria; p__Actinobacteria; c__Actinobacteria; o__Bifidobacteriales	0.000266909	0.00880801	0.00440401	0.000797158	0.00354121
k__Bacteria; p__Firmicutes; c__Clostridia; o__Clostridiales	0.00699887	0.230963	0.0769876	0.448089	0.374218
k__Bacteria; p__Firmicutes; c__Bacilli; o__Gemellales	0.00733066	0.241912	0.0604779	0.000108304	0.000479577
No blast hit; Other; Other; Other	0.0100485	0.331599	0.0663199	0.00103238	0.00435993
k__Bacteria; p__Tenericutes; c__Mollicutes; o__RF39	0.0152955	0.504752	0.0841253	0.000884729	2.23343e-05
k__Bacteria; p__Firmicutes; c__Bacilli; o__Bacillales	0.0208006	0.68642	0.09806	7.00749e-05	0.000166283
k__Bacteria; p__Tenericutes; c__Erysipelotrichi; o__Erysipelotrichales	0.0389789	1.2863	0.160788	0.0218525	0.0442449
k__Bacteria; p__Synergistetes; c__Synergistia; o__Synergistales	0.0402437	1.32804	0.14756	0.000140929	0.000698294
k__Bacteria; p__Proteobacteria; c__Alphaproteobacteria; o__	0.0420578	1.38791	0.138791	0.000185438	0.0023841
k__Bacteria; p__Proteobacteria; c__Gammaproteobacteria; o__Alteromonadales	0.0454346	1.49934	0.136304	4.45565e-05	0.000111487
k__Bacteria; p__Bacteroidetes; c__Flavobacteria; o__Flavobacteriales	0.0557278	1.83902	0.153251	3.89372e-05	0
k__Bacteria; p__Proteobacteria; c__Alphaproteobacteria; o__Rhizobiales	0.0608509	2.00808	0.154468	9.99247e-06	2.86887e-05
k__Archaea; p__Euryarchaeota; c__Methanobacteria; o__Methanobacteriales	0.106913	3.52812	0.252009	1.14101e-05	6.16581e-05
k__Bacteria; p__Proteobacteria; c__Gammaproteobacteria; o__Chromatiales	0.11664	3.84911	0.256607	7.63665e-05	0.000156886
k__Bacteria; p__Verrucomicrobia; c__Verrucomicrobiae; o__Verrucomicrobiales	0.118852	3.92213	0.245133	0.0056892	0.0137362
k__Bacteria; p__Proteobacteria; c__Gammaproteobacteria; o__Enterobacteriales	0.153811	5.07576	0.298574	0.0362828	0.0649653
k__Bacteria; p__Proteobacteria; c__Alphaproteobacteria; o__Rhodospirillales	0.177456	5.85605	0.325336	4.15011e-05	0.000105833
k__Bacteria; p__Cyanobacteria; c__4C0d-2; o__YS2	0.178829	5.90136	0.310598	0.000252529	0
k__Bacteria; p__Firmicutes; c__Bacilli; o__Lactobacillales	0.19079	6.29607	0.314804	0.00458009	0.00790668
k__Bacteria; p__Proteobacteria; c__Betaproteobacteria; o__Neisseriales	0.201517	6.65006	0.316669	0.000239456	0.000116137
k__Bacteria; p__Actinobacteria; c__Actinobacteria; o__Actinomycetales	0.222123	7.33008	0.333185	0.000271914	0.000453934
k__Bacteria; p__Proteobacteria; c__Betaproteobacteria; o__Burkholderiales	0.260462	8.59523	0.373706	0.00745737	0.00538519
k__Bacteria; p__Proteobacteria; c__Betaproteobacteria; o__	0.261303	8.62301	0.359292	7.95794e-05	3.01285e-05
k__Bacteria; p__Proteobacteria; c__Gammaproteobacteria; o__Pseudomonadales	0.310976	10.2622	0.410488	0.000175045	9.58493e-05
k__Bacteria; p__Proteobacteria; c__Deltaproteobacteria; o__Desulfovibrionales	0.326731	10.7821	0.414697	0.00714695	0.00475134
k__Bacteria; p__Bacteroidetes; c__Sphingobacteria; o__Sphingobacteriales	0.443408	14.6325	0.541943	5.51248e-05	3.63279e-05
k__Bacteria; p__Fusobacteria; c__Fusobacteria; o__Fusobacteriales	0.524972	17.3241	0.618716	0.0068613	0.0100667
k__Bacteria; p__Proteobacteria; c__Gammaproteobacteria; o__Thiotrichales	0.543057	17.9209	0.617961	1.09554e-05	1.67579e-05
k__Bacteria; p__Proteobacteria; c__Epsilonproteobacteria; o__Campylobacterales	0.703767	23.2243	0.774143	0.000145655	0.000182335
k__Bacteria; p__Proteobacteria; c__Gammaproteobacteria; o__Pasteurellales	0.79067	26.0921	0.841681	0.00917583	0.0101397
k__Bacteria; p__Bacteroidetes; c__Bacteroidia; o__Bacteroidales	0.896378	29.5805	0.92439	0.446068	0.450162
k__Bacteria; p__Actinobacteria; c__Actinobacteria; o__Coriobacteriales	0.997072	32.9034	0.997072	0.000892742	0.000892014

## Sheet: Family
Consensus Lineage	prob	Bonferroni_corrected	FDR_corrected	NM_mean	UC_mean
k__Bacteria; p__Firmicutes; c__Clostridia; o__Clostridiales; f__Veillonellaceae	8.72352e-05	0.00505964	0.00505964	0.0157926	0.0332928
k__Bacteria; p__Firmicutes; c__Bacilli; o__Turicibacterales; f__Turicibacteraceae	0.000235831	0.0136782	0.0068391	4.45947e-06	9.33401e-05
k__Bacteria; p__Actinobacteria; c__Actinobacteria; o__Bifidobacteriales; f__Bifidobacteriaceae	0.000268691	0.0155841	0.00519468	0.00078384	0.00350259
k__Bacteria; p__Firmicutes; c__Clostridia; o__Clostridiales; f__Lachnospiraceae	0.00333972	0.193704	0.048426	0.282267	0.22206
k__Bacteria; p__Firmicutes; c__Bacilli; o__Bacillales; f__Bacillaceae	0.003985	0.23113	0.046226	3.75594e-05	0.000119928
k__Bacteria; p__Proteobacteria; c__Betaproteobacteria; o__Burkholderiales; f__	0.00647155	0.37535	0.0625583	4.02434e-05	0.000198211
k__Bacteria; p__Firmicutes; c__Bacilli; o__Gemellales; f__Gemellaceae	0.00733066	0.425178	0.0607397	0.000108304	0.000479577
k__Bacteria; p__Firmicutes; c__Bacilli; o__Lactobacillales; f__Enterococcaceae	0.00869395	0.504249	0.0630311	6.2201e-05	0.000914223
No blast hit; Other; Other; Other; Other	0.0100485	0.582811	0.0647568	0.00103238	0.00435993
k__Bacteria; p__Proteobacteria; c__Gammaproteobacteria; o__Alteromonadales; f__	0.0123249	0.714843	0.0714843	3.22801e-05	0.000105691
k__Bacteria; p__Tenericutes; c__Mollicutes; o__RF39; f__	0.0152955	0.88714	0.0806491	0.000884729	2.23343e-05
k__Bacteria; p__Firmicutes; c__Bacilli; o__Lactobacillales; f__Lactobacillaceae	0.0313613	1.81896	0.15158	6.47025e-05	0.000194148
k__Bacteria; p__Tenericutes; c__Erysipelotrichi; o__Erysipelotrichales; f__Erysipelotrichaceae	0.039121	2.26902	0.17454	0.0218281	0.0442013
k__Bacteria; p__Synergistetes; c__Synergistia; o__Synergistales; f__Synergistaceae	0.0402437	2.33413	0.166724	0.000140929	0.000698294
k__Bacteria; p__Proteobacteria; c__Alphaproteobacteria; o__; f__	0.0420578	2.43935	0.162624	0.000185438	0.0023841
k__Bacteria; p__Firmicutes; c__Clostridia; o__Clostridiales; f__Eubacteriaceae	0.0429531	2.49128	0.155705	9.40916e-05	0.000278113
k__Bacteria; p__Actinobacteria; c__Actinobacteria; o__Bifidobacteriales; f__	0.0445656	2.58481	0.152047	1.33174e-05	3.86276e-05
k__Bacteria; p__Firmicutes; c__Clostridia; o__Clostridiales; f__	0.0498097	2.88896	0.160498	0.0111958	0.00682162
k__Bacteria; p__Proteobacteria; c__Gammaproteobacteria; o__Pseudomonadales; f__Pseudomonadaceae	0.0539628	3.12984	0.164729	0.000133701	7.02539e-06
k__Bacteria; p__Firmicutes; c__Clostridia; o__Clostridiales; f__ClostridialesFamilyXIII.IncertaeSedis	0.0555277	3.2206	0.16103	0.000624489	0.000127758
k__Bacteria; p__Actinobacteria; c__Actinobacteria; o__Actinomycetales; f__Actinomycetaceae	0.0663305	3.84717	0.183199	0.000105459	0.000221529
k__Bacteria; p__Bacteroidetes; c__Bacteroidia; o__Bacteroidales; f__Rikenellaceae	0.0756762	4.38922	0.19951	0.013416	0.0227215
k__Bacteria; p__Firmicutes; c__Clostridia; o__Clostridiales; f__Ruminococcaceae	0.106783	6.19339	0.269278	0.126011	0.104704
k__Archaea; p__Euryarchaeota; c__Methanobacteria; o__Methanobacteriales; f__Methanobacteriaceae	0.106913	6.20095	0.258373	1.14101e-05	6.16581e-05
k__Bacteria; p__Verrucomicrobia; c__Verrucomicrobiae; o__Verrucomicrobiales; f__Verrucomicrobiaceae	0.118852	6.89344	0.275738	0.0056892	0.0137362
k__Bacteria; p__Proteobacteria; c__Gammaproteobacteria; o__Chromatiales; f__	0.12334	7.1537	0.275142	7.07135e-05	0.000148697
k__Bacteria; p__Firmicutes; c__Clostridia; o__Clostridiales; f__Peptostreptococcaceae	0.12542	7.27438	0.269422	7.66982e-05	0.000270582
k__Bacteria; p__Bacteroidetes; c__Sphingobacteria; o__Sphingobacteriales; f__Sphingobacteriaceae	0.129376	7.50382	0.267994	4.80256e-05	1.3494e-05
k__Bacteria; p__Proteobacteria; c__Gammaproteobacteria; o__Enterobacteriales; f__Enterobacteriaceae	0.153811	8.92103	0.307622	0.0362828	0.0649653
k__Bacteria; p__Firmicutes; c__Clostridia; o__Clostridiales; f__Peptococcaceae	0.169601	9.83684	0.327895	0.000948085	0.000269717
k__Bacteria; p__Proteobacteria; c__Alphaproteobacteria; o__Rhodospirillales; f__Acetobacteraceae	0.177456	10.2925	0.332015	4.15011e-05	0.000105833
k__Bacteria; p__Cyanobacteria; c__4C0d-2; o__YS2; f__	0.178829	10.3721	0.324128	0.000252529	0
k__Bacteria; p__Proteobacteria; c__Betaproteobacteria; o__Burkholderiales; f__Burkholderiaceae	0.191794	11.124	0.337092	3.07106e-05	7.24845e-05
k__Bacteria; p__Proteobacteria; c__Betaproteobacteria; o__Neisseriales; f__Neisseriaceae	0.201517	11.688	0.343764	0.000239456	0.000116137
k__Bacteria; p__Actinobacteria; c__Actinobacteria; o__Coriobacteriales; f__	0.234381	13.5941	0.388403	8.30998e-05	4.40586e-05
k__Bacteria; p__Proteobacteria; c__Gammaproteobacteria; o__Pseudomonadales; f__Moraxellaceae	0.247799	14.3723	0.399231	4.13435e-05	8.88239e-05
k__Bacteria; p__Proteobacteria; c__Betaproteobacteria; o__; f__	0.261303	15.1556	0.409611	7.95794e-05	3.01285e-05
k__Bacteria; p__Firmicutes; c__Clostridia; o__Clostridiales; f__Clostridiaceae	0.281609	16.3333	0.429824	0.00944883	0.004764
k__Bacteria; p__Firmicutes; c__Bacilli; o__Lactobacillales; f__Streptococcaceae	0.282253	16.3707	0.41976	0.00403658	0.0064161
k__Bacteria; p__Bacteroidetes; c__Bacteroidia; o__Bacteroidales; f__Porphyromonadaceae	0.294106	17.0581	0.426453	0.0252673	0.0316093
k__Bacteria; p__Firmicutes; c__Clostridia; o__Clostridiales; f__ClostridialesFamilyXI.IncertaeSedis	0.298166	17.2936	0.421796	0.000345711	0.000136375
k__Bacteria; p__Proteobacteria; c__Deltaproteobacteria; o__Desulfovibrionales; f__Desulfovibrionaceae	0.327483	18.994	0.452238	0.00714251	0.00475134
k__Bacteria; p__Proteobacteria; c__Betaproteobacteria; o__Burkholderiales; f__Alcaligenaceae	0.329477	19.1096	0.44441	0.00650971	0.0047834
k__Bacteria; p__Bacteroidetes; c__Bacteroidia; o__Bacteroidales; f__	0.403541	23.4054	0.531941	0.0219811	0.0278844
k__Bacteria; p__Firmicutes; c__Clostridia; o__Clostridiales; f__Dehalobacteriaceae	0.425959	24.7056	0.549013	2.11988e-05	1.06815e-05
k__Bacteria; p__Proteobacteria; c__Betaproteobacteria; o__Burkholderiales; f__Oxalobacteraceae	0.440549	25.5519	0.555475	0.000347202	0.000196771
k__Bacteria; p__Proteobacteria; c__Betaproteobacteria; o__Burkholderiales; f__Comamonadaceae	0.44309	25.6992	0.546792	0.000529502	0.00013433
k__Bacteria; p__Bacteroidetes; c__Bacteroidia; o__Bacteroidales; f__Bacteroidaceae	0.521712	30.2593	0.630402	0.377232	0.356997
k__Bacteria; p__Fusobacteria; c__Fusobacteria; o__Fusobacteriales; f__Fusobacteriaceae	0.524972	30.4484	0.621395	0.0068613	0.0100667
k__Bacteria; p__Proteobacteria; c__Gammaproteobacteria; o__Thiotrichales; f__Piscirickettsiaceae	0.543057	31.4973	0.629946	1.09554e-05	1.67579e-05
k__Bacteria; p__Firmicutes; c__Bacilli; o__Bacillales; f__Staphylococcaceae	0.593396	34.417	0.674843	2.92958e-05	4.63556e-05
k__Bacteria; p__Bacteroidetes; c__Bacteroidia; o__Bacteroidales; f__Prevotellaceae	0.634679	36.8114	0.707911	0.00816853	0.0109504
k__Bacteria; p__Proteobacteria; c__Epsilonproteobacteria; o__Campylobacterales; f__Campylobacteraceae	0.666861	38.6779	0.729772	0.00014079	0.000182335
k__Bacteria; p__Actinobacteria; c__Actinobacteria; o__Actinomycetales; f__Micrococcaceae	0.71566	41.5083	0.768671	0.000164118	0.000206031
k__Bacteria; p__Firmicutes; c__Clostridia; o__Clostridiales; f__Catabacteriaceae	0.724479	42.0198	0.763996	0.00122099	0.00147968
k__Bacteria; p__Proteobacteria; c__Gammaproteobacteria; o__Pasteurellales; f__Pasteurellaceae	0.79067	45.8588	0.818908	0.00917583	0.0101397
k__Bacteria; p__Actinobacteria; c__Actinobacteria; o__Coriobacteriales; f__Coriobacteriaceae	0.842269	48.8516	0.857046	0.000809642	0.000847955
k__Bacteria; p__Firmicutes; c__Bacilli; o__Lactobacillales; f__Carnobacteriaceae	0.919496	53.3308	0.919496	0.000404782	0.000369801

## Sheet: Genus
Consensus Lineage	prob	Bonferroni_corrected	FDR_corrected	NM_mean	UC_mean
k__Bacteria; p__Actinobacteria; c__Actinobacteria; o__Bifidobacteriales; f__Bifidobacteriaceae; g__Bifidobacterium	0.000316816	0.0380179	0.0380179	0.000782513	0.0034723
k__Bacteria; p__Firmicutes; c__Bacilli; o__Turicibacterales; f__Turicibacteraceae; g__Turicibacter	0.000485764	0.0582916	0.0291458	4.45947e-06	8.14072e-05
k__Bacteria; p__Proteobacteria; c__Betaproteobacteria; o__Burkholderiales; f__; g__	0.000694015	0.0832818	0.0277606	8.13358e-06	0.000188004
k__Bacteria; p__Firmicutes; c__Clostridia; o__Clostridiales; f__Ruminococcaceae; g__Anaerotruncus	0.00156797	0.188156	0.0470391	0.00010654	0.00034593
k__Bacteria; p__Proteobacteria; c__Epsilonproteobacteria; o__Campylobacterales; f__Campylobacteraceae; g__Campylobacter	0.00190254	0.228305	0.045661	3.50345e-05	0.000182335
k__Bacteria; p__Firmicutes; c__Clostridia; o__Clostridiales; f__Lachnospiraceae; g__Oribacterium	0.00210921	0.253106	0.0421843	0.000351106	0.000906113
k__Bacteria; p__Firmicutes; c__Bacilli; o__Bacillales; f__Bacillaceae; g__Bacillus	0.00252671	0.303205	0.043315	2.86407e-05	0.000112246
k__Bacteria; p__Firmicutes; c__Clostridia; o__Clostridiales; f__Lachnospiraceae; g__Ruminococcus	0.00254721	0.305665	0.0382081	0.102579	0.0545397
k__Bacteria; p__Firmicutes; c__Clostridia; o__Clostridiales; f__Veillonellaceae; g__Dialister	0.00415938	0.499126	0.0554584	0.00487821	0.0117302
k__Bacteria; p__Firmicutes; c__Bacilli; o__Gemellales; f__Gemellaceae; g__Gemella	0.00733066	0.879679	0.0879679	0.000108304	0.000479577
k__Bacteria; p__Firmicutes; c__Clostridia; o__Clostridiales; f__Veillonellaceae; g__Veillonella	0.0086306	1.03567	0.094152	0.00282213	0.00885425
k__Bacteria; p__Firmicutes; c__Bacilli; o__Lactobacillales; f__Enterococcaceae; g__Enterococcus	0.00961278	1.15353	0.0961278	4.89105e-05	0.000682959
No blast hit; Other; Other; Other; Other; Other	0.0100485	1.20582	0.092755	0.00103238	0.00435993
k__Bacteria; p__Tenericutes; c__Erysipelotrichi; o__Erysipelotrichales; f__Erysipelotrichaceae; g__	0.0102733	1.2328	0.088057	0.00729311	0.0325064
k__Bacteria; p__Firmicutes; c__Bacilli; o__Lactobacillales; f__Enterococcaceae; g__Vagococcus	0.0109151	1.30981	0.0873208	1.32905e-05	0.000211771
k__Bacteria; p__Proteobacteria; c__Gammaproteobacteria; o__Alteromonadales; f__; g__Alkalimonas	0.0123249	1.47899	0.0924366	3.22801e-05	0.000105691
k__Bacteria; p__Tenericutes; c__Erysipelotrichi; o__Erysipelotrichales; f__Erysipelotrichaceae; g__Coprobacillus	0.0138056	1.65668	0.0974515	6.50717e-05	0.000465147
k__Bacteria; p__Tenericutes; c__Mollicutes; o__RF39; f__; g__	0.0152955	1.83546	0.10197	0.000884729	2.23343e-05
k__Bacteria; p__Proteobacteria; c__Betaproteobacteria; o__Neisseriales; f__Neisseriaceae; g__Eikenella	0.0221862	2.66234	0.140123	8.93772e-05	8.92008e-06
k__Bacteria; p__Firmicutes; c__Bacilli; o__Lactobacillales; f__Lactobacillaceae; g__Lactobacillus	0.0313613	3.76336	0.188168	6.47025e-05	0.000194148
k__Bacteria; p__Actinobacteria; c__Actinobacteria; o__Coriobacteriales; f__Coriobacteriaceae; g__Slackia	0.0347704	4.17245	0.198688	1.70442e-05	0.000129334
k__Bacteria; p__Proteobacteria; c__Alphaproteobacteria; o__; f__; g__	0.0420578	5.04694	0.229406	0.000185438	0.0023841
k__Bacteria; p__Firmicutes; c__Clostridia; o__Clostridiales; f__Ruminococcaceae; g__	0.0431202	5.17443	0.224975	0.0354261	0.0243048
k__Bacteria; p__Actinobacteria; c__Actinobacteria; o__Bifidobacteriales; f__; g__	0.0445656	5.34788	0.222828	1.33174e-05	3.86276e-05
k__Bacteria; p__Firmicutes; c__Clostridia; o__Clostridiales; f__Eubacteriaceae; g__Eubacterium	0.0470222	5.64266	0.225706	7.74077e-05	0.000253743
k__Bacteria; p__Firmicutes; c__Clostridia; o__Clostridiales; f__Lachnospiraceae; g__Anaerostipes	0.0474384	5.6926	0.218946	0.000142826	0.000371589
k__Bacteria; p__Synergistetes; c__Synergistia; o__Synergistales; f__Synergistaceae; g__Cloacibacillus	0.0494695	5.93634	0.219864	9.9131e-05	0.000630358
k__Bacteria; p__Firmicutes; c__Clostridia; o__Clostridiales; f__; g__	0.0498097	5.97717	0.21347	0.0111958	0.00682162
k__Bacteria; p__Proteobacteria; c__Gammaproteobacteria; o__Pseudomonadales; f__Pseudomonadaceae; g__Pseudomonas	0.0539628	6.47554	0.223294	0.000133701	7.02539e-06
k__Bacteria; p__Firmicutes; c__Clostridia; o__Clostridiales; f__ClostridialesFamilyXIII.IncertaeSedis; g__	0.0571089	6.85307	0.228436	0.000598201	0.000104123
k__Bacteria; p__Proteobacteria; c__Gammaproteobacteria; o__Enterobacteriales; f__Enterobacteriaceae; g__Plesiomonas	0.0619781	7.43737	0.239915	4.19698e-05	9.44466e-05
k__Bacteria; p__Bacteroidetes; c__Bacteroidia; o__Bacteroidales; f__Rikenellaceae; g__Alistipes	0.0739561	8.87473	0.277335	0.0132427	0.0225621
k__Bacteria; p__Proteobacteria; c__Gammaproteobacteria; o__Enterobacteriales; f__Enterobacteriaceae; g__Rahnella	0.0748996	8.98796	0.272362	0.0023186	0.00516689
k__Bacteria; p__Firmicutes; c__Clostridia; o__Clostridiales; f__Lachnospiraceae; g__Blautia	0.0788325	9.4599	0.278232	0.0132385	0.0091591
k__Bacteria; p__Actinobacteria; c__Actinobacteria; o__Actinomycetales; f__Actinomycetaceae; g__Actinomyces	0.0796506	9.55807	0.273088	0.00010245	0.000211626
k__Bacteria; p__Tenericutes; c__Erysipelotrichi; o__Erysipelotrichales; f__Erysipelotrichaceae; g__Holdemania	0.0836054	10.0327	0.278685	0.000459778	0.000762341
k__Bacteria; p__Proteobacteria; c__Gammaproteobacteria; o__Enterobacteriales; f__Enterobacteriaceae; g__Serratia	0.0877866	10.5344	0.284713	0.000466145	0.000998851
k__Archaea; p__Euryarchaeota; c__Methanobacteria; o__Methanobacteriales; f__Methanobacteriaceae; g__Methanobrevibacter	0.091839	11.0207	0.290018	9.41533e-06	6.16581e-05
k__Bacteria; p__Firmicutes; c__Clostridia; o__Clostridiales; f__Lachnospiraceae; g__Eubacterium	0.0985302	11.8236	0.30317	0.00193248	0.00093222
k__Bacteria; p__Firmicutes; c__Clostridia; o__Clostridiales; f__Lachnospiraceae; g__Lachnospira	0.11335	13.602	0.340049	0.00418964	0.00234855
k__Bacteria; p__Bacteroidetes; c__Bacteroidia; o__Bacteroidales; f__Porphyromonadaceae; g__Odoribacter	0.118049	14.1659	0.34551	0.00117334	0.00185794
k__Bacteria; p__Verrucomicrobia; c__Verrucomicrobiae; o__Verrucomicrobiales; f__Verrucomicrobiaceae; g__Akkermansia	0.118549	14.2259	0.338712	0.00567519	0.0137143
k__Bacteria; p__Proteobacteria; c__Deltaproteobacteria; o__Desulfovibrionales; f__Desulfovibrionaceae; g__Desulfovibrio	0.122883	14.7459	0.342928	0.0030257	0.000330287
k__Bacteria; p__Proteobacteria; c__Gammaproteobacteria; o__Chromatiales; f__; g__	0.12334	14.8008	0.336381	7.07135e-05	0.000148697
k__Bacteria; p__Firmicutes; c__Clostridia; o__Clostridiales; f__Peptostreptococcaceae; g__Peptostreptococcus	0.12542	15.0505	0.334454	7.66982e-05	0.000270582
k__Bacteria; p__Proteobacteria; c__Gammaproteobacteria; o__Enterobacteriales; f__Enterobacteriaceae; g__Escherichia	0.139167	16.7	0.363044	7.60155e-05	0.000168099
k__Bacteria; p__Bacteroidetes; c__Sphingobacteria; o__Sphingobacteriales; f__Sphingobacteriaceae; g__Sphingobacterium	0.15579	18.6947	0.397761	4.07608e-05	9.42939e-06
k__Bacteria; p__Proteobacteria; c__Gammaproteobacteria; o__Enterobacteriales; f__Enterobacteriaceae; g__	0.163627	19.6352	0.409068	0.0329679	0.0581638
k__Bacteria; p__Proteobacteria; c__Gammaproteobacteria; o__Enterobacteriales; f__Enterobacteriaceae; g__Pantoea	0.169255	20.3106	0.414502	8.35922e-05	0.000161715
k__Bacteria; p__Firmicutes; c__Clostridia; o__Clostridiales; f__Ruminococcaceae; g__Ruminococcus	0.175387	21.0465	0.420929	0.00280253	0.00470886
k__Bacteria; p__Proteobacteria; c__Alphaproteobacteria; o__Rhodospirillales; f__Acetobacteraceae; g__	0.177456	21.2947	0.417544	4.15011e-05	0.000105833
k__Bacteria; p__Cyanobacteria; c__4C0d-2; o__YS2; f__; g__	0.178829	21.4595	0.412683	0.000252529	0
k__Bacteria; p__Firmicutes; c__Clostridia; o__Clostridiales; f__Peptococcaceae; g__Peptococcus	0.189063	22.6875	0.428066	0.00023566	5.07492e-06
k__Bacteria; p__Proteobacteria; c__Betaproteobacteria; o__Burkholderiales; f__Comamonadaceae; g__Ramlibacter	0.189531	22.7437	0.42118	9.89438e-06	2.30955e-05
k__Bacteria; p__Proteobacteria; c__Betaproteobacteria; o__Burkholderiales; f__Oxalobacteraceae; g__	0.195	23.4	0.425455	0.00011529	0.000182234
k__Bacteria; p__Firmicutes; c__Clostridia; o__Clostridiales; f__Ruminococcaceae; g__Oscillospira	0.208363	25.0036	0.446492	0.00516976	0.00705948
k__Bacteria; p__Firmicutes; c__Clostridia; o__Clostridiales; f__Lachnospiraceae; g__Coprococcus	0.217088	26.0505	0.457027	0.00888937	0.00594933
k__Bacteria; p__Firmicutes; c__Clostridia; o__Clostridiales; f__Veillonellaceae; g__Acidaminococcus	0.223785	26.8542	0.463004	0.00117454	0.00224286
k__Bacteria; p__Actinobacteria; c__Actinobacteria; o__Coriobacteriales; f__; g__	0.234381	28.1257	0.476707	8.30998e-05	4.40586e-05
k__Bacteria; p__Firmicutes; c__Clostridia; o__Clostridiales; f__Clostridiaceae; g__	0.242355	29.0826	0.48471	0.0038162	0.000225292
k__Bacteria; p__Firmicutes; c__Clostridia; o__Clostridiales; f__Lachnospiraceae; g__Butyrivibrio	0.244105	29.2926	0.480207	6.03014e-05	3.63347e-05
k__Bacteria; p__Proteobacteria; c__Gammaproteobacteria; o__Pseudomonadales; f__Moraxellaceae; g__Acinetobacter	0.247799	29.7358	0.47961	4.13435e-05	8.88239e-05
k__Bacteria; p__Firmicutes; c__Clostridia; o__Clostridiales; f__Ruminococcaceae; g__Faecalibacterium	0.254218	30.5061	0.484224	0.0720851	0.059555
k__Bacteria; p__Firmicutes; c__Clostridia; o__Clostridiales; f__Veillonellaceae; g__Phascolarctobacterium	0.256838	30.8206	0.481572	0.00503012	0.00775732
k__Bacteria; p__Proteobacteria; c__Betaproteobacteria; o__; f__; g__	0.261303	31.3564	0.482406	7.95794e-05	3.01285e-05
k__Bacteria; p__Fusobacteria; c__Fusobacteria; o__Fusobacteriales; f__Fusobacteriaceae; g__Leptotrichia	0.264379	31.7255	0.480689	0.000117726	3.92985e-05
k__Bacteria; p__Firmicutes; c__Clostridia; o__Clostridiales; f__Ruminococcaceae; g__Clostridium	0.277135	33.2561	0.49636	0.00966835	0.00808452
k__Bacteria; p__Firmicutes; c__Bacilli; o__Lactobacillales; f__Streptococcaceae; g__Streptococcus	0.27823	33.3876	0.490994	0.00401697	0.0064161
k__Bacteria; p__Firmicutes; c__Clostridia; o__Clostridiales; f__Lachnospiraceae; g__Lachnobacterium	0.289912	34.7895	0.504196	0.00129656	0.000982373
k__Bacteria; p__Actinobacteria; c__Actinobacteria; o__Coriobacteriales; f__Coriobacteriaceae; g__Atopobium	0.298111	35.7733	0.511047	3.15358e-05	5.22475e-05
k__Bacteria; p__Tenericutes; c__Erysipelotrichi; o__Erysipelotrichales; f__Erysipelotrichaceae; g__Allobaculum	0.315843	37.9011	0.533819	3.41027e-05	8.54446e-06
k__Bacteria; p__Proteobacteria; c__Betaproteobacteria; o__Burkholderiales; f__Alcaligenaceae; g__Sutterella	0.331084	39.7301	0.551807	0.00414632	0.00255455
k__Bacteria; p__Bacteroidetes; c__Bacteroidia; o__Bacteroidales; f__Porphyromonadaceae; g__Parabacteroides	0.336712	40.4054	0.553499	0.0232646	0.0289089
k__Bacteria; p__Firmicutes; c__Clostridia; o__Clostridiales; f__Peptococcaceae; g__	0.348601	41.8321	0.565298	0.000704042	0.000264642
k__Bacteria; p__Proteobacteria; c__Deltaproteobacteria; o__Desulfovibrionales; f__Desulfovibrionaceae; g__LE30	0.357399	42.8879	0.571839	6.3088e-05	0.00013451
k__Bacteria; p__Firmicutes; c__Clostridia; o__Clostridiales; f__Ruminococcaceae; g__Bacteroides	0.369003	44.2804	0.582636	4.74343e-05	2.71038e-05
k__Bacteria; p__Tenericutes; c__Erysipelotrichi; o__Erysipelotrichales; f__Erysipelotrichaceae; g__Clostridium	0.392327	47.0793	0.611419	0.0126334	0.00956588
k__Bacteria; p__Bacteroidetes; c__Bacteroidia; o__Bacteroidales; f__Porphyromonadaceae; g__	0.397687	47.7225	0.611826	0.000570252	0.000798664
k__Bacteria; p__Bacteroidetes; c__Bacteroidia; o__Bacteroidales; f__; g__	0.403541	48.425	0.612974	0.0219811	0.0278844
k__Bacteria; p__Firmicutes; c__Clostridia; o__Clostridiales; f__Dehalobacteriaceae; g__Dehalobacterium	0.425959	51.115	0.638938	2.11988e-05	1.06815e-05
k__Bacteria; p__Proteobacteria; c__Betaproteobacteria; o__Burkholderiales; f__Comamonadaceae; g__Hylemonella	0.438235	52.5882	0.649236	0.000466424	7.44383e-05
k__Bacteria; p__Proteobacteria; c__Betaproteobacteria; o__Burkholderiales; f__Burkholderiaceae; g__Burkholderia	0.470896	56.5076	0.689116	2.41183e-05	1.25924e-05
k__Bacteria; p__Synergistetes; c__Synergistia; o__Synergistales; f__Synergistaceae; g__Synergistes	0.475664	57.0796	0.687707	4.17976e-05	6.79363e-05
k__Bacteria; p__Firmicutes; c__Clostridia; o__Clostridiales; f__Eubacteriaceae; g__Anaerofustis	0.504739	60.5687	0.721056	1.66839e-05	2.43704e-05
k__Bacteria; p__Proteobacteria; c__Gammaproteobacteria; o__Enterobacteriales; f__Enterobacteriaceae; g__Cronobacter	0.506257	60.7508	0.714715	3.1025e-05	4.59221e-05
k__Bacteria; p__Firmicutes; c__Clostridia; o__Clostridiales; f__Lachnospiraceae; g__Clostridium	0.520218	62.4261	0.725885	0.0511383	0.046224
k__Bacteria; p__Bacteroidetes; c__Bacteroidia; o__Bacteroidales; f__Bacteroidaceae; g__Bacteroides	0.521712	62.6054	0.719602	0.377232	0.356997
k__Bacteria; p__Fusobacteria; c__Fusobacteria; o__Fusobacteriales; f__Fusobacteriaceae; g__Fusobacterium	0.525005	63.0006	0.715916	0.00672504	0.00990447
k__Bacteria; p__Proteobacteria; c__Gammaproteobacteria; o__Enterobacteriales; f__Enterobacteriaceae; g__Erwinia	0.528398	63.4077	0.712446	0.00017704	0.000123806
k__Bacteria; p__Proteobacteria; c__Gammaproteobacteria; o__Pasteurellales; f__Pasteurellaceae; g__Aggregatibacter	0.532602	63.9122	0.710136	2.51963e-05	3.81505e-05
k__Bacteria; p__Actinobacteria; c__Actinobacteria; o__Coriobacteriales; f__Coriobacteriaceae; g__Adlercreutzia	0.537828	64.5393	0.709223	0.000213391	0.000128697
k__Bacteria; p__Proteobacteria; c__Betaproteobacteria; o__Burkholderiales; f__Comamonadaceae; g__Acidovorax	0.541328	64.9593	0.70608	2.74546e-05	1.58606e-05
k__Bacteria; p__Proteobacteria; c__Gammaproteobacteria; o__Thiotrichales; f__Piscirickettsiaceae; g__Methylophaga	0.543057	65.1668	0.700718	1.09554e-05	1.67579e-05
k__Bacteria; p__Actinobacteria; c__Actinobacteria; o__Coriobacteriales; f__Coriobacteriaceae; g__Eggerthella	0.584361	70.1233	0.745993	0.000145684	0.000180693
k__Bacteria; p__Firmicutes; c__Bacilli; o__Bacillales; f__Staphylococcaceae; g__Staphylococcus	0.593396	71.2075	0.749553	2.92958e-05	4.63556e-05
k__Bacteria; p__Bacteroidetes; c__Bacteroidia; o__Bacteroidales; f__Prevotellaceae; g__Prevotella	0.606119	72.7343	0.757649	0.00728904	0.0102684
k__Bacteria; p__Firmicutes; c__Clostridia; o__Clostridiales; f__Clostridiaceae; g__Clostridium	0.647702	77.7242	0.80128	0.00563263	0.00453871
k__Bacteria; p__Proteobacteria; c__Betaproteobacteria; o__Neisseriales; f__Neisseriaceae; g__Neisseria	0.66112	79.3344	0.809535	0.000135756	0.000102241
k__Bacteria; p__Actinobacteria; c__Actinobacteria; o__Coriobacteriales; f__Coriobacteriaceae; g__Collinsella	0.662356	79.4827	0.802855	0.000400426	0.000351709
k__Bacteria; p__Firmicutes; c__Clostridia; o__Clostridiales; f__Lachnospiraceae; g__Roseburia	0.664948	79.7938	0.797938	0.00901628	0.00747469
k__Bacteria; p__Firmicutes; c__Clostridia; o__Clostridiales; f__ClostridialesFamilyXI.IncertaeSedis; g__	0.689167	82.7001	0.818813	0.000111751	9.03078e-05
k__Bacteria; p__Firmicutes; c__Clostridia; o__Clostridiales; f__Catabacteriaceae; g__	0.724479	86.9375	0.852329	0.00122099	0.00147968
k__Bacteria; p__Actinobacteria; c__Actinobacteria; o__Actinomycetales; f__Micrococcaceae; g__Rothia	0.731775	87.8131	0.852554	0.000155451	0.000193191
k__Bacteria; p__Proteobacteria; c__Gammaproteobacteria; o__Pasteurellales; f__Pasteurellaceae; g__	0.773763	92.8516	0.892804	0.00851422	0.00948771
k__Bacteria; p__Firmicutes; c__Bacilli; o__Lactobacillales; f__Carnobacteriaceae; g__	0.792435	95.0922	0.90564	6.14758e-05	4.36566e-05
k__Bacteria; p__Proteobacteria; c__Gammaproteobacteria; o__Enterobacteriales; f__Enterobacteriaceae; g__Proteus	0.793973	95.2767	0.898837	3.84159e-05	2.99485e-05
k__Bacteria; p__Firmicutes; c__Clostridia; o__Clostridiales; f__Veillonellaceae; g__	0.805297	96.6357	0.903137	0.00171018	0.00151873
k__Bacteria; p__Bacteroidetes; c__Bacteroidia; o__Bacteroidales; f__Rikenellaceae; g__	0.808879	97.0655	0.898755	0.000173351	0.000159395
k__Bacteria; p__Firmicutes; c__Bacilli; o__Lactobacillales; f__Carnobacteriaceae; g__Granulicatella	0.821412	98.5694	0.904307	0.000343306	0.000280209
k__Bacteria; p__Bacteroidetes; c__Bacteroidia; o__Bacteroidales; f__Prevotellaceae; g__	0.830289	99.6347	0.90577	0.000879485	0.000682039
k__Bacteria; p__Bacteroidetes; c__Bacteroidia; o__Bacteroidales; f__Porphyromonadaceae; g__Porphyromonas	0.840576	100.869	0.908731	3.99832e-05	3.41942e-05
k__Bacteria; p__Firmicutes; c__Clostridia; o__Clostridiales; f__ClostridialesFamilyXIII.IncertaeSedis; g__Eubacterium	0.873038	104.765	0.935398	1.96877e-05	2.15123e-05
k__Bacteria; p__Proteobacteria; c__Deltaproteobacteria; o__Desulfovibrionales; f__Desulfovibrionaceae; g__Bilophila	0.880397	105.648	0.934935	0.00404739	0.00428654
k__Bacteria; p__Proteobacteria; c__Gammaproteobacteria; o__Pasteurellales; f__Pasteurellaceae; g__Actinobacillus	0.889385	106.726	0.936195	0.000414527	0.000380003
k__Bacteria; p__Proteobacteria; c__Betaproteobacteria; o__Burkholderiales; f__Alcaligenaceae; g__	0.890805	106.897	0.929536	0.00236339	0.00222884
k__Bacteria; p__Tenericutes; c__Erysipelotrichi; o__Erysipelotrichales; f__Erysipelotrichaceae; g__Bulleidia	0.906625	108.795	0.937888	4.69709e-05	5.18972e-05
k__Bacteria; p__Firmicutes; c__Clostridia; o__Clostridiales; f__Lachnospiraceae; g__Dorea	0.91088	109.306	0.934236	0.00461289	0.00446447
k__Bacteria; p__Firmicutes; c__Clostridia; o__Clostridiales; f__Ruminococcaceae; g__Eubacterium	0.93781	112.537	0.953705	0.000637552	0.000618478
k__Bacteria; p__Firmicutes; c__Clostridia; o__Clostridiales; f__Lachnospiraceae; g__	0.990543	118.865	0.998867	0.0843068	0.0844457
k__Bacteria; p__Proteobacteria; c__Gammaproteobacteria; o__Pasteurellales; f__Pasteurellaceae; g__Haemophilus	0.995972	119.517	0.995972	0.000219257	0.000219857

## Sheet: Species
Consensus Lineage	prob	Bonferroni_corrected	FDR_corrected	NM_mean	UC_mean
k__Bacteria; p__Tenericutes; c__Erysipelotrichi; o__Erysipelotrichales; f__Erysipelotrichaceae; g__Bulleidia; s__Solobacteriummoorei	4.0186e-06	0.000683163	0.000683163	2.58771e-06	4.97735e-05
k__Bacteria; p__Firmicutes; c__Clostridia; o__Clostridiales; f__Ruminococcaceae; g__Oscillospira; s__Oscillospiraguilliermondii	0.000281458	0.0478478	0.0239239	4.86915e-05	0.000232497
k__Bacteria; p__Actinobacteria; c__Actinobacteria; o__Bifidobacteriales; f__Bifidobacteriaceae; g__Bifidobacterium; s__	0.00033286	0.0565862	0.0188621	0.00071222	0.00324967
k__Bacteria; p__Proteobacteria; c__Epsilonproteobacteria; o__Campylobacterales; f__Campylobacteraceae; g__Campylobacter; s__Campylobactergracilis	0.00038634	0.0656778	0.0164195	6.84045e-06	0.000161603
k__Bacteria; p__Firmicutes; c__Bacilli; o__Turicibacterales; f__Turicibacteraceae; g__Turicibacter; s__	0.000485764	0.0825798	0.016516	4.45947e-06	8.14072e-05
k__Bacteria; p__Firmicutes; c__Clostridia; o__Clostridiales; f__Veillonellaceae; g__Dialister; s__Dialisterpneumosintes	0.000568575	0.0966578	0.0161096	2.01394e-05	0.00259925
k__Bacteria; p__Proteobacteria; c__Betaproteobacteria; o__Burkholderiales; f__; g__; s__	0.000694015	0.117983	0.0168547	8.13358e-06	0.000188004
k__Bacteria; p__Firmicutes; c__Clostridia; o__Clostridiales; f__Ruminococcaceae; g__Anaerotruncus; s__Anaerotruncuscolihominis	0.00126576	0.21518	0.0268975	7.50658e-05	0.000317777
k__Bacteria; p__Firmicutes; c__Clostridia; o__Clostridiales; f__Lachnospiraceae; g__Oribacterium; s__	0.00168396	0.286272	0.0318081	0.000310392	0.000875973
k__Bacteria; p__Bacteroidetes; c__Bacteroidia; o__Bacteroidales; f__Bacteroidaceae; g__Bacteroides; s__Bacteroidesuniformis	0.00187611	0.318939	0.0318939	0.00796937	0.0188102
k__Bacteria; p__Firmicutes; c__Clostridia; o__Clostridiales; f__Ruminococcaceae; g__Clostridium; s__Clostridiummethylpentosum	0.00215849	0.366943	0.0333585	1.03632e-05	8.46569e-05
k__Bacteria; p__Firmicutes; c__Bacilli; o__Bacillales; f__Bacillaceae; g__Bacillus; s__	0.00252671	0.42954	0.035795	2.86407e-05	0.000112246
k__Bacteria; p__Firmicutes; c__Bacilli; o__Lactobacillales; f__Lactobacillaceae; g__Lactobacillus; s__	0.00502743	0.854662	0.0657433	4.02511e-05	0.000174009
k__Bacteria; p__Firmicutes; c__Bacilli; o__Gemellales; f__Gemellaceae; g__Gemella; s__	0.00733066	1.24621	0.0890151	0.000108304	0.000479577
k__Bacteria; p__Firmicutes; c__Clostridia; o__Clostridiales; f__Veillonellaceae; g__Veillonella; s__	0.00782635	1.33048	0.0886987	0.00201852	0.00719517
k__Bacteria; p__Firmicutes; c__Clostridia; o__Clostridiales; f__Lachnospiraceae; g__Ruminococcus; s__Ruminococcustorques	0.00835751	1.42078	0.0887986	0.0416833	0.0139871
k__Bacteria; p__Firmicutes; c__Bacilli; o__Lactobacillales; f__Enterococcaceae; g__Enterococcus; s__	0.00935434	1.59024	0.0935434	4.47307e-05	0.000680835
No blast hit; Other; Other; Other; Other; Other; Other	0.0100485	1.70824	0.0949021	0.00103238	0.00435993
k__Bacteria; p__Firmicutes; c__Bacilli; o__Lactobacillales; f__Enterococcaceae; g__Vagococcus; s__	0.0109151	1.85557	0.0976614	1.32905e-05	0.000211771
k__Bacteria; p__Tenericutes; c__Erysipelotrichi; o__Erysipelotrichales; f__Erysipelotrichaceae; g__Clostridium; s__	0.0112967	1.92045	0.0960223	0.00631966	0.00236356
k__Bacteria; p__Tenericutes; c__Erysipelotrichi; o__Erysipelotrichales; f__Erysipelotrichaceae; g__; s__Eubacteriumcylindroides	0.0123122	2.09307	0.0996702	0.000479894	0.0108822
k__Bacteria; p__Proteobacteria; c__Gammaproteobacteria; o__Alteromonadales; f__; g__Alkalimonas; s__	0.0123249	2.09523	0.0952377	3.22801e-05	0.000105691
k__Bacteria; p__Tenericutes; c__Erysipelotrichi; o__Erysipelotrichales; f__Erysipelotrichaceae; g__Coprobacillus; s__	0.0138056	2.34696	0.102042	6.50717e-05	0.000465147
k__Bacteria; p__Proteobacteria; c__Deltaproteobacteria; o__Desulfovibrionales; f__Desulfovibrionaceae; g__Desulfovibrio; s__Desulfovibriodesulfuricans	0.0143363	2.43717	0.101549	0.00048535	2.53746e-06
k__Bacteria; p__Tenericutes; c__Mollicutes; o__RF39; f__; g__; s__	0.0152955	2.60024	0.104009	0.000884729	2.23343e-05
k__Bacteria; p__Tenericutes; c__Erysipelotrichi; o__Erysipelotrichales; f__Erysipelotrichaceae; g__; s__Clostridiuminnocuum	0.0171688	2.91869	0.112257	0.00294533	0.0166128
k__Bacteria; p__Proteobacteria; c__Betaproteobacteria; o__Neisseriales; f__Neisseriaceae; g__Eikenella; s__Eikenellacorrodens	0.0221862	3.77165	0.139691	8.93772e-05	8.92008e-06
k__Bacteria; p__Proteobacteria; c__Gammaproteobacteria; o__Enterobacteriales; f__Enterobacteriaceae; g__Pantoea; s__Pantoeaoleae	0.0230896	3.92524	0.140187	7.66859e-06	4.15522e-05
k__Bacteria; p__Firmicutes; c__Clostridia; o__Clostridiales; f__Lachnospiraceae; g__Clostridium; s__Clostridiumbolteae	0.0294413	5.00502	0.172587	0.00359298	0.00997569
k__Bacteria; p__Firmicutes; c__Clostridia; o__Clostridiales; f__Lachnospiraceae; g__Blautia; s__Blautiaproducta	0.0319775	5.43618	0.181206	0.000721725	0.00139506
k__Bacteria; p__Actinobacteria; c__Actinobacteria; o__Bifidobacteriales; f__Bifidobacteriaceae; g__Bifidobacterium; s__Bifidobacteriumpseudocatenulatum	0.0323535	5.5001	0.177423	5.04295e-05	0.000149754
k__Bacteria; p__Tenericutes; c__Erysipelotrichi; o__Erysipelotrichales; f__Erysipelotrichaceae; g__Holdemania; s__	0.0344135	5.85029	0.182822	0.000161212	0.000406391
k__Bacteria; p__Actinobacteria; c__Actinobacteria; o__Coriobacteriales; f__Coriobacteriaceae; g__Slackia; s__	0.0347704	5.91096	0.17912	1.70442e-05	0.000129334
k__Bacteria; p__Actinobacteria; c__Actinobacteria; o__Coriobacteriales; f__Coriobacteriaceae; g__Collinsella; s__	0.0377612	6.4194	0.188806	7.18487e-06	0.00010109
k__Bacteria; p__Firmicutes; c__Clostridia; o__Clostridiales; f__Lachnospiraceae; g__Blautia; s__	0.0397183	6.75211	0.192918	0.0125168	0.00776404
k__Bacteria; p__Actinobacteria; c__Actinobacteria; o__Bifidobacteriales; f__Bifidobacteriaceae; g__Bifidobacterium; s__Bifidobacteriumanimalis	0.0398488	6.77429	0.188175	1.05067e-05	3.20464e-05
k__Bacteria; p__Proteobacteria; c__Alphaproteobacteria; o__; f__; g__; s__	0.0420578	7.14983	0.193239	0.000185438	0.0023841
k__Bacteria; p__Firmicutes; c__Clostridia; o__Clostridiales; f__Ruminococcaceae; g__; s__	0.0431202	7.33044	0.192906	0.0354261	0.0243048
k__Bacteria; p__Actinobacteria; c__Actinobacteria; o__Bifidobacteriales; f__; g__; s__	0.0445656	7.57616	0.19426	1.33174e-05	3.86276e-05
k__Bacteria; p__Firmicutes; c__Clostridia; o__Clostridiales; f__Lachnospiraceae; g__Anaerostipes; s__	0.0474384	8.06452	0.201613	0.000142826	0.000371589
k__Bacteria; p__Firmicutes; c__Clostridia; o__Clostridiales; f__Lachnospiraceae; g__Ruminococcus; s__	0.0488493	8.30438	0.202546	0.028066	0.0128739
k__Bacteria; p__Synergistetes; c__Synergistia; o__Synergistales; f__Synergistaceae; g__Cloacibacillus; s__	0.0494695	8.40981	0.200234	9.9131e-05	0.000630358
k__Bacteria; p__Firmicutes; c__Clostridia; o__Clostridiales; f__; g__; s__	0.0498097	8.46766	0.196922	0.0111958	0.00682162
k__Bacteria; p__Firmicutes; c__Clostridia; o__Clostridiales; f__Veillonellaceae; g__Veillonella; s__Veillonellaparvula	0.0529577	9.0028	0.204609	0.000803612	0.00165909
k__Bacteria; p__Firmicutes; c__Clostridia; o__Clostridiales; f__Ruminococcaceae; g__Clostridium; s__	0.0551105	9.36879	0.208195	0.00658584	0.00449731
k__Bacteria; p__Bacteroidetes; c__Bacteroidia; o__Bacteroidales; f__Rikenellaceae; g__Alistipes; s__	0.0551973	9.38354	0.20399	0.00743827	0.0137706
k__Bacteria; p__Proteobacteria; c__Gammaproteobacteria; o__Pseudomonadales; f__Pseudomonadaceae; g__Pseudomonas; s__	0.056337	9.57729	0.203772	0.000129726	4.24725e-06
k__Bacteria; p__Firmicutes; c__Clostridia; o__Clostridiales; f__ClostridialesFamilyXIII.IncertaeSedis; g__; s__	0.0571089	9.70852	0.202261	0.000598201	0.000104123
k__Bacteria; p__Firmicutes; c__Clostridia; o__Clostridiales; f__Veillonellaceae; g__Dialister; s__Dialisterinvisus	0.0588755	10.0088	0.204262	0.00334567	0.00758022
k__Bacteria; p__Bacteroidetes; c__Bacteroidia; o__Bacteroidales; f__Bacteroidaceae; g__Bacteroides; s__Bacteroidescaccae	0.0604624	10.2786	0.205572	0.00587242	0.0104769
k__Bacteria; p__Proteobacteria; c__Gammaproteobacteria; o__Enterobacteriales; f__Enterobacteriaceae; g__Plesiomonas; s__Plesiomonasshigelloides	0.0619781	10.5363	0.206594	4.19698e-05	9.44466e-05
k__Bacteria; p__Tenericutes; c__Erysipelotrichi; o__Erysipelotrichales; f__Erysipelotrichaceae; g__; s__	0.062378	10.6043	0.203928	0.000380268	0.000898011
k__Bacteria; p__Bacteroidetes; c__Bacteroidia; o__Bacteroidales; f__Bacteroidaceae; g__Bacteroides; s__Bacteroidesplebeius	0.0657045	11.1698	0.21075	0.0020035	0.0121638
k__Bacteria; p__Verrucomicrobia; c__Verrucomicrobiae; o__Verrucomicrobiales; f__Verrucomicrobiaceae; g__Akkermansia; s__	0.0737386	12.5356	0.23214	0.00309494	0.0120659
k__Bacteria; p__Proteobacteria; c__Gammaproteobacteria; o__Enterobacteriales; f__Enterobacteriaceae; g__Rahnella; s__	0.0748996	12.7329	0.231508	0.0023186	0.00516689
k__Bacteria; p__Proteobacteria; c__Gammaproteobacteria; o__Enterobacteriales; f__Enterobacteriaceae; g__Serratia; s__Serratiamarcescens	0.0787081	13.3804	0.238935	7.75991e-06	2.48947e-05
k__Bacteria; p__Actinobacteria; c__Actinobacteria; o__Actinomycetales; f__Actinomycetaceae; g__Actinomyces; s__	0.0796506	13.5406	0.237554	0.00010245	0.000211626
k__Bacteria; p__Firmicutes; c__Clostridia; o__Clostridiales; f__ClostridialesFamilyXI.IncertaeSedis; g__; s__Parvimonasmicra	0.0817357	13.8951	0.23957	8.26659e-05	1.64528e-05
k__Bacteria; p__Proteobacteria; c__Gammaproteobacteria; o__Pasteurellales; f__Pasteurellaceae; g__; s__BisgaardTaxon10	0.0861619	14.6475	0.248263	4.37552e-05	2.42982e-06
k__Bacteria; p__Proteobacteria; c__Betaproteobacteria; o__Burkholderiales; f__Alcaligenaceae; g__Sutterella; s__Sutterellaparvirubra	0.0882323	14.9995	0.249992	0.000452696	6.50175e-05
k__Archaea; p__Euryarchaeota; c__Methanobacteria; o__Methanobacteriales; f__Methanobacteriaceae; g__Methanobrevibacter; s__Methanobrevibactersmithii	0.091839	15.6126	0.255945	9.41533e-06	6.16581e-05
k__Bacteria; p__Proteobacteria; c__Gammaproteobacteria; o__Enterobacteriales; f__Enterobacteriaceae; g__Serratia; s__	0.0941433	16.0044	0.258135	0.000452579	0.000962363
k__Bacteria; p__Firmicutes; c__Clostridia; o__Clostridiales; f__Lachnospiraceae; g__Clostridium; s__	0.097541	16.582	0.263206	0.0475453	0.0362483
k__Bacteria; p__Firmicutes; c__Clostridia; o__Clostridiales; f__Lachnospiraceae; g__Eubacterium; s__	0.0985302	16.7501	0.261721	0.00193248	0.00093222
k__Bacteria; p__Firmicutes; c__Clostridia; o__Clostridiales; f__Peptostreptococcaceae; g__Peptostreptococcus; s__	0.108081	18.3738	0.282673	6.78881e-05	0.000270582
k__Bacteria; p__Firmicutes; c__Clostridia; o__Clostridiales; f__Lachnospiraceae; g__Lachnospira; s__	0.11335	19.2695	0.291961	0.00418964	0.00234855
k__Bacteria; p__Bacteroidetes; c__Bacteroidia; o__Bacteroidales; f__Porphyromonadaceae; g__Parabacteroides; s__Parabacteroidesjohnsonii	0.117798	20.0257	0.298891	0.000856834	0.000185094
k__Bacteria; p__Bacteroidetes; c__Bacteroidia; o__Bacteroidales; f__Porphyromonadaceae; g__Odoribacter; s__	0.118049	20.0684	0.295123	0.00117334	0.00185794
k__Bacteria; p__Proteobacteria; c__Gammaproteobacteria; o__Chromatiales; f__; g__; s__	0.12334	20.9677	0.30388	7.07135e-05	0.000148697
k__Bacteria; p__Firmicutes; c__Bacilli; o__Lactobacillales; f__Streptococcaceae; g__Streptococcus; s__	0.130772	22.2312	0.317589	0.00252818	0.00514905
k__Bacteria; p__Firmicutes; c__Clostridia; o__Clostridiales; f__ClostridialesFamilyXI.IncertaeSedis; g__; s__	0.131276	22.3169	0.314322	2.90853e-05	7.38551e-05
k__Bacteria; p__Bacteroidetes; c__Bacteroidia; o__Bacteroidales; f__Bacteroidaceae; g__Bacteroides; s__Bacteroidesfragilis	0.13481	22.9177	0.318302	0.0964413	0.0612767
k__Bacteria; p__Proteobacteria; c__Gammaproteobacteria; o__Enterobacteriales; f__Enterobacteriaceae; g__Escherichia; s__	0.139167	23.6584	0.324087	7.60155e-05	0.000168099
k__Bacteria; p__Firmicutes; c__Clostridia; o__Clostridiales; f__Ruminococcaceae; g__Ruminococcus; s__	0.148954	25.3222	0.342192	0.0026384	0.00463722
k__Bacteria; p__Firmicutes; c__Clostridia; o__Clostridiales; f__Lachnospiraceae; g__Coprococcus; s__Coprococcuseutactus	0.154501	26.2652	0.350203	3.88761e-05	9.46997e-06
k__Bacteria; p__Bacteroidetes; c__Bacteroidia; o__Bacteroidales; f__Porphyromonadaceae; g__Parabacteroides; s__Parabacteroidesdistasonis	0.155689	26.4672	0.348252	0.0125865	0.0193115
k__Bacteria; p__Proteobacteria; c__Gammaproteobacteria; o__Enterobacteriales; f__Enterobacteriaceae; g__; s__	0.163627	27.8166	0.361255	0.0329679	0.0581638
k__Bacteria; p__Actinobacteria; c__Actinobacteria; o__Coriobacteriales; f__Coriobacteriaceae; g__Collinsella; s__Collinsellaaerofaciens	0.168448	28.6362	0.367131	0.000393241	0.00025062
k__Bacteria; p__Proteobacteria; c__Alphaproteobacteria; o__Rhodospirillales; f__Acetobacteraceae; g__; s__	0.177456	30.1675	0.381868	4.15011e-05	0.000105833
k__Bacteria; p__Cyanobacteria; c__4C0d-2; o__YS2; f__; g__; s__	0.178829	30.401	0.380012	0.000252529	0
k__Bacteria; p__Firmicutes; c__Clostridia; o__Clostridiales; f__Peptococcaceae; g__Peptococcus; s__	0.189063	32.1406	0.396798	0.00023566	5.07492e-06
k__Bacteria; p__Proteobacteria; c__Betaproteobacteria; o__Burkholderiales; f__Comamonadaceae; g__Ramlibacter; s__	0.189531	32.2203	0.39293	9.89438e-06	2.30955e-05
k__Bacteria; p__Proteobacteria; c__Betaproteobacteria; o__Burkholderiales; f__Oxalobacteraceae; g__; s__	0.195	33.15	0.399398	0.00011529	0.000182234
k__Bacteria; p__Proteobacteria; c__Deltaproteobacteria; o__Desulfovibrionales; f__Desulfovibrionaceae; g__Desulfovibrio; s__	0.211128	35.8917	0.427282	0.00251655	0.00032775
k__Bacteria; p__Firmicutes; c__Clostridia; o__Clostridiales; f__Ruminococcaceae; g__Faecalibacterium; s__Faecalibacteriumprausnitzii	0.219561	37.3254	0.439123	7.04469e-05	4.85398e-05
k__Bacteria; p__Firmicutes; c__Clostridia; o__Clostridiales; f__Lachnospiraceae; g__Coprococcus; s__	0.221379	37.6344	0.43761	0.00885049	0.00593986
k__Bacteria; p__Firmicutes; c__Clostridia; o__Clostridiales; f__Veillonellaceae; g__Acidaminococcus; s__	0.22292	37.8964	0.43559	0.00117353	0.00224286
k__Bacteria; p__Bacteroidetes; c__Bacteroidia; o__Bacteroidales; f__Porphyromonadaceae; g__Porphyromonas; s__	0.229497	39.0144	0.443346	3.24936e-05	5.33023e-06
k__Bacteria; p__Actinobacteria; c__Actinobacteria; o__Coriobacteriales; f__; g__; s__	0.234381	39.8447	0.447694	8.30998e-05	4.40586e-05
k__Bacteria; p__Bacteroidetes; c__Bacteroidia; o__Bacteroidales; f__Rikenellaceae; g__Alistipes; s__Alistipesputredinis	0.241779	41.1025	0.456694	0.00580441	0.00879148
k__Bacteria; p__Firmicutes; c__Clostridia; o__Clostridiales; f__Clostridiaceae; g__; s__	0.242355	41.2004	0.452752	0.0038162	0.000225292
k__Bacteria; p__Firmicutes; c__Clostridia; o__Clostridiales; f__Lachnospiraceae; g__Butyrivibrio; s__	0.244105	41.4979	0.451064	6.03014e-05	3.63347e-05
k__Bacteria; p__Firmicutes; c__Clostridia; o__Clostridiales; f__Ruminococcaceae; g__Faecalibacterium; s__	0.254729	43.304	0.465634	0.0720147	0.0595065
k__Bacteria; p__Firmicutes; c__Clostridia; o__Clostridiales; f__Ruminococcaceae; g__Oscillospira; s__	0.25587	43.4979	0.462743	0.00512107	0.00682698
k__Bacteria; p__Firmicutes; c__Clostridia; o__Clostridiales; f__Veillonellaceae; g__Phascolarctobacterium; s__	0.256838	43.6625	0.459605	0.00503012	0.00775732
k__Bacteria; p__Firmicutes; c__Clostridia; o__Clostridiales; f__Lachnospiraceae; g__Roseburia; s__Roseburiafaecis	0.259487	44.1128	0.459508	0.000123249	2.97147e-05
k__Bacteria; p__Proteobacteria; c__Betaproteobacteria; o__; f__; g__; s__	0.261303	44.4216	0.457955	7.95794e-05	3.01285e-05
k__Bacteria; p__Firmicutes; c__Clostridia; o__Clostridiales; f__Eubacteriaceae; g__Eubacterium; s__Eubacteriumlimosum	0.281253	47.8129	0.487887	7.54172e-05	0.000165455
k__Bacteria; p__Firmicutes; c__Clostridia; o__Clostridiales; f__Lachnospiraceae; g__Lachnobacterium; s__	0.289912	49.2851	0.497829	0.00129656	0.000982373
k__Bacteria; p__Fusobacteria; c__Fusobacteria; o__Fusobacteriales; f__Fusobacteriaceae; g__Leptotrichia; s__	0.291916	49.6258	0.496258	0.00011063	3.92985e-05
k__Bacteria; p__Actinobacteria; c__Actinobacteria; o__Coriobacteriales; f__Coriobacteriaceae; g__Atopobium; s__	0.298111	50.6788	0.501771	3.15358e-05	5.22475e-05
k__Bacteria; p__Firmicutes; c__Clostridia; o__Clostridiales; f__Ruminococcaceae; g__Ruminococcus; s__Ruminococcusflavefaciens	0.311866	53.0172	0.519777	0.000164129	7.16412e-05
k__Bacteria; p__Proteobacteria; c__Gammaproteobacteria; o__Pasteurellales; f__Pasteurellaceae; g__Haemophilus; s__Haemophilusparainfluenzae	0.324266	55.1252	0.535196	0.000114847	5.39421e-05
k__Bacteria; p__Firmicutes; c__Clostridia; o__Clostridiales; f__Peptococcaceae; g__; s__	0.348601	59.2621	0.569828	0.000704042	0.000264642
k__Bacteria; p__Proteobacteria; c__Epsilonproteobacteria; o__Campylobacterales; f__Campylobacteraceae; g__Campylobacter; s__Campylobacterconcisus	0.348715	59.2816	0.564587	2.56582e-05	1.10349e-05
k__Bacteria; p__Proteobacteria; c__Gammaproteobacteria; o__Pasteurellales; f__Pasteurellaceae; g__Actinobacillus; s__	0.353376	60.0739	0.566735	0.000294274	0.000145147
k__Bacteria; p__Proteobacteria; c__Gammaproteobacteria; o__Enterobacteriales; f__Enterobacteriaceae; g__Pantoea; s__	0.355886	60.5006	0.565426	7.59236e-05	0.000120163
k__Bacteria; p__Tenericutes; c__Erysipelotrichi; o__Erysipelotrichales; f__Erysipelotrichaceae; g__Allobaculum; s__	0.355988	60.518	0.560352	3.19521e-05	8.54446e-06
k__Bacteria; p__Proteobacteria; c__Deltaproteobacteria; o__Desulfovibrionales; f__Desulfovibrionaceae; g__LE30; s__	0.357399	60.7579	0.557412	6.3088e-05	0.00013451
k__Bacteria; p__Firmicutes; c__Clostridia; o__Clostridiales; f__Ruminococcaceae; g__Clostridium; s__Clostridiumleptum	0.36613	62.2422	0.565838	0.000307169	0.000132499
k__Bacteria; p__Firmicutes; c__Clostridia; o__Clostridiales; f__Ruminococcaceae; g__Bacteroides; s__Bacteroidescapillosus	0.369003	62.7305	0.56514	4.74343e-05	2.71038e-05
k__Bacteria; p__Proteobacteria; c__Gammaproteobacteria; o__Pseudomonadales; f__Moraxellaceae; g__Acinetobacter; s__	0.372565	63.336	0.5655	4.13435e-05	7.74865e-05
k__Bacteria; p__Firmicutes; c__Bacilli; o__Lactobacillales; f__Carnobacteriaceae; g__Granulicatella; s__Granulicatellaelegans	0.393692	66.9276	0.592279	3.26554e-05	1.24245e-05
k__Bacteria; p__Bacteroidetes; c__Bacteroidia; o__Bacteroidales; f__Porphyromonadaceae; g__; s__	0.397687	67.6068	0.593042	0.000570252	0.000798664
k__Bacteria; p__Bacteroidetes; c__Bacteroidia; o__Bacteroidales; f__; g__; s__	0.403541	68.602	0.596539	0.0219811	0.0278844
k__Bacteria; p__Proteobacteria; c__Betaproteobacteria; o__Burkholderiales; f__Alcaligenaceae; g__Sutterella; s__	0.409338	69.5874	0.599892	0.00369363	0.00248954
k__Bacteria; p__Proteobacteria; c__Gammaproteobacteria; o__Pasteurellales; f__Pasteurellaceae; g__Actinobacillus; s__Haemophilusparahaemolyticus	0.42062	71.5054	0.611157	8.88586e-05	0.000185871
k__Bacteria; p__Firmicutes; c__Clostridia; o__Clostridiales; f__Dehalobacteriaceae; g__Dehalobacterium; s__	0.425959	72.413	0.613669	2.11988e-05	1.06815e-05
k__Bacteria; p__Proteobacteria; c__Betaproteobacteria; o__Burkholderiales; f__Comamonadaceae; g__Hylemonella; s__	0.438235	74.4999	0.626049	0.000466424	7.44383e-05
k__Bacteria; p__Firmicutes; c__Clostridia; o__Clostridiales; f__Clostridiaceae; g__Clostridium; s__	0.439394	74.697	0.622475	0.00562473	0.00380208
k__Bacteria; p__Proteobacteria; c__Gammaproteobacteria; o__Pasteurellales; f__Pasteurellaceae; g__Actinobacillus; s__Actinobacillusporcinus	0.44974	76.4558	0.631866	3.1394e-05	4.89849e-05
k__Bacteria; p__Verrucomicrobia; c__Verrucomicrobiae; o__Verrucomicrobiales; f__Verrucomicrobiaceae; g__Akkermansia; s__Akkermansiamuciniphila	0.46337	78.7729	0.645679	0.00258025	0.00164839
k__Bacteria; p__Synergistetes; c__Synergistia; o__Synergistales; f__Synergistaceae; g__Synergistes; s__	0.475664	80.8628	0.657421	4.17976e-05	6.79363e-05
k__Bacteria; p__Tenericutes; c__Erysipelotrichi; o__Erysipelotrichales; f__Erysipelotrichaceae; g__; s__Eubacteriumdolichum	0.48666	82.7322	0.667195	9.80952e-05	4.38701e-05
k__Bacteria; p__Proteobacteria; c__Gammaproteobacteria; o__Pasteurellales; f__Pasteurellaceae; g__Haemophilus; s__	0.488536	83.0511	0.664409	0.000100366	0.000165915
k__Bacteria; p__Actinobacteria; c__Actinobacteria; o__Actinomycetales; f__Micrococcaceae; g__Rothia; s__	0.491561	83.5654	0.663218	9.26015e-05	0.000137998
k__Bacteria; p__Firmicutes; c__Clostridia; o__Clostridiales; f__Ruminococcaceae; g__Clostridium; s__Clostridiumorbiscindens	0.494722	84.1027	0.662226	0.00276498	0.00337005
k__Bacteria; p__Firmicutes; c__Clostridia; o__Clostridiales; f__Eubacteriaceae; g__Anaerofustis; s__Anaerofustisstercorihominis	0.504739	85.8056	0.670356	1.66839e-05	2.43704e-05
k__Bacteria; p__Proteobacteria; c__Gammaproteobacteria; o__Enterobacteriales; f__Enterobacteriaceae; g__Cronobacter; s__	0.506257	86.0636	0.66716	3.1025e-05	4.59221e-05
k__Bacteria; p__Proteobacteria; c__Gammaproteobacteria; o__Enterobacteriales; f__Enterobacteriaceae; g__Erwinia; s__Erwiniatoletana	0.506501	86.1051	0.662347	7.88348e-05	5.7619e-05
k__Bacteria; p__Fusobacteria; c__Fusobacteria; o__Fusobacteriales; f__Fusobacteriaceae; g__Fusobacterium; s__	0.525005	89.2509	0.681304	0.00672504	0.00990447
k__Bacteria; p__Proteobacteria; c__Gammaproteobacteria; o__Pasteurellales; f__Pasteurellaceae; g__Aggregatibacter; s__Aggregatibactersegnis	0.532602	90.5423	0.685927	2.51963e-05	3.81505e-05
k__Bacteria; p__Actinobacteria; c__Actinobacteria; o__Coriobacteriales; f__Coriobacteriaceae; g__Adlercreutzia; s__	0.537828	91.4307	0.687449	0.000213391	0.000128697
k__Bacteria; p__Proteobacteria; c__Gammaproteobacteria; o__Thiotrichales; f__Piscirickettsiaceae; g__Methylophaga; s__	0.543057	92.3197	0.688953	1.09554e-05	1.67579e-05
k__Bacteria; p__Firmicutes; c__Bacilli; o__Lactobacillales; f__Streptococcaceae; g__Streptococcus; s__Streptococcusthermophilus	0.581819	98.9092	0.73266	4.77226e-05	2.88815e-05
k__Bacteria; p__Actinobacteria; c__Actinobacteria; o__Coriobacteriales; f__Coriobacteriaceae; g__Eggerthella; s__Eggerthellalenta	0.584361	99.3414	0.730451	0.000145684	0.000180693
k__Bacteria; p__Firmicutes; c__Clostridia; o__Clostridiales; f__Lachnospiraceae; g__Roseburia; s__Eubacteriumrectale	0.595809	101.287	0.739325	0.00629295	0.00480734
k__Bacteria; p__Bacteroidetes; c__Bacteroidia; o__Bacteroidales; f__Prevotellaceae; g__Prevotella; s__	0.602505	102.426	0.742217	0.00723467	0.0102362
k__Bacteria; p__Firmicutes; c__Bacilli; o__Bacillales; f__Staphylococcaceae; g__Staphylococcus; s__	0.615981	104.717	0.753358	2.83244e-05	4.35774e-05
k__Bacteria; p__Firmicutes; c__Clostridia; o__Clostridiales; f__Lachnospiraceae; g__Ruminococcus; s__Ruminococcusgnavus	0.626928	106.578	0.76127	0.0328299	0.0276787
k__Bacteria; p__Firmicutes; c__Clostridia; o__Clostridiales; f__Lachnospiraceae; g__Oribacterium; s__Oribacteriumsinus	0.652635	110.948	0.786865	2.40167e-05	3.01397e-05
k__Bacteria; p__Bacteroidetes; c__Bacteroidia; o__Bacteroidales; f__Bacteroidaceae; g__Bacteroides; s__Bacteroideseggerthii	0.657866	111.837	0.787587	2.15472e-05	1.60017e-05
k__Bacteria; p__Proteobacteria; c__Betaproteobacteria; o__Neisseriales; f__Neisseriaceae; g__Neisseria; s__	0.66112	112.39	0.785947	0.000135756	0.000102241
k__Bacteria; p__Tenericutes; c__Erysipelotrichi; o__Erysipelotrichales; f__Erysipelotrichaceae; g__Holdemania; s__Holdemaniafiliformis	0.670057	113.91	0.79104	0.000298566	0.00035595
k__Bacteria; p__Proteobacteria; c__Gammaproteobacteria; o__Enterobacteriales; f__Enterobacteriaceae; g__Erwinia; s__	0.675616	114.855	0.792102	9.82051e-05	6.61867e-05
k__Bacteria; p__Tenericutes; c__Erysipelotrichi; o__Erysipelotrichales; f__Erysipelotrichaceae; g__Clostridium; s__Clostridiumspiroforme	0.693882	117.96	0.807945	0.00052457	0.000441087
k__Bacteria; p__Bacteroidetes; c__Bacteroidia; o__Bacteroidales; f__Bacteroidaceae; g__Bacteroides; s__	0.722878	122.889	0.835982	0.264917	0.254249
k__Bacteria; p__Firmicutes; c__Clostridia; o__Clostridiales; f__Catabacteriaceae; g__; s__	0.724479	123.161	0.832172	0.00122099	0.00147968
k__Bacteria; p__Tenericutes; c__Erysipelotrichi; o__Erysipelotrichales; f__Erysipelotrichaceae; g__Clostridium; s__Clostridiumramosum	0.754209	128.215	0.860507	0.00578234	0.00675176
k__Bacteria; p__Tenericutes; c__Erysipelotrichi; o__Erysipelotrichales; f__Erysipelotrichaceae; g__; s__Eubacteriumbiforme	0.760263	129.245	0.861631	0.00274287	0.00338086
k__Bacteria; p__Proteobacteria; c__Gammaproteobacteria; o__Pasteurellales; f__Pasteurellaceae; g__; s__	0.763665	129.823	0.859755	0.00846868	0.00948528
k__Bacteria; p__Firmicutes; c__Bacilli; o__Lactobacillales; f__Carnobacteriaceae; g__; s__	0.792435	134.714	0.886276	6.14758e-05	4.36566e-05
k__Bacteria; p__Firmicutes; c__Bacilli; o__Lactobacillales; f__Streptococcaceae; g__Streptococcus; s__Streptococcussanguinis	0.793915	134.966	0.882128	0.00141155	0.00121103
k__Bacteria; p__Proteobacteria; c__Gammaproteobacteria; o__Enterobacteriales; f__Enterobacteriaceae; g__Proteus; s__	0.793973	134.975	0.876463	3.84159e-05	2.99485e-05
k__Bacteria; p__Firmicutes; c__Clostridia; o__Clostridiales; f__Veillonellaceae; g__; s__	0.805297	136.901	0.883229	0.00171018	0.00151873
k__Bacteria; p__Bacteroidetes; c__Bacteroidia; o__Bacteroidales; f__Rikenellaceae; g__; s__	0.808879	137.509	0.881471	0.000173351	0.000159395
k__Bacteria; p__Bacteroidetes; c__Bacteroidia; o__Bacteroidales; f__Prevotellaceae; g__; s__	0.830289	141.149	0.899039	0.000879485	0.000682039
k__Bacteria; p__Firmicutes; c__Clostridia; o__Clostridiales; f__Ruminococcaceae; g__Anaerotruncus; s__	0.841698	143.089	0.905624	3.14738e-05	2.81527e-05
k__Bacteria; p__Firmicutes; c__Clostridia; o__Clostridiales; f__ClostridialesFamilyXIII.IncertaeSedis; g__Eubacterium; s__	0.873038	148.417	0.933437	1.96877e-05	2.15123e-05
k__Bacteria; p__Firmicutes; c__Bacilli; o__Lactobacillales; f__Carnobacteriaceae; g__Granulicatella; s__Granulicatellaadiacens	0.878067	149.271	0.932946	0.000310651	0.000267785
k__Bacteria; p__Actinobacteria; c__Actinobacteria; o__Actinomycetales; f__Micrococcaceae; g__Rothia; s__Rothiamucilaginosa	0.878916	149.416	0.928048	6.28499e-05	5.51924e-05
k__Bacteria; p__Proteobacteria; c__Deltaproteobacteria; o__Desulfovibrionales; f__Desulfovibrionaceae; g__Bilophila; s__Bilophilawadsworthia	0.880397	149.667	0.923873	0.00404739	0.00428654
k__Bacteria; p__Bacteroidetes; c__Bacteroidia; o__Bacteroidales; f__Porphyromonadaceae; g__Parabacteroides; s__	0.883379	150.174	0.921315	0.00981313	0.00941236
k__Bacteria; p__Proteobacteria; c__Betaproteobacteria; o__Burkholderiales; f__Alcaligenaceae; g__; s__	0.890805	151.437	0.923395	0.00236339	0.00222884
k__Bacteria; p__Firmicutes; c__Clostridia; o__Clostridiales; f__Lachnospiraceae; g__Dorea; s__Doreaformicigenerans	0.91088	154.85	0.938482	0.00461289	0.00446447
k__Bacteria; p__Tenericutes; c__Erysipelotrichi; o__Erysipelotrichales; f__Erysipelotrichaceae; g__; s__MLG480	0.933696	158.728	0.956195	0.000646661	0.000688732
k__Bacteria; p__Firmicutes; c__Clostridia; o__Clostridiales; f__Ruminococcaceae; g__Eubacterium; s__	0.93781	159.428	0.954657	0.000637552	0.000618478
k__Bacteria; p__Firmicutes; c__Clostridia; o__Clostridiales; f__Veillonellaceae; g__Dialister; s__	0.95694	162.68	0.968332	0.00151241	0.00155075
k__Bacteria; p__Firmicutes; c__Clostridia; o__Clostridiales; f__Lachnospiraceae; g__Roseburia; s__	0.96852	164.648	0.974251	0.00260008	0.00263764
k__Bacteria; p__Firmicutes; c__Clostridia; o__Clostridiales; f__Lachnospiraceae; g__; s__	0.990543	168.392	0.990543	0.0843068	0.0844457

## Sheet: OTUs
Consensus Lineage	prob	Bonferroni_corrected	FDR_corrected	NM_mean	UC_mean
k__Bacteria; p__Tenericutes; c__Erysipelotrichi; o__Erysipelotrichales; f__Erysipelotrichaceae; g__Bulleidia; s__Solobacteriummoorei	3.9437e-06	0.0046654	0.0046654	2.58771e-06	4.6303e-05
k__Bacteria; p__Firmicutes; c__Clostridia; o__Clostridiales; f__Lachnospiraceae; g__Clostridium; s__	8.99823e-06	0.0106449	0.00532246	0.00813084	0.00167023
k__Bacteria; p__Firmicutes; c__Clostridia; o__Clostridiales; f__Lachnospiraceae; g__; s__	1.97323e-05	0.0233433	0.00778112	0.000735422	0.00239762
k__Bacteria; p__Firmicutes; c__Clostridia; o__Clostridiales; f__Lachnospiraceae; g__; s__	2.73938e-05	0.0324069	0.00810173	0.00674285	0.0214784
k__Bacteria; p__Firmicutes; c__Clostridia; o__Clostridiales; f__Lachnospiraceae; g__; s__	9.8597e-05	0.11664	0.0233281	6.3332e-06	5.97062e-05
k__Bacteria; p__Firmicutes; c__Clostridia; o__Clostridiales; f__Ruminococcaceae; g__Oscillospira; s__Oscillospiraguilliermondii	0.000121895	0.144202	0.0240337	3.98457e-05	0.000232497
k__Bacteria; p__Firmicutes; c__Clostridia; o__Clostridiales; f__Lachnospiraceae; g__; s__	0.000123335	0.145905	0.0208436	0.000188432	0.00238304
k__Bacteria; p__Firmicutes; c__Clostridia; o__Clostridiales; f__Ruminococcaceae; g__Oscillospira; s__	0.000144878	0.17139	0.0214238	3.02705e-06	8.60109e-05
k__Bacteria; p__Firmicutes; c__Clostridia; o__Clostridiales; f__; g__; s__	0.000183	0.216489	0.0240544	0.000202645	2.91886e-05
k__Bacteria; p__Firmicutes; c__Clostridia; o__Clostridiales; f__Ruminococcaceae; g__; s__	0.000254925	0.301576	0.0301576	9.66089e-06	0.0001102
k__Bacteria; p__Firmicutes; c__Clostridia; o__Clostridiales; f__Ruminococcaceae; g__; s__	0.000382196	0.452138	0.0411034	5.43857e-06	0.000256926
k__Bacteria; p__Proteobacteria; c__Epsilonproteobacteria; o__Campylobacterales; f__Campylobacteraceae; g__Campylobacter; s__Campylobactergracilis	0.00038634	0.457041	0.0380867	6.84045e-06	0.000161603
k__Bacteria; p__Firmicutes; c__Clostridia; o__Clostridiales; f__Ruminococcaceae; g__Clostridium; s__	0.000482663	0.57099	0.0439223	4.07247e-05	0.000218845
k__Bacteria; p__Firmicutes; c__Bacilli; o__Turicibacterales; f__Turicibacteraceae; g__Turicibacter; s__	0.000485764	0.574658	0.041047	4.45947e-06	8.14072e-05
k__Bacteria; p__Firmicutes; c__Clostridia; o__Clostridiales; f__Ruminococcaceae; g__Oscillospira; s__	0.000518355	0.613214	0.040881	1.04883e-05	0.000441545
k__Bacteria; p__Firmicutes; c__Clostridia; o__Clostridiales; f__Lachnospiraceae; g__Blautia; s__	0.0005635	0.66662	0.0416638	1.56828e-05	0.000128535
k__Bacteria; p__Firmicutes; c__Clostridia; o__Clostridiales; f__Veillonellaceae; g__Dialister; s__Dialisterpneumosintes	0.000572364	0.677107	0.0398298	1.87094e-05	0.00237738
k__Bacteria; p__Firmicutes; c__Clostridia; o__Clostridiales; f__Ruminococcaceae; g__Anaerotruncus; s__Anaerotruncuscolihominis	0.0007615	0.900854	0.0500475	6.51117e-05	0.000308841
k__Bacteria; p__Firmicutes; c__Clostridia; o__Clostridiales; f__Lachnospiraceae; g__; s__	0.000777164	0.919385	0.0483887	0.00227297	0.000551106
k__Bacteria; p__Firmicutes; c__Clostridia; o__Clostridiales; f__Ruminococcaceae; g__; s__	0.000854214	1.01053	0.0505267	0.000297965	2.34585e-05
k__Bacteria; p__Firmicutes; c__Clostridia; o__Clostridiales; f__Lachnospiraceae; g__; s__	0.00085811	1.01514	0.0483402	1.4056e-05	7.87733e-05
k__Bacteria; p__Firmicutes; c__Clostridia; o__Clostridiales; f__Lachnospiraceae; g__; s__	0.00101961	1.2062	0.0548271	5.54025e-06	4.98517e-05
k__Bacteria; p__Firmicutes; c__Clostridia; o__Clostridiales; f__Ruminococcaceae; g__Oscillospira; s__	0.00110587	1.30825	0.0568803	0.000400706	0
k__Bacteria; p__Bacteroidetes; c__Bacteroidia; o__Bacteroidales; f__Bacteroidaceae; g__Bacteroides; s__	0.00112402	1.32971	0.0554048	0.000189175	4.97114e-05
k__Bacteria; p__Firmicutes; c__Clostridia; o__Clostridiales; f__Ruminococcaceae; g__; s__	0.00121288	1.43484	0.0573936	0.000861426	1.38996e-05
k__Bacteria; p__Firmicutes; c__Clostridia; o__Clostridiales; f__Ruminococcaceae; g__; s__	0.00121977	1.44299	0.0554995	8.48426e-05	0.000609277
k__Bacteria; p__Firmicutes; c__Clostridia; o__Clostridiales; f__Ruminococcaceae; g__; s__	0.00122267	1.44641	0.0535709	9.94345e-06	0.000125863
k__Bacteria; p__Firmicutes; c__Clostridia; o__Clostridiales; f__Lachnospiraceae; g__; s__	0.001301	1.53908	0.0549671	0.000135939	0.000593347
k__Bacteria; p__Firmicutes; c__Clostridia; o__Clostridiales; f__Ruminococcaceae; g__Oscillospira; s__	0.00139774	1.65353	0.0570183	8.4784e-05	0.000599234
k__Bacteria; p__Firmicutes; c__Clostridia; o__Clostridiales; f__Lachnospiraceae; g__; s__	0.00143166	1.69365	0.056455	0.000808041	4.29353e-05
k__Bacteria; p__Firmicutes; c__Clostridia; o__Clostridiales; f__Lachnospiraceae; g__; s__	0.00151173	1.78838	0.0576897	0.000311612	0.00127946
k__Bacteria; p__Firmicutes; c__Clostridia; o__Clostridiales; f__Lachnospiraceae; g__Ruminococcus; s__	0.0016016	1.89469	0.0592092	4.08496e-05	0.000667919
k__Bacteria; p__Firmicutes; c__Clostridia; o__Clostridiales; f__Lachnospiraceae; g__Oribacterium; s__	0.00168979	1.99902	0.0605764	0.000306459	0.000868874
k__Bacteria; p__Firmicutes; c__Clostridia; o__Clostridiales; f__Lachnospiraceae; g__; s__	0.00170293	2.01457	0.0592519	5.73429e-05	0.00036554
k__Bacteria; p__Firmicutes; c__Clostridia; o__Clostridiales; f__; g__; s__	0.00172747	2.0436	0.0583885	7.97849e-06	8.07939e-05
k__Bacteria; p__Firmicutes; c__Clostridia; o__Clostridiales; f__Ruminococcaceae; g__Clostridium; s__Clostridiummethylpentosum	0.00180181	2.13154	0.0592095	7.31081e-06	7.81873e-05
k__Bacteria; p__Firmicutes; c__Clostridia; o__Clostridiales; f__Lachnospiraceae; g__Ruminococcus; s__	0.00181779	2.15044	0.0581201	0.000125556	2.086e-05
k__Bacteria; p__Bacteroidetes; c__Bacteroidia; o__Bacteroidales; f__Bacteroidaceae; g__Bacteroides; s__Bacteroidesuniformis	0.00187132	2.21377	0.0582572	0.00761975	0.0181441
k__Bacteria; p__Firmicutes; c__Clostridia; o__Clostridiales; f__Lachnospiraceae; g__Clostridium; s__	0.00210696	2.49253	0.0639111	0.00251881	0.000109859
k__Bacteria; p__Bacteroidetes; c__Bacteroidia; o__Bacteroidales; f__Rikenellaceae; g__Alistipes; s__	0.0021342	2.52475	0.0631189	0.00220033	0.00741371
k__Bacteria; p__Firmicutes; c__Clostridia; o__Clostridiales; f__Lachnospiraceae; g__Blautia; s__	0.00228601	2.70435	0.0659596	3.29408e-05	0.000100216
k__Bacteria; p__Firmicutes; c__Clostridia; o__Clostridiales; f__Lachnospiraceae; g__; s__	0.00240912	2.84999	0.067857	0.00117143	0.000215128
k__Bacteria; p__Firmicutes; c__Clostridia; o__Clostridiales; f__Lachnospiraceae; g__; s__	0.00241416	2.85595	0.0664174	0.00141175	0.00619226
k__Bacteria; p__Firmicutes; c__Clostridia; o__Clostridiales; f__Lachnospiraceae; g__Ruminococcus; s__Ruminococcustorques	0.00307138	3.63344	0.0825782	0.000840906	0.000187982
k__Bacteria; p__Firmicutes; c__Bacilli; o__Bacillales; f__Bacillaceae; g__Bacillus; s__	0.00308779	3.65285	0.0811745	2.51495e-05	0.000102238
k__Bacteria; p__Firmicutes; c__Clostridia; o__Clostridiales; f__Lachnospiraceae; g__; s__	0.00314555	3.72119	0.0808954	0.000141615	0.000348242
k__Bacteria; p__Firmicutes; c__Clostridia; o__Clostridiales; f__Lachnospiraceae; g__Clostridium; s__	0.00331012	3.91587	0.0833164	9.01221e-05	1.22606e-05
k__Bacteria; p__Proteobacteria; c__Gammaproteobacteria; o__Enterobacteriales; f__Enterobacteriaceae; g__Pantoea; s__	0.0033409	3.95229	0.0823393	5.88332e-06	4.15239e-05
k__Bacteria; p__Firmicutes; c__Clostridia; o__Clostridiales; f__Lachnospiraceae; g__; s__	0.00370306	4.38072	0.0894025	6.51378e-05	2.53746e-06
k__Bacteria; p__Actinobacteria; c__Actinobacteria; o__Bifidobacteriales; f__Bifidobacteriaceae; g__Bifidobacterium; s__	0.00382253	4.52205	0.0904411	0.000626444	0.0020541
k__Bacteria; p__Firmicutes; c__Clostridia; o__Clostridiales; f__Ruminococcaceae; g__Faecalibacterium; s__	0.00420647	4.97625	0.0975736	0.000431837	8.79412e-05
k__Bacteria; p__Firmicutes; c__Clostridia; o__Clostridiales; f__Lachnospiraceae; g__Ruminococcus; s__Ruminococcustorques	0.00427545	5.05786	0.0972664	0.000209864	2.68063e-05
k__Bacteria; p__Firmicutes; c__Clostridia; o__Clostridiales; f__Lachnospiraceae; g__Clostridium; s__	0.00435439	5.15125	0.0971934	7.52129e-05	1.20074e-05
k__Bacteria; p__Firmicutes; c__Clostridia; o__Clostridiales; f__Lachnospiraceae; g__; s__	0.00440215	5.20775	0.0964398	1.20313e-05	9.27605e-05
k__Bacteria; p__Firmicutes; c__Clostridia; o__Clostridiales; f__Lachnospiraceae; g__; s__	0.00440504	5.21117	0.0947485	0.00025807	5.39646e-05
k__Bacteria; p__Firmicutes; c__Clostridia; o__Clostridiales; f__Lachnospiraceae; g__Ruminococcus; s__	0.00459733	5.43864	0.0971186	1.26312e-05	6.28785e-05
k__Bacteria; p__Firmicutes; c__Clostridia; o__Clostridiales; f__Ruminococcaceae; g__; s__	0.00471903	5.58261	0.0979406	0.00011696	1.74001e-05
k__Bacteria; p__Firmicutes; c__Clostridia; o__Clostridiales; f__Ruminococcaceae; g__; s__	0.00490187	5.79891	0.0999812	2.94211e-05	0.000164849
k__Bacteria; p__Bacteroidetes; c__Bacteroidia; o__Bacteroidales; f__Bacteroidaceae; g__Bacteroides; s__Bacteroidesfragilis	0.00535083	6.33003	0.107289	5.14514e-05	0
k__Bacteria; p__Bacteroidetes; c__Bacteroidia; o__Bacteroidales; f__Bacteroidaceae; g__Bacteroides; s__	0.00579063	6.85031	0.114172	0.000797646	0.000302198
k__Bacteria; p__Proteobacteria; c__Gammaproteobacteria; o__Alteromonadales; f__; g__Alkalimonas; s__	0.0058933	6.97177	0.114291	2.86407e-05	0.000105691
k__Bacteria; p__Bacteroidetes; c__Bacteroidia; o__Bacteroidales; f__Rikenellaceae; g__Alistipes; s__	0.00610555	7.22287	0.116498	0.000300422	0.000870506
k__Bacteria; p__Firmicutes; c__Clostridia; o__Clostridiales; f__Lachnospiraceae; g__Clostridium; s__	0.00610564	7.22297	0.11465	0.00169717	0.000595975
k__Bacteria; p__Firmicutes; c__Clostridia; o__Clostridiales; f__Ruminococcaceae; g__Clostridium; s__	0.00627339	7.42142	0.11596	6.31128e-05	6.44316e-06
k__Bacteria; p__Firmicutes; c__Clostridia; o__Clostridiales; f__Lachnospiraceae; g__Clostridium; s__	0.00695109	8.22314	0.12651	0.000138311	2.89954e-05
k__Bacteria; p__Firmicutes; c__Clostridia; o__Clostridiales; f__Veillonellaceae; g__Veillonella; s__	0.007008	8.29046	0.125613	0.00180156	0.00656892
k__Bacteria; p__Firmicutes; c__Clostridia; o__Clostridiales; f__Lachnospiraceae; g__Coprococcus; s__	0.00705461	8.3456	0.124561	5.5332e-05	5.48996e-06
k__Bacteria; p__Firmicutes; c__Clostridia; o__Clostridiales; f__Lachnospiraceae; g__Coprococcus; s__	0.00736868	8.71715	0.128193	5.49228e-05	3.04794e-06
k__Bacteria; p__Firmicutes; c__Clostridia; o__Clostridiales; f__Lachnospiraceae; g__Clostridium; s__	0.00741082	8.767	0.127058	0.000107485	2.97113e-05
k__Bacteria; p__Firmicutes; c__Bacilli; o__Gemellales; f__Gemellaceae; g__Gemella; s__	0.0075211	8.89747	0.127107	0.000104384	0.000472424
k__Bacteria; p__Firmicutes; c__Clostridia; o__Clostridiales; f__Lachnospiraceae; g__Clostridium; s__	0.00753657	8.91576	0.125574	3.87521e-06	4.03991e-05
k__Bacteria; p__Firmicutes; c__Bacilli; o__Lactobacillales; f__Streptococcaceae; g__Streptococcus; s__	0.00808763	9.56767	0.132884	4.07428e-05	0.000131308
k__Bacteria; p__Firmicutes; c__Clostridia; o__Clostridiales; f__Ruminococcaceae; g__; s__	0.00860671	10.1817	0.139476	1.5296e-05	0.000237151
k__Bacteria; p__Firmicutes; c__Clostridia; o__Clostridiales; f__Ruminococcaceae; g__; s__	0.0086142	10.1906	0.137711	6.49164e-05	1.93782e-06
k__Bacteria; p__Tenericutes; c__Erysipelotrichi; o__Erysipelotrichales; f__Erysipelotrichaceae; g__Clostridium; s__	0.00864754	10.23	0.1364	0.00481151	0.00123125
k__Bacteria; p__Firmicutes; c__Clostridia; o__Clostridiales; f__Ruminococcaceae; g__; s__	0.00870421	10.2971	0.135488	0.000514626	0.000150608
k__Bacteria; p__Firmicutes; c__Clostridia; o__Clostridiales; f__Lachnospiraceae; g__; s__	0.0090137	10.6632	0.138483	0.000908258	0.00030753
k__Bacteria; p__Firmicutes; c__Clostridia; o__Clostridiales; f__Lachnospiraceae; g__; s__	0.00926928	10.9656	0.140584	0.000815119	0.00251919
k__Bacteria; p__Firmicutes; c__Clostridia; o__Clostridiales; f__Lachnospiraceae; g__Ruminococcus; s__Ruminococcustorques	0.00946609	11.1984	0.141752	0.0365737	0.0123121
k__Bacteria; p__Bacteroidetes; c__Bacteroidia; o__Bacteroidales; f__Rikenellaceae; g__Alistipes; s__	0.00973783	11.5199	0.143998	6.58415e-05	0.000370598
k__Bacteria; p__Firmicutes; c__Clostridia; o__Clostridiales; f__Lachnospiraceae; g__Coprococcus; s__	0.0098119	11.6075	0.143302	0.00232351	0.000399163
k__Bacteria; p__Firmicutes; c__Clostridia; o__Clostridiales; f__Lachnospiraceae; g__; s__	0.00981366	11.6096	0.14158	2.46968e-05	0.000236293
k__Bacteria; p__Firmicutes; c__Clostridia; o__Clostridiales; f__Lachnospiraceae; g__Ruminococcus; s__Ruminococcustorques	0.00990894	11.7223	0.141232	0.0016135	0.000569167
k__Bacteria; p__Firmicutes; c__Bacilli; o__Lactobacillales; f__Enterococcaceae; g__Enterococcus; s__	0.0100129	11.8452	0.141015	2.45993e-05	0.000520829
k__Bacteria; p__Firmicutes; c__Clostridia; o__Clostridiales; f__Lachnospiraceae; g__Clostridium; s__	0.0108674	12.8561	0.151248	8.22008e-06	6.74694e-05
k__Bacteria; p__Firmicutes; c__Clostridia; o__Clostridiales; f__Lachnospiraceae; g__; s__	0.0108853	12.8774	0.149737	0.000163839	2.02895e-05
k__Bacteria; p__Firmicutes; c__Clostridia; o__Clostridiales; f__Ruminococcaceae; g__; s__	0.0110824	13.1105	0.150695	4.24779e-05	0.000105572
No blast hit	0.0115952	13.7171	0.155876	0.000674451	0.00359038
k__Bacteria; p__Firmicutes; c__Clostridia; o__Clostridiales; f__Ruminococcaceae; g__; s__	0.0117627	13.9152	0.156351	0.000125313	2.45875e-05
k__Bacteria; p__Firmicutes; c__Clostridia; o__Clostridiales; f__Lachnospiraceae; g__Ruminococcus; s__Ruminococcustorques	0.011941	14.1263	0.156958	3.61618e-05	0
k__Bacteria; p__Firmicutes; c__Clostridia; o__Clostridiales; f__Ruminococcaceae; g__Ruminococcus; s__	0.0124015	14.671	0.161219	0.000549887	0.00272201
k__Bacteria; p__Tenericutes; c__Erysipelotrichi; o__Erysipelotrichales; f__Erysipelotrichaceae; g__; s__Eubacteriumcylindroides	0.0124671	14.7486	0.160311	0.000450478	0.0102709
k__Bacteria; p__Firmicutes; c__Clostridia; o__Clostridiales; f__Ruminococcaceae; g__; s__	0.0125285	14.8212	0.159368	0.00137475	6.98695e-05
k__Bacteria; p__Tenericutes; c__Erysipelotrichi; o__Erysipelotrichales; f__Erysipelotrichaceae; g__Coprobacillus; s__	0.0129413	15.3096	0.162868	1.64367e-05	6.64995e-05
k__Bacteria; p__Firmicutes; c__Clostridia; o__Clostridiales; f__Ruminococcaceae; g__Oscillospira; s__	0.0131338	15.5373	0.163551	0.000822745	1.93205e-05
k__Bacteria; p__Firmicutes; c__Clostridia; o__Clostridiales; f__Ruminococcaceae; g__; s__	0.0131846	15.5974	0.162473	7.21819e-05	0.000323189
k__Bacteria; p__Firmicutes; c__Clostridia; o__Clostridiales; f__Ruminococcaceae; g__Clostridium; s__	0.0132486	15.6731	0.161579	0.000134623	4.20368e-05
k__Bacteria; p__Firmicutes; c__Clostridia; o__Clostridiales; f__Lachnospiraceae; g__Clostridium; s__	0.0132938	15.7265	0.160475	0.0057561	0.000586815
k__Bacteria; p__Bacteroidetes; c__Bacteroidia; o__Bacteroidales; f__Bacteroidaceae; g__Bacteroides; s__	0.0133072	15.7424	0.159014	9.31e-05	0.00414123
k__Bacteria; p__Bacteroidetes; c__Bacteroidia; o__Bacteroidales; f__Bacteroidaceae; g__Bacteroides; s__	0.0133124	15.7485	0.157485	9.66277e-06	3.31093e-05
k__Bacteria; p__Firmicutes; c__Clostridia; o__Clostridiales; f__Lachnospiraceae; g__; s__	0.0135413	16.0194	0.158608	5.2062e-05	0.00429932
k__Bacteria; p__Tenericutes; c__Erysipelotrichi; o__Erysipelotrichales; f__Erysipelotrichaceae; g__Holdemania; s__	0.0136021	16.0913	0.157758	5.84313e-05	0.000310657
k__Bacteria; p__Firmicutes; c__Clostridia; o__Clostridiales; f__Lachnospiraceae; g__Clostridium; s__	0.0136596	16.1593	0.156886	5.05709e-05	2.03232e-06
k__Bacteria; p__Firmicutes; c__Clostridia; o__Clostridiales; f__Lachnospiraceae; g__Blautia; s__	0.0136657	16.1665	0.155447	1.25619e-05	6.72852e-05
k__Bacteria; p__Firmicutes; c__Clostridia; o__Clostridiales; f__Lachnospiraceae; g__; s__	0.0138775	16.4171	0.156353	0.000506656	0.000117728
k__Bacteria; p__Firmicutes; c__Clostridia; o__Clostridiales; f__Lachnospiraceae; g__Blautia; s__	0.0139874	16.547	0.156104	0.000694345	0.000245028
k__Bacteria; p__Firmicutes; c__Bacilli; o__Lactobacillales; f__Streptococcaceae; g__Streptococcus; s__	0.0141062	16.6876	0.155959	2.06628e-05	0.000385383
k__Bacteria; p__Firmicutes; c__Clostridia; o__Clostridiales; f__; g__; s__	0.0141584	16.7494	0.155087	3.27812e-05	2.03232e-06
k__Bacteria; p__Bacteroidetes; c__Bacteroidia; o__Bacteroidales; f__Bacteroidaceae; g__Bacteroides; s__Bacteroidesfragilis	0.0141861	16.7822	0.153965	0.000680043	0.000257606
k__Bacteria; p__Firmicutes; c__Clostridia; o__Clostridiales; f__Ruminococcaceae; g__; s__	0.0142584	16.8676	0.153342	0.000660381	0.000281366
k__Bacteria; p__Firmicutes; c__Clostridia; o__Clostridiales; f__; g__; s__	0.0142805	16.8939	0.152197	1.76611e-05	0.000117494
k__Bacteria; p__Firmicutes; c__Clostridia; o__Clostridiales; f__Ruminococcaceae; g__; s__	0.0143596	16.9874	0.151673	0.000153388	0.000379355
k__Bacteria; p__Firmicutes; c__Clostridia; o__Clostridiales; f__Ruminococcaceae; g__Oscillospira; s__	0.014374	17.0045	0.150482	9.3728e-05	0.00270214
k__Bacteria; p__Firmicutes; c__Clostridia; o__Clostridiales; f__Ruminococcaceae; g__; s__	0.0149685	17.7077	0.155331	0.000159715	4.8821e-05
k__Bacteria; p__Firmicutes; c__Clostridia; o__Clostridiales; f__Lachnospiraceae; g__; s__	0.0151895	17.9692	0.156254	3.74224e-05	9.03611e-05
k__Bacteria; p__Bacteroidetes; c__Bacteroidia; o__Bacteroidales; f__Porphyromonadaceae; g__Parabacteroides; s__Parabacteroidesdistasonis	0.0154423	18.2682	0.157484	7.00313e-05	0.000874475
k__Bacteria; p__Tenericutes; c__Erysipelotrichi; o__Erysipelotrichales; f__Erysipelotrichaceae; g__; s__	0.0154427	18.2687	0.156143	9.09966e-05	0.000643664
k__Bacteria; p__Firmicutes; c__Clostridia; o__Clostridiales; f__Ruminococcaceae; g__Clostridium; s__	0.0161508	19.1064	0.161919	0.000181981	6.13756e-05
k__Bacteria; p__Firmicutes; c__Clostridia; o__Clostridiales; f__Lachnospiraceae; g__Anaerostipes; s__	0.0165413	19.5683	0.16444	7.78157e-05	0.000343987
k__Bacteria; p__Bacteroidetes; c__Bacteroidia; o__Bacteroidales; f__Bacteroidaceae; g__Bacteroides; s__	0.0165939	19.6305	0.163588	0.00278677	0.00190696
k__Bacteria; p__Firmicutes; c__Clostridia; o__Clostridiales; f__Ruminococcaceae; g__Oscillospira; s__	0.0168333	19.9138	0.164577	4.20002e-05	3.09294e-06
k__Bacteria; p__Firmicutes; c__Clostridia; o__Clostridiales; f__Ruminococcaceae; g__; s__	0.0171626	20.3034	0.166421	4.3407e-05	0
k__Bacteria; p__Tenericutes; c__Erysipelotrichi; o__Erysipelotrichales; f__Erysipelotrichaceae; g__Clostridium; s__	0.0172746	20.4359	0.166145	6.35073e-05	0.000269877
k__Bacteria; p__Firmicutes; c__Clostridia; o__Clostridiales; f__Veillonellaceae; g__Veillonella; s__	0.0173363	20.5089	0.165394	1.15633e-05	6.33011e-05
k__Bacteria; p__Tenericutes; c__Erysipelotrichi; o__Erysipelotrichales; f__Erysipelotrichaceae; g__Clostridium; s__	0.0177212	20.9642	0.167713	0.000329106	8.58548e-05
k__Bacteria; p__Firmicutes; c__Clostridia; o__Clostridiales; f__Lachnospiraceae; g__Blautia; s__	0.0183881	21.7531	0.172644	4.77543e-05	0
k__Bacteria; p__Tenericutes; c__Erysipelotrichi; o__Erysipelotrichales; f__Erysipelotrichaceae; g__; s__Clostridiuminnocuum	0.0185402	21.9331	0.172701	0.00282065	0.0158002
k__Bacteria; p__Firmicutes; c__Clostridia; o__Clostridiales; f__Lachnospiraceae; g__; s__	0.0190535	22.5402	0.176096	4.21824e-05	0.000139006
k__Bacteria; p__Firmicutes; c__Clostridia; o__Clostridiales; f__Lachnospiraceae; g__; s__	0.0191985	22.7118	0.17606	9.05522e-05	1.83985e-05
k__Bacteria; p__Firmicutes; c__Clostridia; o__Clostridiales; f__Lachnospiraceae; g__Ruminococcus; s__Ruminococcustorques	0.0195307	23.1048	0.177729	5.34333e-05	1.19102e-05
k__Bacteria; p__Proteobacteria; c__Gammaproteobacteria; o__Enterobacteriales; f__Enterobacteriaceae; g__; s__	0.0195962	23.1823	0.176964	0.000134353	0.000402709
k__Bacteria; p__Firmicutes; c__Clostridia; o__Clostridiales; f__Lachnospiraceae; g__Ruminococcus; s__Ruminococcustorques	0.0196149	23.2044	0.175791	0.000197894	7.43204e-05
k__Bacteria; p__Bacteroidetes; c__Bacteroidia; o__Bacteroidales; f__; g__; s__	0.0199686	23.6228	0.177615	7.98999e-06	4.99162e-05
k__Bacteria; p__Firmicutes; c__Clostridia; o__Clostridiales; f__Lachnospiraceae; g__; s__	0.0199811	23.6376	0.1764	9.33421e-06	3.73864e-05
k__Bacteria; p__Firmicutes; c__Clostridia; o__Clostridiales; f__Lachnospiraceae; g__Clostridium; s__	0.0203081	24.0245	0.177959	4.14013e-05	1.14515e-05
k__Bacteria; p__Firmicutes; c__Clostridia; o__Clostridiales; f__Lachnospiraceae; g__Blautia; s__	0.0203118	24.0289	0.176683	0.00016411	5.49825e-05
k__Bacteria; p__Firmicutes; c__Clostridia; o__Clostridiales; f__Lachnospiraceae; g__Clostridium; s__Clostridiumbolteae	0.0204098	24.1448	0.17624	4.34327e-05	0.000149357
k__Bacteria; p__Actinobacteria; c__Actinobacteria; o__Actinomycetales; f__Actinomycetaceae; g__Actinomyces; s__	0.0204566	24.2001	0.175363	5.05873e-05	0.000156246
k__Bacteria; p__Firmicutes; c__Clostridia; o__Clostridiales; f__; g__; s__	0.020555	24.3165	0.174939	0.000508276	1.7256e-05
k__Bacteria; p__Firmicutes; c__Clostridia; o__Clostridiales; f__Lachnospiraceae; g__Ruminococcus; s__Ruminococcustorques	0.0209734	24.8116	0.177226	3.56659e-05	7.10427e-06
k__Bacteria; p__Firmicutes; c__Clostridia; o__Clostridiales; f__Lachnospiraceae; g__Lachnospira; s__	0.0210161	24.862	0.176327	0.000206461	0
k__Bacteria; p__Bacteroidetes; c__Bacteroidia; o__Bacteroidales; f__Bacteroidaceae; g__Bacteroides; s__	0.0219331	25.9468	0.182724	6.8407e-05	0.00016444
k__Bacteria; p__Firmicutes; c__Clostridia; o__Clostridiales; f__Lachnospiraceae; g__; s__	0.0221702	26.2273	0.183408	3.19668e-05	0
k__Bacteria; p__Firmicutes; c__Clostridia; o__Clostridiales; f__; g__; s__	0.0221742	26.2321	0.182167	5.44339e-05	0.000276461
k__Bacteria; p__Bacteroidetes; c__Bacteroidia; o__Bacteroidales; f__Prevotellaceae; g__Prevotella; s__	0.0228009	26.9735	0.186024	8.00457e-05	0.000603178
k__Bacteria; p__Proteobacteria; c__Betaproteobacteria; o__Neisseriales; f__Neisseriaceae; g__Eikenella; s__Eikenellacorrodens	0.023031	27.2457	0.186614	8.61814e-05	8.92008e-06
k__Bacteria; p__Firmicutes; c__Clostridia; o__Clostridiales; f__Ruminococcaceae; g__Ruminococcus; s__	0.0232258	27.4761	0.186912	0.000213102	0
k__Bacteria; p__Firmicutes; c__Clostridia; o__Clostridiales; f__Ruminococcaceae; g__; s__	0.0233023	27.5666	0.186261	0.0007943	0.000396598
k__Bacteria; p__Firmicutes; c__Clostridia; o__Clostridiales; f__; g__; s__	0.0236227	27.9456	0.187554	5.21102e-05	0
k__Bacteria; p__Firmicutes; c__Clostridia; o__Clostridiales; f__Lachnospiraceae; g__Coprococcus; s__	0.0239902	28.3805	0.189203	7.37444e-05	2.21932e-05
k__Bacteria; p__Bacteroidetes; c__Bacteroidia; o__Bacteroidales; f__Bacteroidaceae; g__Bacteroides; s__Bacteroidesfragilis	0.0240599	28.4628	0.188496	2.62542e-05	0
k__Bacteria; p__Firmicutes; c__Clostridia; o__Clostridiales; f__Lachnospiraceae; g__; s__	0.0241535	28.5735	0.187984	1.79794e-05	0
k__Bacteria; p__Firmicutes; c__Clostridia; o__Clostridiales; f__Lachnospiraceae; g__; s__	0.0245054	28.9898	0.189476	3.05126e-05	4.11932e-06
k__Bacteria; p__Firmicutes; c__Clostridia; o__Clostridiales; f__Lachnospiraceae; g__Lachnobacterium; s__	0.0245217	29.0092	0.188371	2.22452e-05	7.93371e-05
k__Bacteria; p__Firmicutes; c__Clostridia; o__Clostridiales; f__Ruminococcaceae; g__Oscillospira; s__	0.0247066	29.2279	0.188567	0.000681418	0
k__Bacteria; p__Firmicutes; c__Clostridia; o__Clostridiales; f__Ruminococcaceae; g__Faecalibacterium; s__	0.0247468	29.2754	0.187663	2.89341e-05	0
k__Bacteria; p__Firmicutes; c__Clostridia; o__Clostridiales; f__Lachnospiraceae; g__Blautia; s__Blautiaproducta	0.0248617	29.4114	0.187334	5.3434e-06	2.13756e-05
k__Bacteria; p__Bacteroidetes; c__Bacteroidia; o__Bacteroidales; f__Bacteroidaceae; g__Bacteroides; s__	0.0254084	30.0581	0.190241	1.75113e-05	5.87985e-05
k__Bacteria; p__Bacteroidetes; c__Bacteroidia; o__Bacteroidales; f__Bacteroidaceae; g__Bacteroides; s__	0.025486	30.1499	0.189622	1.45726e-05	0
k__Bacteria; p__Firmicutes; c__Clostridia; o__Clostridiales; f__Ruminococcaceae; g__; s__	0.0256933	30.3952	0.18997	7.87156e-05	1.7962e-05
k__Bacteria; p__Firmicutes; c__Clostridia; o__Clostridiales; f__Ruminococcaceae; g__; s__	0.0257899	30.5094	0.1895	3.09262e-05	0
k__Bacteria; p__Proteobacteria; c__Gammaproteobacteria; o__Enterobacteriales; f__Enterobacteriaceae; g__; s__	0.0261474	30.9324	0.190941	1.40989e-05	8.54818e-05
k__Bacteria; p__Firmicutes; c__Clostridia; o__Clostridiales; f__Lachnospiraceae; g__Blautia; s__	0.0261815	30.9727	0.190016	3.6042e-05	0
k__Bacteria; p__Bacteroidetes; c__Bacteroidia; o__Bacteroidales; f__Bacteroidaceae; g__Bacteroides; s__	0.0265333	31.3888	0.191395	6.5839e-05	8.69495e-06
k__Bacteria; p__Firmicutes; c__Clostridia; o__Clostridiales; f__Lachnospiraceae; g__Ruminococcus; s__Ruminococcustorques	0.0268454	31.7581	0.192473	0.000488881	0.000211901
k__Bacteria; p__Firmicutes; c__Clostridia; o__Clostridiales; f__Lachnospiraceae; g__; s__	0.0272427	32.2281	0.194145	2.33105e-05	0
k__Bacteria; p__Bacteroidetes; c__Bacteroidia; o__Bacteroidales; f__Bacteroidaceae; g__Bacteroides; s__	0.0274647	32.4907	0.194555	3.97745e-05	8.55246e-06
k__Bacteria; p__Bacteroidetes; c__Bacteroidia; o__Bacteroidales; f__Porphyromonadaceae; g__Parabacteroides; s__	0.0276339	32.6909	0.194589	2.5725e-05	0
k__Bacteria; p__Firmicutes; c__Clostridia; o__Clostridiales; f__Lachnospiraceae; g__Clostridium; s__Clostridiumbolteae	0.0277932	32.8793	0.194552	0.00325845	0.00933568
k__Bacteria; p__Firmicutes; c__Clostridia; o__Clostridiales; f__Ruminococcaceae; g__; s__	0.0281398	33.2894	0.19582	5.344e-05	3.55213e-06
k__Bacteria; p__Firmicutes; c__Clostridia; o__Clostridiales; f__Ruminococcaceae; g__Oscillospira; s__	0.0282113	33.374	0.19517	0.000971629	0.000354311
k__Bacteria; p__Firmicutes; c__Clostridia; o__Clostridiales; f__Lachnospiraceae; g__; s__	0.0285188	33.7378	0.19615	6.20261e-05	1.72698e-05
k__Bacteria; p__Firmicutes; c__Clostridia; o__Clostridiales; f__; g__; s__	0.0285227	33.7423	0.195042	4.27232e-05	0
k__Bacteria; p__Firmicutes; c__Clostridia; o__Clostridiales; f__Lachnospiraceae; g__; s__	0.0285697	33.7979	0.194241	5.88973e-05	1.13136e-05
k__Bacteria; p__Firmicutes; c__Clostridia; o__Clostridiales; f__Veillonellaceae; g__Dialister; s__	0.028643	33.8846	0.193627	0.000569014	4.98577e-06
k__Bacteria; p__Firmicutes; c__Clostridia; o__Clostridiales; f__Ruminococcaceae; g__; s__	0.0286815	33.9302	0.192785	9.45233e-05	0
k__Bacteria; p__Actinobacteria; c__Actinobacteria; o__Bifidobacteriales; f__Bifidobacteriaceae; g__Bifidobacterium; s__	0.0286996	33.9517	0.191817	6.79568e-05	0.00113109
k__Bacteria; p__Proteobacteria; c__Gammaproteobacteria; o__Enterobacteriales; f__Enterobacteriaceae; g__; s__	0.0287241	33.9806	0.190902	1.28983e-05	5.87718e-05
k__Bacteria; p__Firmicutes; c__Clostridia; o__Clostridiales; f__Lachnospiraceae; g__Clostridium; s__	0.0290786	34.4	0.192179	5.88554e-05	0.000293844
k__Bacteria; p__Firmicutes; c__Clostridia; o__Clostridiales; f__Ruminococcaceae; g__Clostridium; s__	0.0293299	34.6973	0.192763	0.00558989	0.00347281
k__Bacteria; p__Bacteroidetes; c__Bacteroidia; o__Bacteroidales; f__Bacteroidaceae; g__Bacteroides; s__Bacteroidesfragilis	0.029621	35.0417	0.1936	1.55774e-05	0
k__Bacteria; p__Firmicutes; c__Clostridia; o__Clostridiales; f__; g__; s__	0.0305733	36.1682	0.198726	0.00142454	0
k__Bacteria; p__Firmicutes; c__Clostridia; o__Clostridiales; f__Lachnospiraceae; g__Roseburia; s__	0.0308024	36.4392	0.199121	7.53832e-05	0.000257452
k__Bacteria; p__Proteobacteria; c__Gammaproteobacteria; o__Enterobacteriales; f__Enterobacteriaceae; g__; s__	0.031137	36.8351	0.200191	3.60717e-05	0.000102938
k__Bacteria; p__Firmicutes; c__Clostridia; o__Clostridiales; f__Lachnospiraceae; g__Ruminococcus; s__	0.0313176	37.0487	0.200263	0.0108695	0.00421211
k__Bacteria; p__Firmicutes; c__Clostridia; o__Clostridiales; f__Lachnospiraceae; g__Clostridium; s__	0.0314064	37.1537	0.199751	0.000392734	0.000161282
k__Bacteria; p__Firmicutes; c__Clostridia; o__Clostridiales; f__Veillonellaceae; g__; s__	0.0317418	37.5506	0.200805	0.000786163	3.01002e-05
k__Bacteria; p__Proteobacteria; c__Gammaproteobacteria; o__Enterobacteriales; f__Enterobacteriaceae; g__Plesiomonas; s__Plesiomonasshigelloides	0.0318542	37.6835	0.200444	3.56823e-05	9.20167e-05
k__Bacteria; p__Firmicutes; c__Clostridia; o__Clostridiales; f__Ruminococcaceae; g__; s__	0.0321517	38.0355	0.201246	5.41509e-05	4.74221e-06
k__Bacteria; p__Firmicutes; c__Clostridia; o__Clostridiales; f__Lachnospiraceae; g__Clostridium; s__	0.0331611	39.2296	0.206472	0.000131756	5.91024e-05
k__Bacteria; p__Proteobacteria; c__Gammaproteobacteria; o__Enterobacteriales; f__Enterobacteriaceae; g__; s__	0.0334497	39.571	0.207178	0.00195725	0.00495958
k__Bacteria; p__Firmicutes; c__Clostridia; o__Clostridiales; f__Ruminococcaceae; g__Faecalibacterium; s__	0.0338171	40.0056	0.208363	1.937e-05	0
k__Bacteria; p__Firmicutes; c__Clostridia; o__Clostridiales; f__Lachnospiraceae; g__Blautia; s__	0.0341302	40.3761	0.209202	0.00042837	4.98577e-06
k__Bacteria; p__Firmicutes; c__Clostridia; o__Clostridiales; f__Lachnospiraceae; g__Clostridium; s__	0.0342791	40.5522	0.209032	9.42919e-05	0
k__Bacteria; p__Bacteroidetes; c__Bacteroidia; o__Bacteroidales; f__Bacteroidaceae; g__Bacteroides; s__Bacteroidesfragilis	0.0352954	41.7545	0.214126	2.3916e-05	0
k__Bacteria; p__Firmicutes; c__Clostridia; o__Clostridiales; f__Lachnospiraceae; g__Ruminococcus; s__	0.0358637	42.4267	0.216463	0.000882486	0.00242145
k__Bacteria; p__Firmicutes; c__Clostridia; o__Clostridiales; f__Lachnospiraceae; g__; s__	0.0360403	42.6357	0.216425	2.02518e-05	0.000134329
k__Bacteria; p__Firmicutes; c__Clostridia; o__Clostridiales; f__Lachnospiraceae; g__Blautia; s__Blautiaproducta	0.036559	43.2493	0.218431	0.000293844	0.000588883
k__Bacteria; p__Firmicutes; c__Clostridia; o__Clostridiales; f__Lachnospiraceae; g__Ruminococcus; s__	0.0369479	43.7094	0.219645	2.82013e-05	2.03232e-06
k__Bacteria; p__Firmicutes; c__Clostridia; o__Clostridiales; f__Lachnospiraceae; g__Clostridium; s__	0.037033	43.81	0.21905	0.00460733	0.0130283
k__Bacteria; p__Bacteroidetes; c__Bacteroidia; o__Bacteroidales; f__Bacteroidaceae; g__Bacteroides; s__Bacteroidesuniformis	0.0372767	44.0983	0.219395	0.000117716	0.00022222
k__Bacteria; p__Proteobacteria; c__Betaproteobacteria; o__Burkholderiales; f__Oxalobacteraceae; g__; s__	0.0373371	44.1698	0.218663	3.29831e-05	8.51958e-05
k__Bacteria; p__Firmicutes; c__Clostridia; o__Clostridiales; f__Lachnospiraceae; g__Ruminococcus; s__	0.0376173	44.5012	0.219218	0.00132807	0.00052489
k__Bacteria; p__Firmicutes; c__Clostridia; o__Clostridiales; f__Lachnospiraceae; g__; s__	0.037734	44.6393	0.21882	4.70094e-05	0
k__Bacteria; p__Proteobacteria; c__Gammaproteobacteria; o__Enterobacteriales; f__Enterobacteriaceae; g__; s__	0.0379235	44.8634	0.218846	3.60953e-05	0.000121294
k__Bacteria; p__Firmicutes; c__Clostridia; o__Clostridiales; f__Lachnospiraceae; g__Ruminococcus; s__	0.0380096	44.9653	0.218278	5.47157e-05	2.42982e-06
k__Bacteria; p__Firmicutes; c__Clostridia; o__Clostridiales; f__Lachnospiraceae; g__Ruminococcus; s__Ruminococcustorques	0.0382195	45.2137	0.218424	6.7841e-05	2.56338e-05
k__Bacteria; p__Firmicutes; c__Clostridia; o__Clostridiales; f__Ruminococcaceae; g__Faecalibacterium; s__	0.0387454	45.8358	0.220364	0.000117921	3.23644e-05
k__Bacteria; p__Tenericutes; c__Erysipelotrichi; o__Erysipelotrichales; f__Erysipelotrichaceae; g__; s__Clostridiuminnocuum	0.0387853	45.883	0.219536	1.11324e-05	6.64078e-05
k__Bacteria; p__Firmicutes; c__Clostridia; o__Clostridiales; f__Ruminococcaceae; g__; s__	0.0391919	46.364	0.220781	5.58977e-05	9.97993e-06
k__Bacteria; p__Firmicutes; c__Clostridia; o__Clostridiales; f__Ruminococcaceae; g__Faecalibacterium; s__	0.0394777	46.7021	0.221337	1.1695e-05	3.5693e-05
k__Bacteria; p__Bacteroidetes; c__Bacteroidia; o__Bacteroidales; f__Bacteroidaceae; g__Bacteroides; s__	0.0397221	46.9913	0.221657	0.000111079	1.26328e-05
k__Bacteria; p__Firmicutes; c__Clostridia; o__Clostridiales; f__; g__; s__	0.0404503	47.8527	0.22466	0.000117415	0
k__Bacteria; p__Bacteroidetes; c__Bacteroidia; o__Bacteroidales; f__Rikenellaceae; g__Alistipes; s__	0.0404844	47.893	0.223799	0.000868649	0.00163692
k__Bacteria; p__Firmicutes; c__Clostridia; o__Clostridiales; f__Ruminococcaceae; g__; s__	0.0405051	47.9176	0.222872	6.26533e-05	1.85553e-05
k__Bacteria; p__Bacteroidetes; c__Bacteroidia; o__Bacteroidales; f__Bacteroidaceae; g__Bacteroides; s__	0.0408412	48.3151	0.223681	0.000617293	0.000142016
k__Bacteria; p__Bacteroidetes; c__Bacteroidia; o__Bacteroidales; f__Bacteroidaceae; g__Bacteroides; s__Bacteroidesfragilis	0.0411706	48.7048	0.224446	0.000302171	0.000127545
k__Bacteria; p__Firmicutes; c__Clostridia; o__Clostridiales; f__Lachnospiraceae; g__Clostridium; s__	0.0419328	49.6065	0.227553	4.42675e-05	0.000134718
k__Bacteria; p__Bacteroidetes; c__Bacteroidia; o__Bacteroidales; f__Prevotellaceae; g__Prevotella; s__	0.0421072	49.8129	0.227456	0.00147828	0.006706
k__Bacteria; p__Firmicutes; c__Clostridia; o__Clostridiales; f__Lachnospiraceae; g__; s__	0.042495	50.2716	0.228507	1.66167e-05	0
k__Bacteria; p__Firmicutes; c__Clostridia; o__Clostridiales; f__Ruminococcaceae; g__Faecalibacterium; s__	0.0425386	50.3231	0.227706	5.1324e-05	2.53746e-06
k__Bacteria; p__Bacteroidetes; c__Bacteroidia; o__Bacteroidales; f__Bacteroidaceae; g__Bacteroides; s__	0.0426104	50.4081	0.227064	2.10101e-05	6.60309e-05
k__Bacteria; p__Firmicutes; c__Clostridia; o__Clostridiales; f__Lachnospiraceae; g__; s__	0.0426585	50.465	0.2263	0.00019446	0
k__Bacteria; p__Proteobacteria; c__Gammaproteobacteria; o__Enterobacteriales; f__Enterobacteriaceae; g__; s__	0.0442754	52.3778	0.23383	2.99522e-05	0.000114372
k__Bacteria; p__Proteobacteria; c__Deltaproteobacteria; o__Desulfovibrionales; f__Desulfovibrionaceae; g__LE30; s__	0.044923	53.1439	0.236195	1.04501e-05	0.000122914
k__Bacteria; p__Proteobacteria; c__Gammaproteobacteria; o__Enterobacteriales; f__Enterobacteriaceae; g__; s__	0.0466963	55.2418	0.244433	0.00130536	0.00321911
k__Bacteria; p__Firmicutes; c__Clostridia; o__Clostridiales; f__Lachnospiraceae; g__Blautia; s__Blautiaproducta	0.046963	55.5572	0.244745	0.000343619	0.00066862
k__Bacteria; p__Firmicutes; c__Clostridia; o__Clostridiales; f__Lachnospiraceae; g__Ruminococcus; s__	0.0473665	56.0346	0.245766	0.000107268	0.000238124
k__Bacteria; p__Firmicutes; c__Clostridia; o__Clostridiales; f__Ruminococcaceae; g__; s__	0.0474785	56.167	0.245271	3.76912e-05	8.97854e-05
k__Bacteria; p__Firmicutes; c__Clostridia; o__Clostridiales; f__Lachnospiraceae; g__; s__	0.0477719	56.5142	0.245714	0.00157632	0.000224778
k__Bacteria; p__Firmicutes; c__Clostridia; o__Clostridiales; f__Ruminococcaceae; g__Clostridium; s__	0.047969	56.7473	0.245659	1.87629e-05	6.40114e-05
k__Bacteria; p__Proteobacteria; c__Gammaproteobacteria; o__Enterobacteriales; f__Enterobacteriaceae; g__Rahnella; s__	0.0479882	56.77	0.244698	1.0714e-05	4.15097e-05
k__Bacteria; p__Firmicutes; c__Clostridia; o__Clostridiales; f__Lachnospiraceae; g__Blautia; s__	0.0482162	57.0398	0.244806	1.12427e-05	4.12748e-05
k__Bacteria; p__Synergistetes; c__Synergistia; o__Synergistales; f__Synergistaceae; g__Cloacibacillus; s__	0.0482746	57.1088	0.244055	9.51298e-05	0.000619432
k__Bacteria; p__Bacteroidetes; c__Bacteroidia; o__Bacteroidales; f__; g__; s__	0.0492649	58.2804	0.248002	2.45733e-05	5.99568e-05
k__Bacteria; p__Firmicutes; c__Clostridia; o__Clostridiales; f__Lachnospiraceae; g__; s__	0.0497344	58.8358	0.249304	4.97444e-05	0
k__Bacteria; p__Firmicutes; c__Clostridia; o__Clostridiales; f__Lachnospiraceae; g__; s__	0.0500222	59.1763	0.249689	9.61227e-06	2.90109e-05
k__Bacteria; p__Firmicutes; c__Clostridia; o__Clostridiales; f__Lachnospiraceae; g__Blautia; s__	0.0500494	59.2084	0.248775	0.00513702	0.00181655
k__Bacteria; p__Firmicutes; c__Clostridia; o__Clostridiales; f__Lachnospiraceae; g__Blautia; s__	0.0500976	59.2655	0.247973	1.92174e-05	2.53746e-06
k__Bacteria; p__Firmicutes; c__Clostridia; o__Clostridiales; f__Lachnospiraceae; g__; s__	0.0501159	59.2871	0.24703	0.000585538	0
k__Bacteria; p__Firmicutes; c__Clostridia; o__Clostridiales; f__Lachnospiraceae; g__Clostridium; s__	0.0502078	59.3959	0.246456	0.000131918	0.000316421
k__Bacteria; p__Firmicutes; c__Clostridia; o__Clostridiales; f__Ruminococcaceae; g__; s__	0.0502086	59.3968	0.245441	0.000123462	0
k__Bacteria; p__Firmicutes; c__Clostridia; o__Clostridiales; f__Veillonellaceae; g__Veillonella; s__Veillonellaparvula	0.0504459	59.6775	0.245586	0.000761477	0.00159214
k__Bacteria; p__Firmicutes; c__Clostridia; o__Clostridiales; f__Lachnospiraceae; g__; s__	0.0505923	59.8506	0.24529	3.86669e-05	0.000276533
k__Bacteria; p__Firmicutes; c__Clostridia; o__Clostridiales; f__Veillonellaceae; g__; s__	0.0506731	59.9463	0.244679	0.000164134	0.000779588
k__Bacteria; p__Proteobacteria; c__Gammaproteobacteria; o__Enterobacteriales; f__Enterobacteriaceae; g__; s__	0.050759	60.0479	0.244097	1.59905e-05	4.70502e-05
k__Bacteria; p__Firmicutes; c__Clostridia; o__Clostridiales; f__Lachnospiraceae; g__Ruminococcus; s__	0.0509723	60.3002	0.244131	0.00196155	0.000823874
k__Bacteria; p__Firmicutes; c__Clostridia; o__Clostridiales; f__Ruminococcaceae; g__Oscillospira; s__	0.0514121	60.8205	0.245244	2.35747e-05	2.83435e-06
k__Bacteria; p__Bacteroidetes; c__Bacteroidia; o__Bacteroidales; f__Bacteroidaceae; g__Bacteroides; s__	0.0515824	61.022	0.245068	0.000152998	8.32088e-05
k__Bacteria; p__Firmicutes; c__Clostridia; o__Clostridiales; f__Lachnospiraceae; g__Coprococcus; s__	0.0518239	61.3077	0.245231	6.98211e-05	0.000517006
k__Bacteria; p__Firmicutes; c__Clostridia; o__Clostridiales; f__Lachnospiraceae; g__Clostridium; s__	0.0518546	61.3439	0.244398	0.000117323	4.44292e-05
k__Bacteria; p__Firmicutes; c__Clostridia; o__Clostridiales; f__Lachnospiraceae; g__Clostridium; s__	0.0520153	61.5342	0.244183	0.000111994	1.98897e-05
k__Bacteria; p__Firmicutes; c__Clostridia; o__Clostridiales; f__Lachnospiraceae; g__; s__	0.0521866	61.7367	0.244019	3.33927e-05	0
k__Bacteria; p__Firmicutes; c__Clostridia; o__Clostridiales; f__Ruminococcaceae; g__; s__	0.0524485	62.0465	0.244278	6.16882e-05	0.000521252
k__Bacteria; p__Firmicutes; c__Clostridia; o__Clostridiales; f__Lachnospiraceae; g__; s__	0.0531332	62.8566	0.246497	0.00207549	0.000795125
k__Bacteria; p__Firmicutes; c__Clostridia; o__Clostridiales; f__Lachnospiraceae; g__Ruminococcus; s__Ruminococcustorques	0.0533993	63.1713	0.246763	2.09441e-05	3.17833e-06
k__Bacteria; p__Firmicutes; c__Clostridia; o__Clostridiales; f__Ruminococcaceae; g__; s__	0.0536101	63.4207	0.246773	6.45644e-05	0
k__Bacteria; p__Firmicutes; c__Clostridia; o__Clostridiales; f__Catabacteriaceae; g__; s__	0.053748	63.5839	0.246449	1.30298e-05	5.42512e-05
k__Bacteria; p__Firmicutes; c__Clostridia; o__Clostridiales; f__Lachnospiraceae; g__; s__	0.0538935	63.756	0.246162	2.32203e-05	0
k__Bacteria; p__Firmicutes; c__Clostridia; o__Clostridiales; f__Lachnospiraceae; g__Coprococcus; s__Coprococcuseutactus	0.0545915	64.5817	0.248391	3.71904e-05	0
k__Bacteria; p__Tenericutes; c__Erysipelotrichi; o__Erysipelotrichales; f__Erysipelotrichaceae; g__; s__Clostridiuminnocuum	0.0552182	65.3232	0.25028	8.79491e-06	2.99023e-05
k__Bacteria; p__Firmicutes; c__Clostridia; o__Clostridiales; f__Clostridiaceae; g__Clostridium; s__	0.0559163	66.149	0.252477	0.000358003	8.20917e-05
k__Bacteria; p__Proteobacteria; c__Gammaproteobacteria; o__Enterobacteriales; f__Enterobacteriaceae; g__; s__	0.056213	66.4999	0.252851	0.00118552	0.00289837
k__Bacteria; p__Bacteroidetes; c__Bacteroidia; o__Bacteroidales; f__Bacteroidaceae; g__Bacteroides; s__	0.0563307	66.6392	0.252421	0.0269804	0.00808191
k__Bacteria; p__Firmicutes; c__Clostridia; o__Clostridiales; f__Ruminococcaceae; g__Faecalibacterium; s__	0.0563637	66.6782	0.251616	3.39427e-05	1.16688e-05
k__Bacteria; p__Firmicutes; c__Clostridia; o__Clostridiales; f__Lachnospiraceae; g__; s__	0.0564587	66.7907	0.251093	0.000139998	0.000366887
k__Bacteria; p__Firmicutes; c__Clostridia; o__Clostridiales; f__Lachnospiraceae; g__; s__	0.0565704	66.9228	0.250647	0.000128581	4.46353e-05
k__Bacteria; p__Proteobacteria; c__Deltaproteobacteria; o__Desulfovibrionales; f__Desulfovibrionaceae; g__Desulfovibrio; s__Desulfovibriodesulfuricans	0.0566485	67.0152	0.250057	0.000288139	0
k__Bacteria; p__Firmicutes; c__Clostridia; o__Clostridiales; f__Ruminococcaceae; g__Faecalibacterium; s__	0.0568586	67.2637	0.250051	4.56398e-05	2.77814e-06
k__Bacteria; p__Firmicutes; c__Clostridia; o__Clostridiales; f__Ruminococcaceae; g__Faecalibacterium; s__	0.0570801	67.5258	0.250096	0.00149079	0.000286982
k__Bacteria; p__Bacteroidetes; c__Bacteroidia; o__Bacteroidales; f__Porphyromonadaceae; g__Parabacteroides; s__	0.0579456	68.5496	0.252951	0.00086233	0
k__Bacteria; p__Bacteroidetes; c__Bacteroidia; o__Bacteroidales; f__Bacteroidaceae; g__Bacteroides; s__Bacteroidesfragilis	0.0580193	68.6368	0.252341	4.03223e-05	1.19013e-05
k__Bacteria; p__Proteobacteria; c__Gammaproteobacteria; o__Pasteurellales; f__Pasteurellaceae; g__; s__	0.0580725	68.6997	0.251647	3.97097e-05	2.53746e-06
k__Bacteria; p__Bacteroidetes; c__Bacteroidia; o__Bacteroidales; f__Bacteroidaceae; g__Bacteroides; s__Bacteroidescaccae	0.0587561	69.5084	0.25368	0.00560276	0.0101365
k__Bacteria; p__Firmicutes; c__Clostridia; o__Clostridiales; f__ClostridialesFamilyXIII.IncertaeSedis; g__; s__	0.0592393	70.0801	0.254837	0.000362121	0
k__Bacteria; p__Firmicutes; c__Clostridia; o__Clostridiales; f__Clostridiaceae; g__Clostridium; s__	0.0595042	70.3935	0.255049	9.43246e-05	5.78957e-06
k__Bacteria; p__Firmicutes; c__Clostridia; o__Clostridiales; f__Veillonellaceae; g__Dialister; s__Dialisterinvisus	0.0597204	70.6492	0.255051	0.0031607	0.00714381
k__Bacteria; p__Fusobacteria; c__Fusobacteria; o__Fusobacteriales; f__Fusobacteriaceae; g__Leptotrichia; s__	0.0613634	72.5929	0.261126	6.45141e-05	2.12362e-06
k__Bacteria; p__Firmicutes; c__Clostridia; o__Clostridiales; f__Ruminococcaceae; g__; s__	0.0615598	72.8253	0.261022	8.87061e-05	0
k__Bacteria; p__Firmicutes; c__Clostridia; o__Clostridiales; f__Lachnospiraceae; g__; s__	0.0615696	72.8369	0.260132	3.44199e-05	5.5226e-06
k__Bacteria; p__Bacteroidetes; c__Bacteroidia; o__Bacteroidales; f__Rikenellaceae; g__Alistipes; s__	0.0620212	73.3711	0.261107	9.46274e-06	3.20023e-05
k__Bacteria; p__Bacteroidetes; c__Bacteroidia; o__Bacteroidales; f__Bacteroidaceae; g__Bacteroides; s__	0.0621358	73.5066	0.260662	2.40157e-05	6.32694e-05
k__Bacteria; p__Proteobacteria; c__Gammaproteobacteria; o__Enterobacteriales; f__Enterobacteriaceae; g__; s__	0.0622926	73.6921	0.260396	0.0188842	0.0441787
k__Bacteria; p__Proteobacteria; c__Gammaproteobacteria; o__Enterobacteriales; f__Enterobacteriaceae; g__; s__	0.0624769	73.9102	0.260247	1.82886e-05	5.46121e-05
k__Bacteria; p__Firmicutes; c__Clostridia; o__Clostridiales; f__Lachnospiraceae; g__Clostridium; s__	0.0626221	74.082	0.259937	0.000506335	0.00105357
k__Bacteria; p__Firmicutes; c__Clostridia; o__Clostridiales; f__Veillonellaceae; g__Veillonella; s__	0.062908	74.4202	0.26021	4.08754e-05	0.000105474
k__Bacteria; p__Bacteroidetes; c__Bacteroidia; o__Bacteroidales; f__Rikenellaceae; g__Alistipes; s__	0.0632604	74.8371	0.260756	5.34891e-05	0.000149107
k__Bacteria; p__Firmicutes; c__Clostridia; o__Clostridiales; f__Lachnospiraceae; g__; s__	0.0632801	74.8603	0.259932	2.93372e-05	3.59719e-06
k__Bacteria; p__Actinobacteria; c__Actinobacteria; o__Bifidobacteriales; f__Bifidobacteriaceae; g__Bifidobacterium; s__Bifidobacteriumpseudocatenulatum	0.0637417	75.4064	0.260922	3.11002e-05	9.44396e-05
k__Bacteria; p__Bacteroidetes; c__Bacteroidia; o__Bacteroidales; f__Bacteroidaceae; g__Bacteroides; s__Bacteroidesfragilis	0.0638085	75.4854	0.260295	3.11174e-05	5.14282e-06
k__Bacteria; p__Firmicutes; c__Clostridia; o__Clostridiales; f__Lachnospiraceae; g__; s__	0.0639327	75.6324	0.259905	0.00016863	0.000346165
k__Bacteria; p__Firmicutes; c__Clostridia; o__Clostridiales; f__Ruminococcaceae; g__Faecalibacterium; s__	0.0640084	75.7219	0.259322	9.3949e-06	2.66797e-05
k__Bacteria; p__Firmicutes; c__Clostridia; o__Clostridiales; f__Ruminococcaceae; g__; s__	0.0641279	75.8633	0.258919	0.000166592	7.80629e-05
k__Bacteria; p__Firmicutes; c__Clostridia; o__Clostridiales; f__Lachnospiraceae; g__; s__	0.0641831	75.9286	0.258261	2.02894e-05	4.47528e-06
k__Bacteria; p__Bacteroidetes; c__Bacteroidia; o__Bacteroidales; f__Bacteroidaceae; g__Bacteroides; s__Bacteroidesplebeius	0.0642031	75.9522	0.257465	0.00190444	0.0118016
k__Bacteria; p__Firmicutes; c__Clostridia; o__Clostridiales; f__Ruminococcaceae; g__Oscillospira; s__	0.0648871	76.7614	0.259329	0.00041943	1.6722e-05
k__Bacteria; p__Proteobacteria; c__Betaproteobacteria; o__Burkholderiales; f__Alcaligenaceae; g__Sutterella; s__	0.0650041	76.8999	0.258922	8.94715e-06	3.04992e-05
k__Bacteria; p__Firmicutes; c__Clostridia; o__Clostridiales; f__Ruminococcaceae; g__; s__	0.0654859	77.4698	0.259966	6.84094e-05	0
k__Bacteria; p__Firmicutes; c__Clostridia; o__Clostridiales; f__Ruminococcaceae; g__Faecalibacterium; s__	0.0655481	77.5434	0.259342	5.82366e-05	0.000123933
k__Bacteria; p__Firmicutes; c__Clostridia; o__Clostridiales; f__Ruminococcaceae; g__; s__	0.0656622	77.6784	0.258928	0.000591005	9.90879e-06
k__Bacteria; p__Bacteroidetes; c__Bacteroidia; o__Bacteroidales; f__; g__; s__	0.0658316	77.8787	0.258733	5.52746e-06	1.76847e-05
k__Bacteria; p__Firmicutes; c__Clostridia; o__Clostridiales; f__Ruminococcaceae; g__; s__	0.0676871	80.0739	0.265145	2.24565e-05	0.00011077
k__Bacteria; p__Firmicutes; c__Clostridia; o__Clostridiales; f__Lachnospiraceae; g__Clostridium; s__	0.0679519	80.3871	0.265304	0.00018036	4.16214e-05
k__Bacteria; p__Proteobacteria; c__Betaproteobacteria; o__Burkholderiales; f__Alcaligenaceae; g__Sutterella; s__	0.0696622	82.4104	0.271087	2.94053e-05	3.36846e-06
k__Bacteria; p__Tenericutes; c__Erysipelotrichi; o__Erysipelotrichales; f__Erysipelotrichaceae; g__Clostridium; s__	0.0705618	83.4746	0.273687	3.45755e-05	7.60457e-06
k__Bacteria; p__Firmicutes; c__Clostridia; o__Clostridiales; f__Lachnospiraceae; g__; s__	0.0707502	83.6974	0.273521	8.92093e-05	0
k__Bacteria; p__Firmicutes; c__Clostridia; o__Clostridiales; f__Lachnospiraceae; g__Ruminococcus; s__Ruminococcustorques	0.0710029	83.9964	0.273604	2.09909e-05	2.03232e-06
k__Bacteria; p__Firmicutes; c__Clostridia; o__Clostridiales; f__Ruminococcaceae; g__; s__	0.0711663	84.1897	0.273343	0.000157618	4.57431e-06
k__Bacteria; p__Bacteroidetes; c__Bacteroidia; o__Bacteroidales; f__Porphyromonadaceae; g__Odoribacter; s__	0.0716357	84.745	0.274256	0.00104603	0.00180864
No blast hit	0.071777	84.9122	0.27391	9.35283e-06	2.98365e-05
k__Bacteria; p__Firmicutes; c__Clostridia; o__Clostridiales; f__Lachnospiraceae; g__Ruminococcus; s__Ruminococcustorques	0.0720316	85.2133	0.273998	0.000235188	3.19684e-05
k__Bacteria; p__Verrucomicrobia; c__Verrucomicrobiae; o__Verrucomicrobiales; f__Verrucomicrobiaceae; g__Akkermansia; s__	0.072248	85.4694	0.27394	0.00298973	0.0118254
k__Bacteria; p__Firmicutes; c__Clostridia; o__Clostridiales; f__Lachnospiraceae; g__; s__	0.0722765	85.5031	0.273173	1.25707e-05	3.68446e-05
k__Bacteria; p__Firmicutes; c__Clostridia; o__Clostridiales; f__Ruminococcaceae; g__Faecalibacterium; s__	0.0734418	86.8816	0.276693	0.000284407	0.000167569
k__Bacteria; p__Firmicutes; c__Clostridia; o__Clostridiales; f__Lachnospiraceae; g__; s__	0.0743271	87.9289	0.279139	2.00199e-05	4.30372e-05
k__Bacteria; p__Firmicutes; c__Clostridia; o__Clostridiales; f__Lachnospiraceae; g__Ruminococcus; s__	0.0748161	88.5075	0.280087	0.00144289	0.000602116
k__Bacteria; p__Firmicutes; c__Clostridia; o__Clostridiales; f__Lachnospiraceae; g__; s__	0.0748391	88.5347	0.279289	5.94371e-05	1.9316e-05
k__Bacteria; p__Firmicutes; c__Clostridia; o__Clostridiales; f__Ruminococcaceae; g__Oscillospira; s__	0.075509	89.3272	0.280903	0.000541262	0.000969714
k__Bacteria; p__Proteobacteria; c__Gammaproteobacteria; o__Enterobacteriales; f__Enterobacteriaceae; g__Rahnella; s__	0.0755322	89.3546	0.280108	0.00213614	0.00476061
k__Bacteria; p__Firmicutes; c__Clostridia; o__Clostridiales; f__Ruminococcaceae; g__; s__	0.0771346	91.2502	0.285157	2.61431e-05	5.51855e-05
k__Bacteria; p__Firmicutes; c__Clostridia; o__Clostridiales; f__Veillonellaceae; g__Phascolarctobacterium; s__	0.0771711	91.2934	0.284403	0.000259339	0
k__Bacteria; p__Firmicutes; c__Clostridia; o__Clostridiales; f__Ruminococcaceae; g__Faecalibacterium; s__	0.0772398	91.3747	0.283772	4.24614e-05	2.42982e-06
k__Bacteria; p__Proteobacteria; c__Gammaproteobacteria; o__Pasteurellales; f__Pasteurellaceae; g__; s__	0.0777456	91.9731	0.284746	1.08625e-05	3.09855e-05
k__Bacteria; p__Proteobacteria; c__Gammaproteobacteria; o__Enterobacteriales; f__Enterobacteriaceae; g__; s__	0.0781597	92.463	0.28538	1.81334e-05	4.98939e-05
k__Bacteria; p__Bacteroidetes; c__Bacteroidia; o__Bacteroidales; f__Bacteroidaceae; g__Bacteroides; s__	0.0781962	92.5061	0.284634	6.43571e-05	2.9023e-05
k__Bacteria; p__Firmicutes; c__Clostridia; o__Clostridiales; f__Lachnospiraceae; g__; s__	0.0782987	92.6273	0.284133	1.56776e-05	4.66984e-05
k__Bacteria; p__Firmicutes; c__Clostridia; o__Clostridiales; f__Lachnospiraceae; g__; s__	0.0784334	92.7867	0.283751	2.3281e-05	2.03232e-06
k__Bacteria; p__Firmicutes; c__Clostridia; o__Clostridiales; f__Lachnospiraceae; g__; s__	0.0786829	93.0819	0.283786	4.03863e-05	1.14582e-05
k__Bacteria; p__Proteobacteria; c__Gammaproteobacteria; o__Enterobacteriales; f__Enterobacteriaceae; g__Serratia; s__Serratiamarcescens	0.0787081	93.1117	0.283014	7.75991e-06	2.48947e-05
k__Bacteria; p__Firmicutes; c__Clostridia; o__Clostridiales; f__Lachnospiraceae; g__Eubacterium; s__	0.0789666	93.4175	0.283083	3.07011e-05	9.00754e-05
k__Bacteria; p__Firmicutes; c__Clostridia; o__Clostridiales; f__Lachnospiraceae; g__Clostridium; s__	0.0792623	93.7673	0.283285	3.15651e-05	3.55593e-06
k__Bacteria; p__Firmicutes; c__Clostridia; o__Clostridiales; f__Lachnospiraceae; g__Ruminococcus; s__Ruminococcustorques	0.079357	93.8794	0.282769	0.000115947	4.86446e-05
k__Bacteria; p__Firmicutes; c__Clostridia; o__Clostridiales; f__Lachnospiraceae; g__Roseburia; s__	0.0811385	95.9869	0.288249	4.91151e-05	1.5568e-05
k__Bacteria; p__Firmicutes; c__Clostridia; o__Clostridiales; f__Lachnospiraceae; g__; s__	0.0812725	96.1454	0.28786	6.21785e-05	2.06131e-05
k__Bacteria; p__Firmicutes; c__Clostridia; o__Clostridiales; f__Lachnospiraceae; g__; s__	0.0812735	96.1465	0.287004	5.09242e-05	0
k__Bacteria; p__Bacteroidetes; c__Bacteroidia; o__Bacteroidales; f__Bacteroidaceae; g__Bacteroides; s__Bacteroidesfragilis	0.0813075	96.1867	0.28627	6.83848e-05	2.30794e-05
k__Bacteria; p__Firmicutes; c__Clostridia; o__Clostridiales; f__Lachnospiraceae; g__Clostridium; s__	0.0820526	97.0682	0.288036	1.87293e-05	6.44038e-05
k__Bacteria; p__Tenericutes; c__Erysipelotrichi; o__Erysipelotrichales; f__Erysipelotrichaceae; g__Clostridium; s__	0.0820664	97.0846	0.287232	7.25684e-05	2.79377e-05
k__Bacteria; p__Proteobacteria; c__Gammaproteobacteria; o__Pseudomonadales; f__Pseudomonadaceae; g__Pseudomonas; s__	0.0824308	97.5157	0.287657	8.63814e-05	0
k__Bacteria; p__Firmicutes; c__Clostridia; o__Clostridiales; f__Ruminococcaceae; g__Oscillospira; s__	0.0825541	97.6615	0.28724	0.000226342	5.26741e-05
k__Bacteria; p__Proteobacteria; c__Gammaproteobacteria; o__Enterobacteriales; f__Enterobacteriaceae; g__; s__	0.0831638	98.3828	0.288512	0.000473056	1.36355e-05
k__Bacteria; p__Firmicutes; c__Clostridia; o__Clostridiales; f__Veillonellaceae; g__Dialister; s__	0.0832012	98.427	0.287798	0.000522936	0.00130226
k__Bacteria; p__Firmicutes; c__Clostridia; o__Clostridiales; f__Ruminococcaceae; g__; s__	0.08325	98.4848	0.287128	0.000266629	0.000143702
k__Bacteria; p__Firmicutes; c__Clostridia; o__Clostridiales; f__Ruminococcaceae; g__Ruminococcus; s__	0.0835122	98.795	0.287195	2.27328e-05	0
k__Bacteria; p__Fusobacteria; c__Fusobacteria; o__Fusobacteriales; f__Fusobacteriaceae; g__Fusobacterium; s__	0.0836195	98.9218	0.28673	5.62547e-05	5.79656e-06
k__Bacteria; p__Firmicutes; c__Clostridia; o__Clostridiales; f__Lachnospiraceae; g__; s__	0.0840289	99.4062	0.287301	2.44144e-05	5.93479e-05
k__Bacteria; p__Proteobacteria; c__Gammaproteobacteria; o__Enterobacteriales; f__Enterobacteriaceae; g__Serratia; s__	0.0842432	99.6597	0.287204	0.000414328	0.000906275
k__Bacteria; p__Firmicutes; c__Clostridia; o__Clostridiales; f__Lachnospiraceae; g__Clostridium; s__	0.084418	99.8665	0.286973	1.87639e-05	5.18862e-05
k__Bacteria; p__Firmicutes; c__Clostridia; o__Clostridiales; f__Lachnospiraceae; g__Ruminococcus; s__Ruminococcustorques	0.0845351	100.005	0.286547	3.16652e-05	1.00024e-05
k__Bacteria; p__Firmicutes; c__Clostridia; o__Clostridiales; f__Clostridiaceae; g__Clostridium; s__	0.0851088	100.684	0.287668	0.00366686	0.000907875
k__Bacteria; p__Bacteroidetes; c__Bacteroidia; o__Bacteroidales; f__Bacteroidaceae; g__Bacteroides; s__Bacteroidesfragilis	0.0851591	100.743	0.287018	6.0926e-05	2.66252e-05
k__Bacteria; p__Firmicutes; c__Clostridia; o__Clostridiales; f__Ruminococcaceae; g__; s__	0.0852601	100.863	0.286542	7.11408e-05	2.51718e-05
k__Bacteria; p__Firmicutes; c__Clostridia; o__Clostridiales; f__Lachnospiraceae; g__Blautia; s__	0.0859974	101.735	0.288201	3.59156e-05	0.000105576
k__Bacteria; p__Proteobacteria; c__Gammaproteobacteria; o__Pasteurellales; f__Pasteurellaceae; g__; s__BisgaardTaxon10	0.0861619	101.93	0.287936	4.37552e-05	2.42982e-06
k__Bacteria; p__Firmicutes; c__Clostridia; o__Clostridiales; f__Lachnospiraceae; g__; s__	0.0863535	102.156	0.287764	0.000186733	5.85191e-05
k__Bacteria; p__Firmicutes; c__Clostridia; o__Clostridiales; f__Ruminococcaceae; g__Faecalibacterium; s__	0.0865284	102.363	0.287537	6.97862e-05	3.23337e-05
k__Bacteria; p__Firmicutes; c__Clostridia; o__Clostridiales; f__Veillonellaceae; g__Veillonella; s__	0.0865354	102.371	0.286755	8.12365e-06	2.7058e-05
k__Bacteria; p__Proteobacteria; c__Gammaproteobacteria; o__Enterobacteriales; f__Enterobacteriaceae; g__; s__	0.0867905	102.673	0.286797	0.00167249	7.41405e-05
k__Bacteria; p__Tenericutes; c__Erysipelotrichi; o__Erysipelotrichales; f__Erysipelotrichaceae; g__; s__	0.0870055	102.927	0.286706	0.000190191	5.14282e-06
k__Bacteria; p__Firmicutes; c__Clostridia; o__Clostridiales; f__ClostridialesFamilyXI.IncertaeSedis; g__; s__Parvimonasmicra	0.0873586	103.345	0.28707	7.99149e-05	1.64528e-05
k__Bacteria; p__Bacteroidetes; c__Bacteroidia; o__Bacteroidales; f__Bacteroidaceae; g__Bacteroides; s__	0.0875983	103.629	0.28706	1.61738e-05	3.96878e-05
k__Bacteria; p__Firmicutes; c__Clostridia; o__Clostridiales; f__Lachnospiraceae; g__Ruminococcus; s__Ruminococcustorques	0.0876454	103.685	0.286421	5.53793e-05	2.4139e-05
k__Bacteria; p__Proteobacteria; c__Gammaproteobacteria; o__Enterobacteriales; f__Enterobacteriaceae; g__; s__	0.0878504	103.927	0.2863	0.00561717	0.0001759
k__Bacteria; p__Firmicutes; c__Clostridia; o__Clostridiales; f__Ruminococcaceae; g__; s__	0.0879678	104.066	0.285895	2.67347e-05	0
k__Bacteria; p__Firmicutes; c__Clostridia; o__Clostridiales; f__Lachnospiraceae; g__; s__	0.0883708	104.543	0.286418	0.0207018	0.00947784
k__Bacteria; p__Firmicutes; c__Clostridia; o__Clostridiales; f__Lachnospiraceae; g__; s__	0.0892501	105.583	0.288478	6.28504e-05	2.00327e-05
k__Bacteria; p__Firmicutes; c__Clostridia; o__Clostridiales; f__; g__; s__	0.0895421	105.928	0.288633	0.000184321	0
k__Bacteria; p__Firmicutes; c__Clostridia; o__Clostridiales; f__Lachnospiraceae; g__Eubacterium; s__	0.0901623	106.662	0.289842	8.16108e-05	2.09042e-05
k__Bacteria; p__Bacteroidetes; c__Bacteroidia; o__Bacteroidales; f__Bacteroidaceae; g__Bacteroides; s__	0.0907634	107.373	0.290984	1.22991e-05	3.00104e-05
k__Bacteria; p__Bacteroidetes; c__Bacteroidia; o__Bacteroidales; f__Porphyromonadaceae; g__; s__	0.0908457	107.47	0.290461	3.04696e-05	2.83435e-06
k__Bacteria; p__Firmicutes; c__Clostridia; o__Clostridiales; f__Lachnospiraceae; g__; s__	0.0916845	108.463	0.292352	4.63981e-05	9.03836e-05
k__Bacteria; p__Proteobacteria; c__Betaproteobacteria; o__Burkholderiales; f__Alcaligenaceae; g__Sutterella; s__Sutterellaparvirubra	0.0922393	109.119	0.293331	0.000432558	6.25877e-05
k__Bacteria; p__Proteobacteria; c__Gammaproteobacteria; o__Pasteurellales; f__Pasteurellaceae; g__; s__	0.0926205	109.57	0.293753	3.27138e-05	0.000111275
k__Bacteria; p__Bacteroidetes; c__Bacteroidia; o__Bacteroidales; f__Porphyromonadaceae; g__Parabacteroides; s__Parabacteroidesdistasonis	0.0926917	109.654	0.293193	9.73053e-06	3.36206e-05
k__Bacteria; p__Firmicutes; c__Clostridia; o__Clostridiales; f__Lachnospiraceae; g__; s__	0.0931104	110.15	0.293732	2.11367e-05	4.83664e-05
k__Bacteria; p__Firmicutes; c__Clostridia; o__Clostridiales; f__Lachnospiraceae; g__Ruminococcus; s__Ruminococcustorques	0.0938122	110.98	0.295159	2.00133e-05	3.17833e-06
k__Bacteria; p__Firmicutes; c__Clostridia; o__Clostridiales; f__Lachnospiraceae; g__; s__	0.0939072	111.092	0.294674	3.81356e-05	2.03232e-06
k__Bacteria; p__Firmicutes; c__Clostridia; o__Clostridiales; f__Lachnospiraceae; g__Ruminococcus; s__Ruminococcusgnavus	0.0941093	111.331	0.294527	0.000625394	0.000381724
k__Bacteria; p__Firmicutes; c__Clostridia; o__Clostridiales; f__Ruminococcaceae; g__Faecalibacterium; s__	0.0942167	111.458	0.294085	0.000161395	5.43296e-05
k__Bacteria; p__Firmicutes; c__Clostridia; o__Clostridiales; f__Ruminococcaceae; g__; s__	0.0942594	111.509	0.293444	0.000102497	3.25211e-06
k__Bacteria; p__Tenericutes; c__Erysipelotrichi; o__Erysipelotrichales; f__Erysipelotrichaceae; g__; s__Clostridiuminnocuum	0.0944844	111.775	0.293373	2.23544e-05	8.94495e-05
k__Bacteria; p__Firmicutes; c__Clostridia; o__Clostridiales; f__Ruminococcaceae; g__Faecalibacterium; s__	0.0965547	114.224	0.299016	0.00050912	0.000214915
k__Bacteria; p__Firmicutes; c__Clostridia; o__Clostridiales; f__Veillonellaceae; g__Phascolarctobacterium; s__	0.0968829	114.612	0.299249	2.53867e-05	6.57001e-06
k__Bacteria; p__Firmicutes; c__Clostridia; o__Clostridiales; f__Lachnospiraceae; g__Ruminococcus; s__Ruminococcustorques	0.0976962	115.575	0.300975	7.37194e-05	3.57254e-05
k__Bacteria; p__Firmicutes; c__Clostridia; o__Clostridiales; f__Lachnospiraceae; g__; s__	0.0977783	115.672	0.300446	3.23301e-05	0.00011282
k__Bacteria; p__Firmicutes; c__Clostridia; o__Clostridiales; f__Lachnospiraceae; g__; s__	0.0988208	116.905	0.302863	3.65164e-05	4.80591e-06
k__Bacteria; p__Bacteroidetes; c__Bacteroidia; o__Bacteroidales; f__Bacteroidaceae; g__Bacteroides; s__Bacteroidesfragilis	0.0988221	116.907	0.302084	1.27697e-05	4.37984e-05
k__Bacteria; p__Firmicutes; c__Clostridia; o__Clostridiales; f__Lachnospiraceae; g__Clostridium; s__	0.0992776	117.445	0.302694	0.00038729	0.000772469
k__Bacteria; p__Firmicutes; c__Clostridia; o__Clostridiales; f__Ruminococcaceae; g__Oscillospira; s__	0.100251	118.597	0.304875	6.54306e-05	1.6976e-05
k__Bacteria; p__Proteobacteria; c__Gammaproteobacteria; o__Enterobacteriales; f__Enterobacteriaceae; g__; s__	0.100495	118.886	0.304836	8.77282e-05	2.70458e-05
k__Bacteria; p__Firmicutes; c__Clostridia; o__Clostridiales; f__Lachnospiraceae; g__; s__	0.100647	119.065	0.304515	1.78696e-05	3.04794e-06
k__Bacteria; p__Proteobacteria; c__Gammaproteobacteria; o__Enterobacteriales; f__Enterobacteriaceae; g__; s__	0.101142	119.651	0.305233	0.00014347	0.000333841
k__Bacteria; p__Bacteroidetes; c__Bacteroidia; o__Bacteroidales; f__; g__; s__	0.101599	120.192	0.305832	9.48391e-05	3.59986e-05
k__Bacteria; p__Firmicutes; c__Clostridia; o__Clostridiales; f__Lachnospiraceae; g__Blautia; s__	0.102219	120.925	0.306917	5.17686e-05	2.31025e-05
k__Bacteria; p__Firmicutes; c__Clostridia; o__Clostridiales; f__Lachnospiraceae; g__; s__	0.102399	121.138	0.306678	5.62512e-05	8.1713e-06
k__Bacteria; p__Firmicutes; c__Clostridia; o__Clostridiales; f__Ruminococcaceae; g__; s__	0.102992	121.839	0.307675	7.56846e-05	1.40255e-05
k__Bacteria; p__Firmicutes; c__Clostridia; o__Clostridiales; f__Lachnospiraceae; g__Ruminococcus; s__Ruminococcusgnavus	0.103094	121.961	0.307206	1.58389e-05	1.99569e-06
k__Bacteria; p__Bacteroidetes; c__Bacteroidia; o__Bacteroidales; f__; g__; s__	0.103685	122.66	0.30819	4.75014e-05	0.000104942
k__Bacteria; p__Firmicutes; c__Clostridia; o__Clostridiales; f__Ruminococcaceae; g__; s__	0.105135	124.375	0.311717	6.71195e-05	0
k__Bacteria; p__Firmicutes; c__Clostridia; o__Clostridiales; f__Lachnospiraceae; g__; s__	0.105678	125.017	0.312543	0.000763672	0.000335232
k__Bacteria; p__Firmicutes; c__Clostridia; o__Clostridiales; f__Lachnospiraceae; g__Coprococcus; s__	0.105849	125.219	0.312267	2.16717e-05	2.77814e-06
k__Bacteria; p__Firmicutes; c__Clostridia; o__Clostridiales; f__Lachnospiraceae; g__; s__	0.106201	125.636	0.312527	3.99691e-05	1.44158e-05
k__Bacteria; p__Bacteroidetes; c__Bacteroidia; o__Bacteroidales; f__Bacteroidaceae; g__Bacteroides; s__	0.106217	125.654	0.311797	3.79083e-05	1.64753e-05
k__Bacteria; p__Firmicutes; c__Clostridia; o__Clostridiales; f__Lachnospiraceae; g__Ruminococcus; s__	0.106284	125.734	0.311223	3.24217e-05	8.64877e-06
k__Bacteria; p__Firmicutes; c__Clostridia; o__Clostridiales; f__Ruminococcaceae; g__; s__	0.106629	126.143	0.311463	5.21562e-05	1.94661e-05
k__Bacteria; p__Firmicutes; c__Clostridia; o__Clostridiales; f__Lachnospiraceae; g__Eubacterium; s__	0.10744	127.102	0.313058	0.00145699	0.000631732
k__Bacteria; p__Bacteroidetes; c__Bacteroidia; o__Bacteroidales; f__Bacteroidaceae; g__Bacteroides; s__	0.107693	127.401	0.313024	1.40614e-05	3.70917e-05
k__Bacteria; p__Firmicutes; c__Clostridia; o__Clostridiales; f__Ruminococcaceae; g__Faecalibacterium; s__	0.107928	127.679	0.312939	2.15679e-05	6.62256e-06
k__Bacteria; p__Firmicutes; c__Clostridia; o__Clostridiales; f__Ruminococcaceae; g__; s__	0.108833	128.749	0.314791	4.42932e-05	1.34345e-05
k__Bacteria; p__Bacteroidetes; c__Bacteroidia; o__Bacteroidales; f__Bacteroidaceae; g__Bacteroides; s__Bacteroidesfragilis	0.109266	129.262	0.315274	6.6816e-05	2.12183e-05
k__Bacteria; p__Bacteroidetes; c__Bacteroidia; o__Bacteroidales; f__; g__; s__	0.109573	129.624	0.315388	9.43732e-06	2.71005e-05
k__Bacteria; p__Firmicutes; c__Clostridia; o__Clostridiales; f__Lachnospiraceae; g__Blautia; s__	0.10976	129.846	0.31516	1.25453e-05	2.91457e-05
k__Bacteria; p__Firmicutes; c__Clostridia; o__Clostridiales; f__Lachnospiraceae; g__Coprococcus; s__	0.110272	130.452	0.315864	0.00030683	0.000133246
k__Bacteria; p__Firmicutes; c__Clostridia; o__Clostridiales; f__Lachnospiraceae; g__Clostridium; s__	0.110387	130.588	0.315429	0.000777199	0.00133965
k__Bacteria; p__Firmicutes; c__Clostridia; o__Clostridiales; f__Ruminococcaceae; g__Faecalibacterium; s__	0.110407	130.612	0.314728	0.000134461	6.47877e-05
k__Bacteria; p__Bacteroidetes; c__Bacteroidia; o__Bacteroidales; f__Bacteroidaceae; g__Bacteroides; s__	0.110423	130.63	0.314014	2.53476e-05	8.65895e-06
k__Bacteria; p__Firmicutes; c__Clostridia; o__Clostridiales; f__; g__; s__	0.110543	130.772	0.313603	0.0013386	0.000570917
k__Bacteria; p__Firmicutes; c__Clostridia; o__Clostridiales; f__Ruminococcaceae; g__Faecalibacterium; s__	0.111098	131.429	0.314423	1.51582e-05	2.04825e-06
k__Bacteria; p__Bacteroidetes; c__Bacteroidia; o__Bacteroidales; f__Porphyromonadaceae; g__Parabacteroides; s__Parabacteroidesjohnsonii	0.11131	131.68	0.314272	0.000832556	0.00015331
k__Bacteria; p__Tenericutes; c__Erysipelotrichi; o__Erysipelotrichales; f__Erysipelotrichaceae; g__Clostridium; s__	0.111923	132.404	0.315248	6.91122e-05	2.54177e-05
k__Bacteria; p__Firmicutes; c__Clostridia; o__Clostridiales; f__Lachnospiraceae; g__Dorea; s__Doreaformicigenerans	0.112231	132.769	0.315365	4.26103e-05	1.1924e-05
k__Bacteria; p__Bacteroidetes; c__Bacteroidia; o__Bacteroidales; f__Bacteroidaceae; g__Bacteroides; s__	0.112843	133.493	0.316334	3.42039e-05	1.26664e-05
k__Bacteria; p__Bacteroidetes; c__Bacteroidia; o__Bacteroidales; f__Prevotellaceae; g__Prevotella; s__	0.112984	133.66	0.31598	6.65249e-05	0.000210233
k__Bacteria; p__Bacteroidetes; c__Bacteroidia; o__Bacteroidales; f__Bacteroidaceae; g__Bacteroides; s__	0.113685	134.489	0.317191	3.50851e-05	1.47719e-05
k__Bacteria; p__Firmicutes; c__Clostridia; o__Clostridiales; f__Lachnospiraceae; g__; s__	0.115348	136.457	0.321076	2.87087e-05	5.65147e-06
k__Bacteria; p__Firmicutes; c__Clostridia; o__Clostridiales; f__Lachnospiraceae; g__Ruminococcus; s__	0.116405	137.707	0.323255	0.00028367	0.000124733
k__Bacteria; p__Firmicutes; c__Clostridia; o__Clostridiales; f__Lachnospiraceae; g__Ruminococcus; s__Ruminococcustorques	0.116906	138.3	0.323887	5.05879e-05	2.18229e-05
k__Bacteria; p__Firmicutes; c__Clostridia; o__Clostridiales; f__Ruminococcaceae; g__; s__	0.117059	138.48	0.323552	0.000531108	0.000180921
k__Bacteria; p__Firmicutes; c__Clostridia; o__Clostridiales; f__Ruminococcaceae; g__Clostridium; s__	0.117302	138.768	0.323469	6.41986e-05	3.50678e-05
k__Bacteria; p__Firmicutes; c__Clostridia; o__Clostridiales; f__Lachnospiraceae; g__; s__	0.117325	138.795	0.32278	3.02093e-05	8.90641e-06
k__Bacteria; p__Bacteroidetes; c__Bacteroidia; o__Bacteroidales; f__Bacteroidaceae; g__Bacteroides; s__	0.117563	139.077	0.322686	1.10843e-05	2.45983e-05
k__Bacteria; p__Firmicutes; c__Clostridia; o__Clostridiales; f__Lachnospiraceae; g__Ruminococcus; s__Ruminococcusgnavus	0.117674	139.208	0.322241	0.000132568	7.23655e-05
k__Bacteria; p__Bacteroidetes; c__Bacteroidia; o__Bacteroidales; f__Bacteroidaceae; g__Bacteroides; s__Bacteroidesfragilis	0.119366	141.21	0.326121	1.1894e-05	3.07556e-05
k__Bacteria; p__Firmicutes; c__Clostridia; o__Clostridiales; f__Peptostreptococcaceae; g__Peptostreptococcus; s__	0.119834	141.764	0.326644	6.41359e-05	0.000247751
k__Bacteria; p__Firmicutes; c__Clostridia; o__Clostridiales; f__Lachnospiraceae; g__Clostridium; s__Clostridiumbolteae	0.121646	143.907	0.330821	1.66909e-05	4.79228e-05
k__Bacteria; p__Firmicutes; c__Clostridia; o__Clostridiales; f__Ruminococcaceae; g__Faecalibacterium; s__	0.121752	144.033	0.33035	0.00715424	0.00324859
k__Bacteria; p__Firmicutes; c__Clostridia; o__Clostridiales; f__Lachnospiraceae; g__; s__	0.121972	144.293	0.330189	7.21857e-06	2.05158e-05
k__Bacteria; p__Firmicutes; c__Clostridia; o__Clostridiales; f__Ruminococcaceae; g__; s__	0.122464	144.875	0.330764	4.3604e-05	9.8459e-06
k__Bacteria; p__Firmicutes; c__Clostridia; o__Clostridiales; f__Lachnospiraceae; g__Clostridium; s__	0.122685	145.137	0.330608	2.92526e-05	1.17889e-05
k__Bacteria; p__Actinobacteria; c__Actinobacteria; o__Coriobacteriales; f__Coriobacteriaceae; g__Collinsella; s__Collinsellaaerofaciens	0.123121	145.652	0.331027	0.000374889	0.000221536
k__Bacteria; p__Bacteroidetes; c__Bacteroidia; o__Bacteroidales; f__Bacteroidaceae; g__Bacteroides; s__	0.124184	146.91	0.33313	0.00791928	0.0138532
k__Bacteria; p__Firmicutes; c__Clostridia; o__Clostridiales; f__Lachnospiraceae; g__Eubacterium; s__	0.125595	148.578	0.33615	0.000157486	8.11175e-05
k__Bacteria; p__Firmicutes; c__Clostridia; o__Clostridiales; f__Lachnospiraceae; g__; s__	0.125871	148.905	0.336129	7.39396e-05	0.000136428
k__Bacteria; p__Firmicutes; c__Clostridia; o__Clostridiales; f__Lachnospiraceae; g__Clostridium; s__	0.12606	149.129	0.335876	0.00025889	8.80184e-06
k__Bacteria; p__Firmicutes; c__Clostridia; o__Clostridiales; f__Ruminococcaceae; g__Clostridium; s__	0.126756	149.952	0.33697	2.72596e-05	7.07294e-06
k__Bacteria; p__Proteobacteria; c__Gammaproteobacteria; o__Pasteurellales; f__Pasteurellaceae; g__; s__	0.127214	150.494	0.33743	1.97068e-05	5.67956e-06
k__Bacteria; p__Proteobacteria; c__Betaproteobacteria; o__Burkholderiales; f__Alcaligenaceae; g__Sutterella; s__	0.128094	151.535	0.339004	0.00181719	0.000320118
k__Bacteria; p__Firmicutes; c__Clostridia; o__Clostridiales; f__Ruminococcaceae; g__Faecalibacterium; s__	0.128095	151.536	0.338251	0.00020651	0.000341494
k__Bacteria; p__Firmicutes; c__Clostridia; o__Clostridiales; f__Lachnospiraceae; g__Ruminococcus; s__	0.128324	151.807	0.338101	0.000169012	3.25841e-05
k__Bacteria; p__Firmicutes; c__Clostridia; o__Clostridiales; f__Lachnospiraceae; g__Clostridium; s__	0.129461	153.152	0.340338	0.00292012	0.00143271
k__Bacteria; p__Firmicutes; c__Clostridia; o__Clostridiales; f__Lachnospiraceae; g__; s__	0.129774	153.523	0.340405	4.10951e-05	6.41311e-06
k__Bacteria; p__Firmicutes; c__Clostridia; o__Clostridiales; f__Lachnospiraceae; g__; s__	0.131645	155.736	0.344548	4.49793e-05	1.71046e-05
k__Bacteria; p__Firmicutes; c__Clostridia; o__Clostridiales; f__Ruminococcaceae; g__Faecalibacterium; s__Faecalibacteriumprausnitzii	0.132661	156.938	0.346442	4.26567e-05	2.33288e-05
k__Bacteria; p__Tenericutes; c__Erysipelotrichi; o__Erysipelotrichales; f__Erysipelotrichaceae; g__; s__Eubacteriumbiforme	0.132791	157.092	0.346017	1.14935e-05	3.92417e-05
k__Bacteria; p__Firmicutes; c__Clostridia; o__Clostridiales; f__Lachnospiraceae; g__Ruminococcus; s__Ruminococcusgnavus	0.133061	157.411	0.345959	3.84869e-05	1.60722e-05
k__Bacteria; p__Bacteroidetes; c__Bacteroidia; o__Bacteroidales; f__Bacteroidaceae; g__Bacteroides; s__	0.133737	158.211	0.346954	9.69266e-05	5.53278e-05
k__Bacteria; p__Firmicutes; c__Clostridia; o__Clostridiales; f__Lachnospiraceae; g__Ruminococcus; s__Ruminococcustorques	0.134676	159.322	0.348626	6.82894e-05	2.51395e-05
k__Bacteria; p__Firmicutes; c__Clostridia; o__Clostridiales; f__Ruminococcaceae; g__; s__	0.134875	159.557	0.348379	0.000209147	0.000358805
k__Bacteria; p__Firmicutes; c__Clostridia; o__Clostridiales; f__Lachnospiraceae; g__Blautia; s__	0.135064	159.781	0.348107	3.57841e-05	1.35067e-05
k__Bacteria; p__Bacteroidetes; c__Bacteroidia; o__Bacteroidales; f__Bacteroidaceae; g__Bacteroides; s__Bacteroidesfragilis	0.13772	162.923	0.354181	2.5136e-05	8.21582e-06
k__Bacteria; p__Firmicutes; c__Clostridia; o__Clostridiales; f__Lachnospiraceae; g__Clostridium; s__	0.138253	163.553	0.354778	0.00096162	0.000493677
k__Bacteria; p__Firmicutes; c__Clostridia; o__Clostridiales; f__Lachnospiraceae; g__Ruminococcus; s__Ruminococcustorques	0.138831	164.237	0.355492	0.000154933	7.88245e-05
k__Bacteria; p__Proteobacteria; c__Gammaproteobacteria; o__Enterobacteriales; f__Enterobacteriaceae; g__; s__	0.141266	167.118	0.360946	4.83803e-05	1.47185e-05
k__Bacteria; p__Proteobacteria; c__Deltaproteobacteria; o__Desulfovibrionales; f__Desulfovibrionaceae; g__Bilophila; s__Bilophilawadsworthia	0.141602	167.516	0.361025	2.54453e-05	3.04794e-06
k__Bacteria; p__Firmicutes; c__Clostridia; o__Clostridiales; f__Ruminococcaceae; g__; s__	0.14356	169.832	0.365229	2.82488e-05	4.86666e-06
k__Bacteria; p__Proteobacteria; c__Gammaproteobacteria; o__Pasteurellales; f__Pasteurellaceae; g__; s__	0.143585	169.86	0.364507	4.44437e-05	1.05405e-05
k__Bacteria; p__Firmicutes; c__Clostridia; o__Clostridiales; f__ClostridialesFamilyXIII.IncertaeSedis; g__; s__	0.143713	170.012	0.364052	3.32963e-05	8.42827e-05
k__Bacteria; p__Proteobacteria; c__Deltaproteobacteria; o__Desulfovibrionales; f__Desulfovibrionaceae; g__Desulfovibrio; s__Desulfovibriodesulfuricans	0.144282	170.686	0.364714	0.000191987	2.53746e-06
k__Bacteria; p__Firmicutes; c__Clostridia; o__Clostridiales; f__Ruminococcaceae; g__; s__	0.144311	170.72	0.364008	0.000190172	9.86841e-05
k__Bacteria; p__Tenericutes; c__Erysipelotrichi; o__Erysipelotrichales; f__Erysipelotrichaceae; g__; s__Clostridiuminnocuum	0.144566	171.022	0.363876	1.50059e-05	4.28746e-05
k__Bacteria; p__Firmicutes; c__Clostridia; o__Clostridiales; f__Lachnospiraceae; g__Clostridium; s__	0.144885	171.399	0.363904	0.000572797	0.00104351
k__Bacteria; p__Firmicutes; c__Clostridia; o__Clostridiales; f__Ruminococcaceae; g__; s__	0.145796	172.476	0.365415	0.000222533	0.000115935
k__Bacteria; p__Firmicutes; c__Clostridia; o__Clostridiales; f__Lachnospiraceae; g__; s__	0.14634	173.12	0.366004	1.22265e-05	3.33335e-05
k__Bacteria; p__Firmicutes; c__Clostridia; o__Clostridiales; f__ClostridialesFamilyXI.IncertaeSedis; g__; s__	0.146839	173.71	0.366477	1.66023e-05	5.84961e-05
k__Bacteria; p__Firmicutes; c__Clostridia; o__Clostridiales; f__Lachnospiraceae; g__Lachnobacterium; s__	0.147053	173.964	0.366239	0.000796067	0.000470883
k__Bacteria; p__Firmicutes; c__Bacilli; o__Lactobacillales; f__Streptococcaceae; g__Streptococcus; s__	0.147081	173.996	0.365538	0.00102341	0.00307103
k__Bacteria; p__Proteobacteria; c__Gammaproteobacteria; o__Enterobacteriales; f__Enterobacteriaceae; g__Rahnella; s__	0.147139	174.065	0.364917	1.16471e-05	2.71216e-05
k__Bacteria; p__Cyanobacteria; c__4C0d-2; o__YS2; f__; g__; s__	0.14865	175.853	0.367892	0.000142476	0
k__Bacteria; p__Bacteroidetes; c__Bacteroidia; o__Bacteroidales; f__Bacteroidaceae; g__Bacteroides; s__Bacteroidesfragilis	0.148916	176.167	0.367781	0.0911207	0.0579752
k__Bacteria; p__Firmicutes; c__Clostridia; o__Clostridiales; f__Lachnospiraceae; g__; s__	0.149035	176.308	0.367308	2.22776e-05	6.84639e-06
k__Bacteria; p__Firmicutes; c__Clostridia; o__Clostridiales; f__Lachnospiraceae; g__; s__	0.1495	176.859	0.36769	0.000102164	0.000239965
k__Bacteria; p__Firmicutes; c__Clostridia; o__Clostridiales; f__; g__; s__	0.14989	177.32	0.367884	8.77835e-05	0
k__Bacteria; p__Proteobacteria; c__Gammaproteobacteria; o__Enterobacteriales; f__Enterobacteriaceae; g__Escherichia; s__	0.149967	177.411	0.367311	7.39297e-05	0.000158747
k__Bacteria; p__Firmicutes; c__Clostridia; o__Clostridiales; f__Ruminococcaceae; g__; s__	0.150282	177.784	0.367322	0.0057982	0.00375098
k__Bacteria; p__Firmicutes; c__Clostridia; o__Clostridiales; f__Lachnospiraceae; g__; s__	0.150609	178.171	0.367363	9.34118e-06	2.31989e-05
k__Bacteria; p__Firmicutes; c__Clostridia; o__Clostridiales; f__Lachnospiraceae; g__Clostridium; s__	0.151496	179.22	0.368765	5.69347e-05	1.7389e-05
k__Bacteria; p__Firmicutes; c__Clostridia; o__Clostridiales; f__Ruminococcaceae; g__; s__	0.151509	179.235	0.368038	0.000114665	9.8459e-06
k__Bacteria; p__Firmicutes; c__Clostridia; o__Clostridiales; f__Ruminococcaceae; g__; s__	0.151749	179.519	0.367867	2.82088e-05	2.83435e-06
k__Bacteria; p__Firmicutes; c__Clostridia; o__Clostridiales; f__Clostridiaceae; g__Clostridium; s__	0.152233	180.092	0.368287	0.000134001	4.72775e-06
k__Bacteria; p__Firmicutes; c__Clostridia; o__Clostridiales; f__Lachnospiraceae; g__Blautia; s__	0.152362	180.245	0.367846	0.000338278	0.000525974
k__Bacteria; p__Firmicutes; c__Clostridia; o__Clostridiales; f__Lachnospiraceae; g__; s__	0.152614	180.543	0.367704	9.99954e-05	1.26948e-05
k__Bacteria; p__Proteobacteria; c__Gammaproteobacteria; o__Enterobacteriales; f__Enterobacteriaceae; g__; s__	0.152683	180.623	0.367121	9.14083e-05	3.55593e-06
k__Bacteria; p__Firmicutes; c__Clostridia; o__Clostridiales; f__Ruminococcaceae; g__; s__	0.152698	180.642	0.366414	3.97204e-05	1.53274e-05
k__Bacteria; p__Firmicutes; c__Clostridia; o__Clostridiales; f__Lachnospiraceae; g__; s__	0.152772	180.73	0.36585	0.000117986	6.17407e-05
k__Bacteria; p__Firmicutes; c__Clostridia; o__Clostridiales; f__Lachnospiraceae; g__Coprococcus; s__	0.154678	182.984	0.369665	0.000127855	6.61693e-05
k__Bacteria; p__Bacteroidetes; c__Bacteroidia; o__Bacteroidales; f__Bacteroidaceae; g__Bacteroides; s__	0.155819	184.333	0.37164	1.51662e-05	2.87198e-05
k__Bacteria; p__Firmicutes; c__Clostridia; o__Clostridiales; f__Lachnospiraceae; g__; s__	0.155898	184.427	0.37108	1.75808e-05	5.3368e-06
k__Bacteria; p__Firmicutes; c__Clostridia; o__Clostridiales; f__Lachnospiraceae; g__; s__	0.157413	186.219	0.373934	1.86834e-05	3.71622e-05
k__Bacteria; p__Proteobacteria; c__Betaproteobacteria; o__Burkholderiales; f__Oxalobacteraceae; g__; s__	0.157623	186.469	0.373685	2.45513e-05	5.51278e-05
k__Bacteria; p__Firmicutes; c__Clostridia; o__Clostridiales; f__Lachnospiraceae; g__Clostridium; s__	0.158896	187.974	0.375949	2.52926e-05	5.74657e-05
k__Bacteria; p__Firmicutes; c__Clostridia; o__Clostridiales; f__Lachnospiraceae; g__; s__	0.15948	188.664	0.376576	2.61438e-05	9.72925e-06
k__Bacteria; p__Firmicutes; c__Clostridia; o__Clostridiales; f__Lachnospiraceae; g__Blautia; s__	0.160441	189.802	0.378092	4.09801e-05	7.87888e-05
k__Bacteria; p__Firmicutes; c__Clostridia; o__Clostridiales; f__Lachnospiraceae; g__Clostridium; s__	0.161536	191.097	0.379914	0.000142154	5.37026e-05
k__Bacteria; p__Firmicutes; c__Clostridia; o__Clostridiales; f__; g__; s__	0.16166	191.244	0.379452	7.75864e-05	0.000261913
k__Bacteria; p__Bacteroidetes; c__Bacteroidia; o__Bacteroidales; f__Bacteroidaceae; g__Bacteroides; s__Bacteroidesfragilis	0.161936	191.57	0.379347	0.000272822	0.000171638
k__Bacteria; p__Proteobacteria; c__Gammaproteobacteria; o__Enterobacteriales; f__Enterobacteriaceae; g__Pantoea; s__	0.163494	193.413	0.382239	3.23142e-05	4.97557e-06
k__Bacteria; p__Firmicutes; c__Clostridia; o__Clostridiales; f__Lachnospiraceae; g__Lachnospira; s__	0.164121	194.155	0.38295	0.00148589	0.000528018
k__Bacteria; p__Actinobacteria; c__Actinobacteria; o__Bifidobacteriales; f__; g__; s__	0.164688	194.826	0.383516	1.33174e-05	2.96909e-05
k__Bacteria; p__Bacteroidetes; c__Bacteroidia; o__Bacteroidales; f__Bacteroidaceae; g__Bacteroides; s__	0.165887	196.245	0.38555	2.4919e-05	6.95154e-05
k__Bacteria; p__Bacteroidetes; c__Bacteroidia; o__Bacteroidales; f__Bacteroidaceae; g__Bacteroides; s__	0.166273	196.7	0.385687	5.07677e-05	2.66485e-05
k__Bacteria; p__Proteobacteria; c__Alphaproteobacteria; o__Rhodospirillales; f__Acetobacteraceae; g__; s__	0.167115	197.697	0.386882	3.99512e-05	0.000105833
k__Bacteria; p__Firmicutes; c__Clostridia; o__Clostridiales; f__Lachnospiraceae; g__; s__	0.16754	198.2	0.38711	0.000518555	6.08496e-05
k__Bacteria; p__Bacteroidetes; c__Bacteroidia; o__Bacteroidales; f__Bacteroidaceae; g__Bacteroides; s__	0.168269	199.062	0.388035	0.000126244	5.45397e-05
k__Bacteria; p__Bacteroidetes; c__Bacteroidia; o__Bacteroidales; f__Bacteroidaceae; g__Bacteroides; s__Bacteroidesfragilis	0.169547	200.574	0.390223	1.6695e-05	4.57431e-06
k__Bacteria; p__Bacteroidetes; c__Bacteroidia; o__Bacteroidales; f__Bacteroidaceae; g__Bacteroides; s__	0.169866	200.952	0.390197	5.8353e-05	3.33007e-05
k__Bacteria; p__Proteobacteria; c__Gammaproteobacteria; o__Enterobacteriales; f__Enterobacteriaceae; g__; s__	0.170403	201.586	0.390671	6.49509e-05	0.000124043
k__Bacteria; p__Firmicutes; c__Clostridia; o__Clostridiales; f__Ruminococcaceae; g__Oscillospira; s__	0.17111	202.423	0.391533	8.1056e-05	2.01393e-05
k__Bacteria; p__Bacteroidetes; c__Bacteroidia; o__Bacteroidales; f__Bacteroidaceae; g__Bacteroides; s__	0.172821	204.447	0.394686	2.49424e-05	4.3527e-05
k__Bacteria; p__Firmicutes; c__Clostridia; o__Clostridiales; f__; g__; s__	0.173605	205.375	0.395713	0.00106848	0.000314846
k__Bacteria; p__Firmicutes; c__Clostridia; o__Clostridiales; f__Lachnospiraceae; g__; s__	0.174819	206.811	0.397714	3.62827e-05	1.22279e-05
k__Bacteria; p__Firmicutes; c__Clostridia; o__Clostridiales; f__Ruminococcaceae; g__; s__	0.174978	206.999	0.39731	3.55763e-05	0.000103426
k__Bacteria; p__Bacteroidetes; c__Bacteroidia; o__Bacteroidales; f__Bacteroidaceae; g__Bacteroides; s__	0.175792	207.962	0.398395	2.02581e-05	3.73303e-05
k__Bacteria; p__Firmicutes; c__Clostridia; o__Clostridiales; f__Ruminococcaceae; g__Faecalibacterium; s__	0.175851	208.032	0.397766	8.02994e-05	0.000132794
k__Bacteria; p__Firmicutes; c__Clostridia; o__Clostridiales; f__Lachnospiraceae; g__Eubacterium; s__	0.176296	208.559	0.398013	2.08206e-05	5.27462e-06
k__Bacteria; p__Firmicutes; c__Clostridia; o__Clostridiales; f__Lachnospiraceae; g__Blautia; s__	0.176372	208.648	0.397425	3.09021e-05	7.17513e-06
k__Bacteria; p__Firmicutes; c__Clostridia; o__Clostridiales; f__Lachnospiraceae; g__Clostridium; s__	0.178324	210.957	0.401058	2.70187e-05	9.66809e-06
k__Bacteria; p__Firmicutes; c__Clostridia; o__Clostridiales; f__Ruminococcaceae; g__; s__	0.178885	211.62	0.401557	2.9542e-05	1.0609e-05
k__Bacteria; p__Firmicutes; c__Clostridia; o__Clostridiales; f__Lachnospiraceae; g__; s__	0.179008	211.766	0.401072	0.000269545	0.000129172
k__Bacteria; p__Firmicutes; c__Clostridia; o__Clostridiales; f__Lachnospiraceae; g__; s__	0.179547	212.404	0.40152	7.61632e-05	2.09198e-05
k__Bacteria; p__Firmicutes; c__Clostridia; o__Clostridiales; f__Catabacteriaceae; g__; s__	0.180653	213.712	0.403231	1.51362e-05	3.56893e-05
k__Bacteria; p__Firmicutes; c__Clostridia; o__Clostridiales; f__Lachnospiraceae; g__Anaerostipes; s__	0.180664	213.726	0.402497	4.62562e-05	1.93849e-05
k__Bacteria; p__Firmicutes; c__Clostridia; o__Clostridiales; f__Lachnospiraceae; g__; s__	0.180782	213.865	0.402001	5.11549e-05	7.23326e-06
k__Bacteria; p__Firmicutes; c__Clostridia; o__Clostridiales; f__Clostridiaceae; g__Clostridium; s__	0.181481	214.693	0.4028	6.95922e-05	1.18234e-05
k__Bacteria; p__Fusobacteria; c__Fusobacteria; o__Fusobacteriales; f__Fusobacteriaceae; g__Fusobacterium; s__	0.182261	215.614	0.403772	0.00440977	0.000132386
k__Bacteria; p__Firmicutes; c__Clostridia; o__Clostridiales; f__Lachnospiraceae; g__Ruminococcus; s__Ruminococcusgnavus	0.182805	216.258	0.404221	2.28503e-05	7.82449e-06
k__Bacteria; p__Tenericutes; c__Erysipelotrichi; o__Erysipelotrichales; f__Erysipelotrichaceae; g__; s__Clostridiuminnocuum	0.182903	216.375	0.403684	1.25058e-05	2.83473e-05
k__Bacteria; p__Firmicutes; c__Clostridia; o__Clostridiales; f__Lachnospiraceae; g__; s__	0.183096	216.602	0.403356	2.86388e-05	5.87108e-06
k__Bacteria; p__Firmicutes; c__Clostridia; o__Clostridiales; f__Ruminococcaceae; g__Faecalibacterium; s__	0.183874	217.523	0.404318	1.51979e-05	3.10044e-05
k__Bacteria; p__Firmicutes; c__Clostridia; o__Clostridiales; f__Lachnospiraceae; g__Roseburia; s__Eubacteriumrectale	0.185486	219.43	0.407106	7.15658e-05	3.41612e-05
k__Bacteria; p__Firmicutes; c__Clostridia; o__Clostridiales; f__Lachnospiraceae; g__Clostridium; s__	0.185584	219.545	0.406565	0.00136729	0.000307538
k__Bacteria; p__Firmicutes; c__Clostridia; o__Clostridiales; f__Lachnospiraceae; g__Roseburia; s__Roseburiafaecis	0.186103	220.16	0.40695	0.00010355	6.76928e-06
k__Bacteria; p__Firmicutes; c__Clostridia; o__Clostridiales; f__Lachnospiraceae; g__; s__	0.18638	220.487	0.406803	6.26984e-05	0.000108188
k__Bacteria; p__Firmicutes; c__Clostridia; o__Clostridiales; f__Lachnospiraceae; g__; s__	0.188526	223.026	0.41073	3.25082e-05	7.13733e-06
k__Bacteria; p__Proteobacteria; c__Gammaproteobacteria; o__Enterobacteriales; f__Enterobacteriaceae; g__; s__	0.190654	225.544	0.414602	0.000134565	5.85907e-05
k__Bacteria; p__Bacteroidetes; c__Bacteroidia; o__Bacteroidales; f__Rikenellaceae; g__Alistipes; s__	0.19173	226.816	0.416177	1.02979e-05	2.68285e-05
k__Bacteria; p__Firmicutes; c__Clostridia; o__Clostridiales; f__Lachnospiraceae; g__Ruminococcus; s__Ruminococcustorques	0.192818	228.104	0.417772	2.28092e-05	9.13658e-06
k__Bacteria; p__Firmicutes; c__Clostridia; o__Clostridiales; f__; g__; s__	0.19305	228.378	0.417511	0.000394824	0.000269001
k__Bacteria; p__Firmicutes; c__Clostridia; o__Clostridiales; f__Lachnospiraceae; g__; s__	0.194995	230.68	0.420948	0.000124703	6.97448e-05
k__Bacteria; p__Bacteroidetes; c__Bacteroidia; o__Bacteroidales; f__Bacteroidaceae; g__Bacteroides; s__	0.195816	231.65	0.42195	7.06935e-06	1.67263e-05
k__Bacteria; p__Firmicutes; c__Clostridia; o__Clostridiales; f__Ruminococcaceae; g__Clostridium; s__Clostridiumorbiscindens	0.196025	231.898	0.421633	0.00012837	7.16669e-05
k__Bacteria; p__Bacteroidetes; c__Bacteroidia; o__Bacteroidales; f__Bacteroidaceae; g__Bacteroides; s__Bacteroidesfragilis	0.197511	233.655	0.424056	2.00097e-05	5.79656e-06
k__Bacteria; p__Firmicutes; c__Clostridia; o__Clostridiales; f__Lachnospiraceae; g__; s__	0.197966	234.194	0.424265	2.15494e-05	5.87108e-06
k__Bacteria; p__Firmicutes; c__Clostridia; o__Clostridiales; f__Lachnospiraceae; g__Coprococcus; s__	0.198637	234.988	0.424933	0.000252501	0.000107115
k__Bacteria; p__Bacteroidetes; c__Bacteroidia; o__Bacteroidales; f__Rikenellaceae; g__Alistipes; s__	0.199031	235.453	0.425006	0.000662171	0
k__Bacteria; p__Firmicutes; c__Clostridia; o__Clostridiales; f__Lachnospiraceae; g__; s__	0.199881	236.459	0.426052	0.00155347	0
k__Bacteria; p__Proteobacteria; c__Gammaproteobacteria; o__Pasteurellales; f__Pasteurellaceae; g__; s__	0.200333	236.994	0.426248	2.57851e-05	8.5315e-06
k__Bacteria; p__Firmicutes; c__Clostridia; o__Clostridiales; f__Lachnospiraceae; g__Blautia; s__	0.20153	238.41	0.428026	0.00111699	0.00163507
k__Bacteria; p__Bacteroidetes; c__Bacteroidia; o__Bacteroidales; f__Bacteroidaceae; g__Bacteroides; s__	0.201684	238.593	0.427585	5.54772e-05	1.59445e-05
k__Bacteria; p__Firmicutes; c__Clostridia; o__Clostridiales; f__Veillonellaceae; g__Acidaminococcus; s__	0.202152	239.146	0.42781	0.00108299	0.00215376
k__Bacteria; p__Bacteroidetes; c__Bacteroidia; o__Bacteroidales; f__Bacteroidaceae; g__Bacteroides; s__	0.202652	239.738	0.428103	7.21495e-06	1.62088e-05
k__Bacteria; p__Firmicutes; c__Clostridia; o__Clostridiales; f__Ruminococcaceae; g__; s__	0.203247	240.442	0.428595	2.8586e-05	5.3852e-05
k__Bacteria; p__Bacteroidetes; c__Bacteroidia; o__Bacteroidales; f__; g__; s__	0.205713	243.359	0.433023	0.0124761	0.0180854
k__Bacteria; p__Bacteroidetes; c__Bacteroidia; o__Bacteroidales; f__Porphyromonadaceae; g__Parabacteroides; s__Parabacteroidesdistasonis	0.205767	243.423	0.432367	0.0119626	0.0176577
k__Bacteria; p__Firmicutes; c__Clostridia; o__Clostridiales; f__Ruminococcaceae; g__; s__	0.206112	243.83	0.432323	0.00271021	0.00179934
k__Bacteria; p__Firmicutes; c__Clostridia; o__Clostridiales; f__Lachnospiraceae; g__Ruminococcus; s__Ruminococcusgnavus	0.206564	244.365	0.432505	5.53042e-05	2.59786e-05
k__Bacteria; p__Firmicutes; c__Clostridia; o__Clostridiales; f__Lachnospiraceae; g__Ruminococcus; s__Ruminococcustorques	0.207823	245.854	0.434371	1.71183e-05	6.60663e-06
k__Bacteria; p__Firmicutes; c__Clostridia; o__Clostridiales; f__Lachnospiraceae; g__Eubacterium; s__	0.209186	247.467	0.436449	2.31821e-05	8.74e-06
k__Bacteria; p__Firmicutes; c__Clostridia; o__Clostridiales; f__Lachnospiraceae; g__; s__	0.20997	248.394	0.437314	3.84776e-05	7.6777e-05
k__Bacteria; p__Firmicutes; c__Clostridia; o__Clostridiales; f__Lachnospiraceae; g__Clostridium; s__	0.210372	248.871	0.437382	2.66387e-05	1.26306e-05
k__Bacteria; p__Firmicutes; c__Clostridia; o__Clostridiales; f__Ruminococcaceae; g__; s__	0.210402	248.906	0.436677	0.000155907	7.41206e-05
k__Bacteria; p__Firmicutes; c__Clostridia; o__Clostridiales; f__Lachnospiraceae; g__Clostridium; s__	0.213279	252.309	0.441872	0.00103883	0.00061625
k__Bacteria; p__Bacteroidetes; c__Bacteroidia; o__Bacteroidales; f__Bacteroidaceae; g__Bacteroides; s__	0.2139	253.044	0.442385	2.7947e-05	1.17184e-05
k__Bacteria; p__Firmicutes; c__Clostridia; o__Clostridiales; f__Lachnospiraceae; g__; s__	0.214484	253.735	0.442819	2.1038e-05	8.94004e-06
k__Bacteria; p__Firmicutes; c__Clostridia; o__Clostridiales; f__Lachnospiraceae; g__Ruminococcus; s__	0.214844	254.16	0.442788	0.00920348	0.00225257
k__Bacteria; p__Firmicutes; c__Clostridia; o__Clostridiales; f__Lachnospiraceae; g__; s__	0.215959	255.479	0.444312	0.000302666	6.5046e-05
k__Bacteria; p__Firmicutes; c__Clostridia; o__Clostridiales; f__Ruminococcaceae; g__Ruminococcus; s__	0.216942	256.642	0.445559	2.1285e-05	4.59999e-05
k__Bacteria; p__Firmicutes; c__Clostridia; o__Clostridiales; f__Ruminococcaceae; g__; s__	0.217714	257.555	0.446369	0.000175495	2.41196e-05
k__Bacteria; p__Firmicutes; c__Clostridia; o__Clostridiales; f__Ruminococcaceae; g__; s__	0.21793	257.812	0.446041	0.000796297	0.000452651
k__Bacteria; p__Firmicutes; c__Clostridia; o__Clostridiales; f__Lachnospiraceae; g__; s__	0.218101	258.014	0.445619	3.34475e-05	1.40599e-05
k__Bacteria; p__Bacteroidetes; c__Bacteroidia; o__Bacteroidales; f__Prevotellaceae; g__Prevotella; s__	0.218371	258.333	0.445402	5.90207e-05	0.000149829
k__Bacteria; p__Firmicutes; c__Clostridia; o__Clostridiales; f__Lachnospiraceae; g__Clostridium; s__	0.218476	258.457	0.444849	4.87609e-05	2.17501e-05
k__Bacteria; p__Bacteroidetes; c__Bacteroidia; o__Bacteroidales; f__Porphyromonadaceae; g__; s__	0.219099	259.194	0.445351	0.000293343	0.000570748
k__Bacteria; p__Firmicutes; c__Clostridia; o__Clostridiales; f__Lachnospiraceae; g__; s__	0.22018	260.473	0.44678	4.27892e-05	1.75992e-05
k__Bacteria; p__Bacteroidetes; c__Bacteroidia; o__Bacteroidales; f__Bacteroidaceae; g__Bacteroides; s__Bacteroidesuniformis	0.220471	260.818	0.446606	2.46753e-05	1.14049e-05
k__Bacteria; p__Firmicutes; c__Clostridia; o__Clostridiales; f__Lachnospiraceae; g__Blautia; s__	0.220976	261.415	0.446864	0.00279914	0.00174995
k__Bacteria; p__Firmicutes; c__Clostridia; o__Clostridiales; f__Lachnospiraceae; g__Ruminococcus; s__	0.221932	262.546	0.448031	0.000136697	7.51421e-05
k__Bacteria; p__Firmicutes; c__Clostridia; o__Clostridiales; f__Ruminococcaceae; g__; s__	0.223257	264.113	0.449938	3.03695e-05	8.18913e-06
k__Bacteria; p__Firmicutes; c__Clostridia; o__Clostridiales; f__Lachnospiraceae; g__Clostridium; s__	0.224206	265.236	0.451081	3.2962e-05	1.58025e-05
k__Bacteria; p__Firmicutes; c__Clostridia; o__Clostridiales; f__Ruminococcaceae; g__; s__	0.22518	266.387	0.452271	1.67675e-05	5.4313e-06
k__Bacteria; p__Firmicutes; c__Clostridia; o__Clostridiales; f__; g__; s__	0.226019	267.38	0.453186	1.66284e-05	5.14163e-06
k__Bacteria; p__Proteobacteria; c__Gammaproteobacteria; o__Pasteurellales; f__Pasteurellaceae; g__; s__	0.226167	267.555	0.452717	1.01618e-05	2.36227e-05
k__Bacteria; p__Firmicutes; c__Clostridia; o__Clostridiales; f__Lachnospiraceae; g__Clostridium; s__	0.226754	268.25	0.453124	1.63358e-05	4.44747e-06
k__Bacteria; p__Bacteroidetes; c__Bacteroidia; o__Bacteroidales; f__; g__; s__	0.226862	268.378	0.452577	0.000130996	0.000192003
k__Bacteria; p__Firmicutes; c__Clostridia; o__Clostridiales; f__Ruminococcaceae; g__Faecalibacterium; s__	0.227688	269.355	0.45346	2.79401e-05	1.10478e-05
k__Bacteria; p__Firmicutes; c__Clostridia; o__Clostridiales; f__; g__; s__	0.228017	269.744	0.453351	1.84414e-05	3.99946e-05
k__Bacteria; p__Firmicutes; c__Clostridia; o__Clostridiales; f__Veillonellaceae; g__Phascolarctobacterium; s__	0.228597	270.431	0.453743	2.90212e-05	9.6733e-06
k__Bacteria; p__Firmicutes; c__Clostridia; o__Clostridiales; f__Lachnospiraceae; g__; s__	0.228672	270.519	0.453131	4.94673e-05	2.48406e-05
k__Bacteria; p__Firmicutes; c__Clostridia; o__Clostridiales; f__Lachnospiraceae; g__Ruminococcus; s__Ruminococcusgnavus	0.228941	270.838	0.452906	4.17421e-05	1.15428e-05
k__Bacteria; p__Firmicutes; c__Clostridia; o__Clostridiales; f__Lachnospiraceae; g__; s__	0.231082	273.37	0.456377	0.0135988	0.00780702
k__Bacteria; p__Firmicutes; c__Clostridia; o__Clostridiales; f__Lachnospiraceae; g__; s__	0.231978	274.43	0.457384	0.000107752	5.91742e-05
k__Bacteria; p__Firmicutes; c__Clostridia; o__Clostridiales; f__Clostridiaceae; g__Clostridium; s__	0.232005	274.461	0.456675	9.9804e-05	0.0002223
k__Bacteria; p__Bacteroidetes; c__Bacteroidia; o__Bacteroidales; f__Porphyromonadaceae; g__Parabacteroides; s__Parabacteroidesdistasonis	0.233858	276.655	0.459559	1.32983e-05	2.98866e-05
k__Bacteria; p__Firmicutes; c__Clostridia; o__Clostridiales; f__Ruminococcaceae; g__; s__	0.234206	277.066	0.459479	2.0332e-05	7.64481e-06
k__Bacteria; p__Firmicutes; c__Clostridia; o__Clostridiales; f__Lachnospiraceae; g__; s__	0.235518	278.618	0.461288	1.29274e-05	4.57431e-06
k__Bacteria; p__Firmicutes; c__Clostridia; o__Clostridiales; f__Lachnospiraceae; g__; s__	0.23621	279.436	0.461878	0.000413462	0.000226632
k__Bacteria; p__Firmicutes; c__Clostridia; o__Clostridiales; f__Lachnospiraceae; g__Roseburia; s__	0.237016	280.39	0.462689	2.4385e-05	6.31662e-05
k__Bacteria; p__Bacteroidetes; c__Bacteroidia; o__Bacteroidales; f__Bacteroidaceae; g__Bacteroides; s__Bacteroidesfragilis	0.237637	281.124	0.463137	0.000396525	0.000247
k__Bacteria; p__Firmicutes; c__Clostridia; o__Clostridiales; f__Lachnospiraceae; g__; s__	0.240622	284.656	0.468184	0.00123242	1.19314e-05
k__Bacteria; p__Bacteroidetes; c__Bacteroidia; o__Bacteroidales; f__Rikenellaceae; g__Alistipes; s__Alistipesputredinis	0.240989	285.09	0.468128	0.00575098	0.00871861
k__Bacteria; p__Firmicutes; c__Clostridia; o__Clostridiales; f__Lachnospiraceae; g__Clostridium; s__	0.24139	285.564	0.468138	0.000106759	5.04837e-05
k__Bacteria; p__Firmicutes; c__Clostridia; o__Clostridiales; f__Lachnospiraceae; g__Clostridium; s__	0.243247	287.761	0.470968	0.000355899	1.87372e-05
k__Bacteria; p__Firmicutes; c__Clostridia; o__Clostridiales; f__Lachnospiraceae; g__; s__	0.24414	288.818	0.471925	0.000887652	3.26116e-05
k__Bacteria; p__Firmicutes; c__Clostridia; o__Clostridiales; f__Lachnospiraceae; g__; s__	0.244566	289.321	0.471976	8.41776e-05	2.07521e-05
k__Bacteria; p__Firmicutes; c__Clostridia; o__Clostridiales; f__ClostridialesFamilyXIII.IncertaeSedis; g__; s__	0.244982	289.814	0.47201	9.81928e-06	1.98399e-05
k__Bacteria; p__Tenericutes; c__Erysipelotrichi; o__Erysipelotrichales; f__Erysipelotrichaceae; g__Clostridium; s__	0.246606	291.734	0.474365	2.70117e-05	1.05845e-05
k__Bacteria; p__Proteobacteria; c__Gammaproteobacteria; o__Enterobacteriales; f__Enterobacteriaceae; g__; s__	0.246893	292.075	0.474147	4.30285e-05	1.86406e-05
k__Bacteria; p__Firmicutes; c__Clostridia; o__Clostridiales; f__Ruminococcaceae; g__Oscillospira; s__	0.247324	292.584	0.474204	1.94729e-05	7.97314e-06
k__Bacteria; p__Actinobacteria; c__Actinobacteria; o__Coriobacteriales; f__Coriobacteriaceae; g__Adlercreutzia; s__	0.247955	293.331	0.474646	3.86875e-05	1.54812e-05
k__Bacteria; p__Firmicutes; c__Clostridia; o__Clostridiales; f__Ruminococcaceae; g__; s__	0.248959	294.519	0.475798	4.47315e-05	7.76362e-05
k__Bacteria; p__Firmicutes; c__Clostridia; o__Clostridiales; f__Ruminococcaceae; g__Eubacterium; s__	0.249135	294.727	0.475366	0.000367494	0.00022647
k__Bacteria; p__Firmicutes; c__Clostridia; o__Clostridiales; f__Ruminococcaceae; g__Ruminococcus; s__	0.249515	295.176	0.475324	1.92699e-05	3.77238e-05
k__Bacteria; p__Firmicutes; c__Clostridia; o__Clostridiales; f__Ruminococcaceae; g__Faecalibacterium; s__	0.250734	296.618	0.476878	2.24388e-05	1.19672e-05
k__Bacteria; p__Firmicutes; c__Clostridia; o__Clostridiales; f__Lachnospiraceae; g__; s__	0.250958	296.884	0.476539	6.77811e-05	0.000113442
k__Bacteria; p__Bacteroidetes; c__Bacteroidia; o__Bacteroidales; f__Porphyromonadaceae; g__Parabacteroides; s__	0.250972	296.9	0.475801	1.71106e-05	6.96859e-06
k__Bacteria; p__Firmicutes; c__Clostridia; o__Clostridiales; f__Lachnospiraceae; g__; s__	0.252102	298.237	0.477179	5.08153e-05	8.26589e-05
k__Bacteria; p__Bacteroidetes; c__Bacteroidia; o__Bacteroidales; f__Bacteroidaceae; g__Bacteroides; s__	0.253728	300.161	0.47949	4.86246e-05	2.39933e-05
k__Bacteria; p__Firmicutes; c__Clostridia; o__Clostridiales; f__Lachnospiraceae; g__Clostridium; s__	0.254315	300.854	0.479831	2.04732e-05	4.09583e-05
k__Bacteria; p__Firmicutes; c__Clostridia; o__Clostridiales; f__Lachnospiraceae; g__Roseburia; s__	0.255109	301.794	0.480564	1.62398e-05	6.33793e-06
k__Bacteria; p__Firmicutes; c__Clostridia; o__Clostridiales; f__Lachnospiraceae; g__Ruminococcus; s__	0.256019	302.87	0.481511	4.70765e-05	2.54475e-05
k__Bacteria; p__Bacteroidetes; c__Bacteroidia; o__Bacteroidales; f__Porphyromonadaceae; g__; s__	0.256684	303.658	0.481996	2.22591e-05	4.25774e-05
k__Bacteria; p__Firmicutes; c__Clostridia; o__Clostridiales; f__Lachnospiraceae; g__Ruminococcus; s__	0.256908	303.922	0.481651	2.25324e-05	7.99322e-06
k__Bacteria; p__Firmicutes; c__Clostridia; o__Clostridiales; f__Lachnospiraceae; g__; s__	0.257024	304.059	0.481106	1.34785e-05	2.57557e-05
k__Bacteria; p__Proteobacteria; c__Gammaproteobacteria; o__Enterobacteriales; f__Enterobacteriaceae; g__; s__	0.257872	305.062	0.481931	1.47479e-05	3.13646e-05
k__Bacteria; p__Bacteroidetes; c__Bacteroidia; o__Bacteroidales; f__Bacteroidaceae; g__Bacteroides; s__Bacteroidesfragilis	0.258413	305.703	0.482181	1.09977e-05	2.22774e-05
k__Bacteria; p__Firmicutes; c__Clostridia; o__Clostridiales; f__Eubacteriaceae; g__Eubacterium; s__Eubacteriumlimosum	0.258763	306.117	0.482073	7.28037e-05	0.000165455
k__Bacteria; p__Firmicutes; c__Clostridia; o__Clostridiales; f__Ruminococcaceae; g__; s__	0.259229	306.668	0.482182	2.56073e-05	5.5116e-05
k__Bacteria; p__Firmicutes; c__Clostridia; o__Clostridiales; f__Lachnospiraceae; g__; s__	0.262193	310.174	0.48693	6.40097e-05	1.94258e-05
k__Bacteria; p__Firmicutes; c__Clostridia; o__Clostridiales; f__Ruminococcaceae; g__Ruminococcus; s__Ruminococcusflavefaciens	0.266967	315.822	0.495019	0.000151865	5.23579e-05
k__Bacteria; p__Firmicutes; c__Clostridia; o__Clostridiales; f__Ruminococcaceae; g__Faecalibacterium; s__	0.267871	316.891	0.495917	1.68839e-05	2.85193e-05
k__Bacteria; p__Firmicutes; c__Clostridia; o__Clostridiales; f__Lachnospiraceae; g__; s__	0.26836	317.47	0.496047	0.000180592	1.30905e-05
k__Bacteria; p__Bacteroidetes; c__Bacteroidia; o__Bacteroidales; f__Bacteroidaceae; g__Bacteroides; s__	0.268847	318.046	0.496172	1.5348e-05	2.58894e-05
k__Bacteria; p__Fusobacteria; c__Fusobacteria; o__Fusobacteriales; f__Fusobacteriaceae; g__Fusobacterium; s__	0.270642	320.17	0.498706	6.29137e-05	0.000138893
k__Bacteria; p__Firmicutes; c__Clostridia; o__Clostridiales; f__; g__; s__	0.271618	321.324	0.499726	2.94755e-05	9.5877e-06
k__Bacteria; p__Firmicutes; c__Clostridia; o__Clostridiales; f__Lachnospiraceae; g__Ruminococcus; s__Ruminococcusgnavus	0.272793	322.714	0.501108	2.57854e-05	1.32983e-05
k__Bacteria; p__Firmicutes; c__Clostridia; o__Clostridiales; f__Lachnospiraceae; g__Clostridium; s__	0.273726	323.817	0.502042	4.06232e-05	6.28907e-05
k__Bacteria; p__Bacteroidetes; c__Bacteroidia; o__Bacteroidales; f__Bacteroidaceae; g__Bacteroides; s__	0.274672	324.938	0.502999	2.1366e-05	1.03834e-05
k__Bacteria; p__Bacteroidetes; c__Bacteroidia; o__Bacteroidales; f__Rikenellaceae; g__Alistipes; s__	0.275047	325.381	0.502907	0.000431535	0.000609719
k__Bacteria; p__Firmicutes; c__Clostridia; o__Clostridiales; f__Ruminococcaceae; g__Faecalibacterium; s__	0.276035	326.549	0.503934	0.0018765	0.00146741
k__Bacteria; p__Firmicutes; c__Clostridia; o__Clostridiales; f__Lachnospiraceae; g__; s__	0.27771	328.531	0.506211	2.70353e-05	1.25188e-05
k__Bacteria; p__Firmicutes; c__Clostridia; o__Clostridiales; f__Ruminococcaceae; g__; s__	0.278652	329.645	0.507146	8.3402e-05	3.06804e-05
k__Bacteria; p__Firmicutes; c__Clostridia; o__Clostridiales; f__Lachnospiraceae; g__Blautia; s__Blautiaproducta	0.281915	333.506	0.512298	1.67844e-05	7.6258e-06
k__Bacteria; p__Bacteroidetes; c__Bacteroidia; o__Bacteroidales; f__Bacteroidaceae; g__Bacteroides; s__	0.282379	334.055	0.512354	0.000923992	0.000645937
k__Bacteria; p__Firmicutes; c__Clostridia; o__Clostridiales; f__Lachnospiraceae; g__Clostridium; s__	0.283004	334.794	0.512701	2.54402e-05	1.15234e-05
k__Bacteria; p__Firmicutes; c__Clostridia; o__Clostridiales; f__Lachnospiraceae; g__Blautia; s__	0.283193	335.017	0.512258	3.88197e-05	2.02669e-05
k__Bacteria; p__Bacteroidetes; c__Bacteroidia; o__Bacteroidales; f__Bacteroidaceae; g__Bacteroides; s__	0.286862	339.358	0.518104	1.88911e-05	3.08964e-05
k__Bacteria; p__Tenericutes; c__Erysipelotrichi; o__Erysipelotrichales; f__Erysipelotrichaceae; g__Clostridium; s__Clostridiumramosum	0.287465	340.071	0.518401	1.2055e-05	2.58331e-05
k__Bacteria; p__Firmicutes; c__Clostridia; o__Clostridiales; f__Lachnospiraceae; g__; s__	0.28796	340.657	0.518504	0.000112127	0.00021111
k__Bacteria; p__Firmicutes; c__Clostridia; o__Clostridiales; f__Ruminococcaceae; g__Faecalibacterium; s__	0.289446	342.414	0.520386	3.37051e-05	5.09189e-05
k__Bacteria; p__Proteobacteria; c__Betaproteobacteria; o__Burkholderiales; f__Alcaligenaceae; g__; s__	0.289532	342.516	0.519751	2.24052e-05	9.71713e-06
k__Bacteria; p__Firmicutes; c__Clostridia; o__Clostridiales; f__Lachnospiraceae; g__Ruminococcus; s__	0.290374	343.512	0.520473	0.000267733	0.000110718
k__Bacteria; p__Firmicutes; c__Clostridia; o__Clostridiales; f__Lachnospiraceae; g__; s__	0.292182	345.651	0.522921	2.62544e-05	1.27995e-05
k__Bacteria; p__Firmicutes; c__Clostridia; o__Clostridiales; f__Veillonellaceae; g__Dialister; s__Dialisterinvisus	0.299455	354.256	0.53513	1.6546e-05	3.33209e-05
k__Bacteria; p__Firmicutes; c__Clostridia; o__Clostridiales; f__Lachnospiraceae; g__; s__	0.301313	356.453	0.537637	1.56233e-05	7.04082e-06
k__Bacteria; p__Bacteroidetes; c__Bacteroidia; o__Bacteroidales; f__Bacteroidaceae; g__Bacteroides; s__	0.302142	357.434	0.538305	2.11442e-05	1.11677e-05
k__Bacteria; p__Firmicutes; c__Clostridia; o__Clostridiales; f__Lachnospiraceae; g__Roseburia; s__Eubacteriumrectale	0.30261	357.988	0.538328	2.81503e-05	1.31304e-05
k__Bacteria; p__Firmicutes; c__Clostridia; o__Clostridiales; f__Lachnospiraceae; g__; s__	0.303695	359.271	0.539447	2.85622e-05	1.41392e-05
k__Bacteria; p__Tenericutes; c__Erysipelotrichi; o__Erysipelotrichales; f__Erysipelotrichaceae; g__Clostridium; s__Clostridiumspiroforme	0.305092	360.924	0.541115	1.40939e-05	2.51907e-05
k__Bacteria; p__Bacteroidetes; c__Bacteroidia; o__Bacteroidales; f__Bacteroidaceae; g__Bacteroides; s__	0.305441	361.336	0.540923	2.27369e-05	4.12736e-05
k__Bacteria; p__Firmicutes; c__Clostridia; o__Clostridiales; f__Lachnospiraceae; g__Roseburia; s__Eubacteriumrectale	0.305633	361.564	0.540454	0.000124854	6.80231e-05
k__Bacteria; p__Bacteroidetes; c__Bacteroidia; o__Bacteroidales; f__Bacteroidaceae; g__Bacteroides; s__Bacteroidesfragilis	0.305886	361.863	0.540093	2.06442e-05	8.97812e-06
k__Bacteria; p__Bacteroidetes; c__Bacteroidia; o__Bacteroidales; f__Bacteroidaceae; g__Bacteroides; s__Bacteroidesfragilis	0.306091	362.105	0.53965	3.00733e-05	1.68158e-05
k__Bacteria; p__Firmicutes; c__Clostridia; o__Clostridiales; f__Lachnospiraceae; g__Blautia; s__	0.306366	362.431	0.539332	3.53041e-05	1.6285e-05
k__Bacteria; p__Firmicutes; c__Clostridia; o__Clostridiales; f__Ruminococcaceae; g__; s__	0.306444	362.523	0.538667	4.07011e-05	2.60037e-05
k__Bacteria; p__Bacteroidetes; c__Bacteroidia; o__Bacteroidales; f__Bacteroidaceae; g__Bacteroides; s__	0.306567	362.669	0.538085	3.21758e-05	4.62421e-05
k__Bacteria; p__Firmicutes; c__Clostridia; o__Clostridiales; f__Ruminococcaceae; g__; s__	0.306702	362.828	0.537524	6.14995e-05	1.63946e-05
k__Bacteria; p__Firmicutes; c__Clostridia; o__Clostridiales; f__Ruminococcaceae; g__; s__	0.306958	363.131	0.537176	0.000208143	3.53634e-05
k__Bacteria; p__Firmicutes; c__Clostridia; o__Clostridiales; f__Ruminococcaceae; g__Clostridium; s__Clostridiumorbiscindens	0.307345	363.59	0.53706	6.25333e-05	0.000101439
k__Bacteria; p__Firmicutes; c__Clostridia; o__Clostridiales; f__Lachnospiraceae; g__; s__	0.308174	364.57	0.537714	1.06033e-05	1.99597e-05
k__Bacteria; p__Bacteroidetes; c__Bacteroidia; o__Bacteroidales; f__Prevotellaceae; g__Prevotella; s__	0.308553	365.018	0.537582	0.000332789	0.000703238
k__Bacteria; p__Proteobacteria; c__Gammaproteobacteria; o__Pasteurellales; f__Pasteurellaceae; g__; s__	0.312998	370.277	0.544525	1.08289e-05	2.19988e-05
k__Bacteria; p__Firmicutes; c__Clostridia; o__Clostridiales; f__Lachnospiraceae; g__Clostridium; s__	0.313463	370.826	0.544532	9.17005e-05	5.31346e-05
k__Bacteria; p__Firmicutes; c__Clostridia; o__Clostridiales; f__Ruminococcaceae; g__Faecalibacterium; s__	0.316988	374.997	0.549849	3.9446e-05	5.86363e-05
k__Bacteria; p__Proteobacteria; c__Gammaproteobacteria; o__Pasteurellales; f__Pasteurellaceae; g__Haemophilus; s__Haemophilusparainfluenzae	0.318027	376.226	0.550844	0.00011222	5.15123e-05
k__Bacteria; p__Firmicutes; c__Clostridia; o__Clostridiales; f__Ruminococcaceae; g__Faecalibacterium; s__	0.318373	376.635	0.550636	1.77232e-05	8.69781e-06
k__Bacteria; p__Firmicutes; c__Clostridia; o__Clostridiales; f__Lachnospiraceae; g__Clostridium; s__	0.319082	377.475	0.551058	7.24682e-05	2.49585e-05
k__Bacteria; p__Bacteroidetes; c__Bacteroidia; o__Bacteroidales; f__Porphyromonadaceae; g__Parabacteroides; s__	0.319667	378.166	0.551262	9.17245e-06	1.74426e-05
k__Bacteria; p__Bacteroidetes; c__Bacteroidia; o__Bacteroidales; f__; g__; s__	0.320424	379.061	0.551763	4.37365e-05	1.78626e-05
k__Bacteria; p__Firmicutes; c__Clostridia; o__Clostridiales; f__Lachnospiraceae; g__Lachnospira; s__	0.321018	379.764	0.551983	0.00184681	0.00127216
k__Bacteria; p__Firmicutes; c__Clostridia; o__Clostridiales; f__Ruminococcaceae; g__Oscillospira; s__	0.321647	380.508	0.552261	1.96422e-05	8.48582e-06
k__Bacteria; p__Firmicutes; c__Clostridia; o__Clostridiales; f__Ruminococcaceae; g__; s__	0.323134	382.267	0.55401	0.000107795	7.02876e-05
k__Bacteria; p__Bacteroidetes; c__Bacteroidia; o__Bacteroidales; f__Bacteroidaceae; g__Bacteroides; s__	0.323619	382.842	0.55404	3.73384e-05	2.16537e-05
k__Bacteria; p__Firmicutes; c__Clostridia; o__Clostridiales; f__Ruminococcaceae; g__Clostridium; s__	0.323881	383.152	0.553687	1.78999e-05	7.27032e-06
k__Bacteria; p__Firmicutes; c__Clostridia; o__Clostridiales; f__Lachnospiraceae; g__; s__	0.324226	383.559	0.553476	2.27368e-05	4.08028e-05
k__Bacteria; p__Verrucomicrobia; c__Verrucomicrobiae; o__Verrucomicrobiales; f__Verrucomicrobiaceae; g__Akkermansia; s__Akkermansiamuciniphila	0.32683	386.64	0.557119	0.00137124	0.000744545
k__Bacteria; p__Firmicutes; c__Clostridia; o__Clostridiales; f__Lachnospiraceae; g__; s__	0.327576	387.523	0.557587	0.000234532	0.000354529
k__Bacteria; p__Firmicutes; c__Clostridia; o__Clostridiales; f__Lachnospiraceae; g__Ruminococcus; s__Ruminococcusgnavus	0.328207	388.269	0.557858	0.000103681	6.27625e-05
k__Bacteria; p__Bacteroidetes; c__Bacteroidia; o__Bacteroidales; f__Bacteroidaceae; g__Bacteroides; s__	0.328231	388.297	0.557098	3.63516e-05	5.41332e-05
k__Bacteria; p__Actinobacteria; c__Actinobacteria; o__Coriobacteriales; f__Coriobacteriaceae; g__Atopobium; s__	0.328356	388.445	0.556511	2.70473e-05	4.52067e-05
k__Bacteria; p__Firmicutes; c__Clostridia; o__Clostridiales; f__Lachnospiraceae; g__; s__	0.328381	388.474	0.555757	2.33299e-05	3.81931e-05
k__Bacteria; p__Firmicutes; c__Clostridia; o__Clostridiales; f__Lachnospiraceae; g__; s__	0.328773	388.939	0.555627	2.52143e-05	1.22202e-05
k__Bacteria; p__Tenericutes; c__Erysipelotrichi; o__Erysipelotrichales; f__Erysipelotrichaceae; g__Clostridium; s__Clostridiumramosum	0.330403	390.866	0.557584	2.84869e-05	5.6773e-05
k__Bacteria; p__Bacteroidetes; c__Bacteroidia; o__Bacteroidales; f__Bacteroidaceae; g__Bacteroides; s__	0.330473	390.95	0.556909	0.00015751	0.000122626
k__Bacteria; p__Firmicutes; c__Clostridia; o__Clostridiales; f__Lachnospiraceae; g__Clostridium; s__	0.330664	391.176	0.556437	0.000186654	0.000343329
k__Bacteria; p__Firmicutes; c__Clostridia; o__Clostridiales; f__Lachnospiraceae; g__Ruminococcus; s__Ruminococcusgnavus	0.331309	391.939	0.556731	7.2738e-05	4.65538e-05
k__Bacteria; p__Proteobacteria; c__Gammaproteobacteria; o__Enterobacteriales; f__Enterobacteriaceae; g__Rahnella; s__	0.334303	395.481	0.560966	6.9854e-05	0.000111395
k__Bacteria; p__Bacteroidetes; c__Bacteroidia; o__Bacteroidales; f__Bacteroidaceae; g__Bacteroides; s__	0.335258	396.611	0.561771	5.12419e-05	3.31763e-05
k__Bacteria; p__Bacteroidetes; c__Bacteroidia; o__Bacteroidales; f__Bacteroidaceae; g__Bacteroides; s__	0.335883	397.349	0.562022	1.59572e-05	2.65247e-05
k__Bacteria; p__Firmicutes; c__Clostridia; o__Clostridiales; f__Veillonellaceae; g__Phascolarctobacterium; s__	0.339601	401.749	0.567441	0.00454658	0.00328654
k__Bacteria; p__Firmicutes; c__Clostridia; o__Clostridiales; f__Lachnospiraceae; g__; s__	0.339964	402.177	0.567246	4.48614e-05	2.45708e-05
k__Bacteria; p__Bacteroidetes; c__Bacteroidia; o__Bacteroidales; f__Bacteroidaceae; g__Bacteroides; s__	0.340183	402.437	0.566813	0.00202503	0.00123775
k__Bacteria; p__Bacteroidetes; c__Bacteroidia; o__Bacteroidales; f__Bacteroidaceae; g__Bacteroides; s__Bacteroidesfragilis	0.341123	403.548	0.567578	3.93781e-05	2.37302e-05
k__Bacteria; p__Firmicutes; c__Clostridia; o__Clostridiales; f__Lachnospiraceae; g__; s__	0.341879	404.443	0.568038	1.83323e-05	3.387e-05
k__Bacteria; p__Firmicutes; c__Clostridia; o__Clostridiales; f__Lachnospiraceae; g__Roseburia; s__	0.342317	404.961	0.567968	2.52644e-05	1.38221e-05
k__Bacteria; p__Actinobacteria; c__Actinobacteria; o__Coriobacteriales; f__; g__; s__	0.342506	405.185	0.567486	4.35212e-05	2.45708e-05
k__Bacteria; p__Firmicutes; c__Clostridia; o__Clostridiales; f__Lachnospiraceae; g__Ruminococcus; s__	0.342513	405.193	0.566703	9.91184e-05	3.81995e-05
k__Bacteria; p__Bacteroidetes; c__Bacteroidia; o__Bacteroidales; f__Bacteroidaceae; g__Bacteroides; s__	0.346373	409.759	0.572289	8.30555e-05	0.000108478
k__Bacteria; p__Proteobacteria; c__Gammaproteobacteria; o__Chromatiales; f__; g__; s__	0.346565	409.987	0.571808	4.28891e-05	6.77464e-05
k__Bacteria; p__Proteobacteria; c__Gammaproteobacteria; o__Pasteurellales; f__Pasteurellaceae; g__Actinobacillus; s__	0.346821	410.289	0.571434	7.98926e-05	2.41713e-05
k__Bacteria; p__Bacteroidetes; c__Bacteroidia; o__Bacteroidales; f__Rikenellaceae; g__Alistipes; s__	0.347464	411.05	0.571697	9.51031e-06	1.76943e-05
k__Bacteria; p__Firmicutes; c__Clostridia; o__Clostridiales; f__Lachnospiraceae; g__Ruminococcus; s__Ruminococcusgnavus	0.347607	411.219	0.571137	2.03423e-05	8.85408e-06
k__Bacteria; p__Proteobacteria; c__Epsilonproteobacteria; o__Campylobacterales; f__Campylobacteraceae; g__Campylobacter; s__Campylobacterconcisus	0.348715	412.53	0.572164	2.56582e-05	1.10349e-05
k__Bacteria; p__Bacteroidetes; c__Bacteroidia; o__Bacteroidales; f__Porphyromonadaceae; g__Parabacteroides; s__Parabacteroidesdistasonis	0.351594	415.935	0.576087	2.62104e-05	4.2732e-05
k__Bacteria; p__Firmicutes; c__Clostridia; o__Clostridiales; f__Ruminococcaceae; g__Clostridium; s__	0.353608	418.318	0.578586	1.69773e-05	8.82676e-06
k__Bacteria; p__Firmicutes; c__Clostridia; o__Clostridiales; f__Ruminococcaceae; g__Ruminococcus; s__	0.354454	419.319	0.57917	1.88509e-05	3.15388e-05
k__Bacteria; p__Firmicutes; c__Clostridia; o__Clostridiales; f__Lachnospiraceae; g__Clostridium; s__	0.355222	420.228	0.579625	3.3776e-05	2.18796e-05
k__Bacteria; p__Tenericutes; c__Erysipelotrichi; o__Erysipelotrichales; f__Erysipelotrichaceae; g__Allobaculum; s__	0.355988	421.134	0.580075	3.19521e-05	8.54446e-06
k__Bacteria; p__Firmicutes; c__Clostridia; o__Clostridiales; f__Lachnospiraceae; g__; s__	0.358031	423.55	0.5826	1.99035e-05	1.07823e-05
k__Bacteria; p__Firmicutes; c__Clostridia; o__Clostridiales; f__Lachnospiraceae; g__Clostridium; s__	0.358058	423.583	0.581844	9.45863e-05	6.8052e-05
k__Bacteria; p__Bacteroidetes; c__Bacteroidia; o__Bacteroidales; f__; g__; s__	0.358991	424.686	0.58256	0.000404847	0.000211944
k__Bacteria; p__Firmicutes; c__Clostridia; o__Clostridiales; f__Lachnospiraceae; g__Ruminococcus; s__	0.360492	426.462	0.584194	4.49284e-05	1.59503e-05
k__Bacteria; p__Firmicutes; c__Clostridia; o__Clostridiales; f__Ruminococcaceae; g__Bacteroides; s__Bacteroidescapillosus	0.360752	426.77	0.583817	4.45853e-05	2.43256e-05
k__Bacteria; p__Firmicutes; c__Clostridia; o__Clostridiales; f__Lachnospiraceae; g__; s__	0.362101	428.366	0.585199	3.23615e-05	2.01281e-05
k__Bacteria; p__Firmicutes; c__Clostridia; o__Clostridiales; f__Ruminococcaceae; g__Faecalibacterium; s__	0.362717	429.094	0.585394	5.65133e-05	3.59956e-05
k__Bacteria; p__Bacteroidetes; c__Bacteroidia; o__Bacteroidales; f__Porphyromonadaceae; g__Parabacteroides; s__Parabacteroidesdistasonis	0.362957	429.378	0.584984	0.000218773	0.000297315
k__Bacteria; p__Firmicutes; c__Clostridia; o__Clostridiales; f__Lachnospiraceae; g__Coprococcus; s__	0.36363	430.175	0.585272	3.59795e-05	1.89481e-05
k__Bacteria; p__Firmicutes; c__Clostridia; o__Clostridiales; f__Ruminococcaceae; g__Clostridium; s__Clostridiumleptum	0.364572	431.288	0.585989	0.000269399	0.000114942
k__Bacteria; p__Firmicutes; c__Clostridia; o__Clostridiales; f__Lachnospiraceae; g__; s__	0.369131	436.682	0.592513	3.35318e-05	1.86124e-05
k__Bacteria; p__Firmicutes; c__Clostridia; o__Clostridiales; f__Lachnospiraceae; g__Clostridium; s__	0.369687	437.339	0.592601	3.65494e-05	1.90177e-05
k__Bacteria; p__Firmicutes; c__Clostridia; o__Clostridiales; f__; g__; s__	0.370622	438.446	0.593296	0.00147343	0.00115974
k__Bacteria; p__Firmicutes; c__Clostridia; o__Clostridiales; f__Peptococcaceae; g__; s__	0.373567	441.93	0.597203	0.000531897	0.000140885
k__Bacteria; p__Firmicutes; c__Clostridia; o__Clostridiales; f__; g__; s__	0.373646	442.023	0.596523	0.000113451	5.38306e-05
k__Bacteria; p__Firmicutes; c__Clostridia; o__Clostridiales; f__Lachnospiraceae; g__; s__	0.375053	443.688	0.597962	6.46216e-05	3.56476e-05
k__Bacteria; p__Firmicutes; c__Clostridia; o__Clostridiales; f__Lachnospiraceae; g__Clostridium; s__	0.37568	444.43	0.598156	1.79979e-05	1.01633e-05
k__Bacteria; p__Bacteroidetes; c__Bacteroidia; o__Bacteroidales; f__Bacteroidaceae; g__Bacteroides; s__	0.376516	445.418	0.59868	1.42798e-05	2.28855e-05
k__Bacteria; p__Bacteroidetes; c__Bacteroidia; o__Bacteroidales; f__Prevotellaceae; g__Prevotella; s__	0.376964	445.948	0.598588	0.00217186	0.000608947
k__Bacteria; p__Firmicutes; c__Clostridia; o__Clostridiales; f__; g__; s__	0.379176	448.565	0.601294	2.21775e-05	1.13196e-05
k__Bacteria; p__Firmicutes; c__Clostridia; o__Clostridiales; f__Lachnospiraceae; g__Clostridium; s__	0.379753	449.248	0.601403	7.26014e-05	4.02462e-05
k__Bacteria; p__Bacteroidetes; c__Bacteroidia; o__Bacteroidales; f__Bacteroidaceae; g__Bacteroides; s__Bacteroidesfragilis	0.381318	451.099	0.603074	3.50431e-05	2.19613e-05
k__Bacteria; p__Proteobacteria; c__Gammaproteobacteria; o__Pasteurellales; f__Pasteurellaceae; g__; s__	0.381984	451.888	0.603321	3.43641e-05	5.20397e-05
k__Bacteria; p__Firmicutes; c__Clostridia; o__Clostridiales; f__Catabacteriaceae; g__; s__	0.384546	454.918	0.606557	0.000501131	0.000906534
k__Bacteria; p__Firmicutes; c__Clostridia; o__Clostridiales; f__Ruminococcaceae; g__Eubacterium; s__	0.386018	456.659	0.608068	0.000180921	0.000334416
k__Bacteria; p__Firmicutes; c__Clostridia; o__Clostridiales; f__Ruminococcaceae; g__; s__	0.386415	457.129	0.607884	0.000212215	0.000133512
k__Bacteria; p__Firmicutes; c__Clostridia; o__Clostridiales; f__Lachnospiraceae; g__Clostridium; s__	0.387104	457.944	0.608159	5.03827e-05	7.11656e-05
k__Bacteria; p__Firmicutes; c__Clostridia; o__Clostridiales; f__Ruminococcaceae; g__Faecalibacterium; s__	0.387193	458.05	0.607493	1.60023e-05	8.94111e-06
k__Bacteria; p__Firmicutes; c__Clostridia; o__Clostridiales; f__Lachnospiraceae; g__Ruminococcus; s__	0.391754	463.445	0.613834	1.3996e-05	2.69116e-05
k__Bacteria; p__Firmicutes; c__Bacilli; o__Lactobacillales; f__Carnobacteriaceae; g__Granulicatella; s__Granulicatellaelegans	0.393692	465.737	0.616054	3.26554e-05	1.24245e-05
k__Bacteria; p__Firmicutes; c__Clostridia; o__Clostridiales; f__Ruminococcaceae; g__Clostridium; s__	0.395031	467.322	0.617334	5.21482e-05	7.55916e-05
k__Bacteria; p__Bacteroidetes; c__Bacteroidia; o__Bacteroidales; f__Bacteroidaceae; g__Bacteroides; s__	0.395046	467.34	0.616543	5.0487e-05	6.63956e-05
k__Bacteria; p__Proteobacteria; c__Gammaproteobacteria; o__Enterobacteriales; f__Enterobacteriaceae; g__; s__	0.396087	468.571	0.617354	1.05931e-05	1.81937e-05
k__Bacteria; p__Tenericutes; c__Erysipelotrichi; o__Erysipelotrichales; f__Erysipelotrichaceae; g__; s__Eubacteriumdolichum	0.396454	469.005	0.617112	9.6079e-05	3.16543e-05
k__Bacteria; p__Bacteroidetes; c__Bacteroidia; o__Bacteroidales; f__Bacteroidaceae; g__Bacteroides; s__Bacteroidescaccae	0.397062	469.724	0.617246	6.48648e-05	8.47096e-05
k__Bacteria; p__Firmicutes; c__Clostridia; o__Clostridiales; f__Lachnospiraceae; g__Ruminococcus; s__	0.398494	471.418	0.618659	1.45256e-05	7.98424e-06
k__Bacteria; p__Firmicutes; c__Clostridia; o__Clostridiales; f__Lachnospiraceae; g__Eubacterium; s__	0.39872	471.686	0.618199	2.69283e-05	1.33326e-05
k__Bacteria; p__Firmicutes; c__Clostridia; o__Clostridiales; f__Clostridiaceae; g__Clostridium; s__	0.403376	477.194	0.624599	3.58646e-05	9.97568e-06
k__Bacteria; p__Bacteroidetes; c__Bacteroidia; o__Bacteroidales; f__Porphyromonadaceae; g__Parabacteroides; s__	0.405638	479.87	0.627281	0.000200862	7.85731e-05
k__Bacteria; p__Firmicutes; c__Clostridia; o__Clostridiales; f__Lachnospiraceae; g__Coprococcus; s__	0.406717	481.146	0.628128	1.81954e-05	9.6228e-06
k__Bacteria; p__Firmicutes; c__Clostridia; o__Clostridiales; f__Lachnospiraceae; g__; s__	0.407495	482.067	0.62851	4.77738e-05	7.07888e-05
k__Bacteria; p__Firmicutes; c__Clostridia; o__Clostridiales; f__Lachnospiraceae; g__; s__	0.407744	482.361	0.628074	8.59305e-05	4.99563e-05
k__Bacteria; p__Firmicutes; c__Bacilli; o__Lactobacillales; f__Streptococcaceae; g__Streptococcus; s__	0.408685	483.474	0.628705	3.10028e-05	1.30232e-05
k__Bacteria; p__Firmicutes; c__Clostridia; o__Clostridiales; f__Ruminococcaceae; g__; s__	0.412227	487.664	0.63333	1.1884e-05	2.07063e-05
k__Bacteria; p__Firmicutes; c__Clostridia; o__Clostridiales; f__Ruminococcaceae; g__Faecalibacterium; s__	0.414281	490.095	0.635661	7.9884e-05	0.000100116
k__Bacteria; p__Firmicutes; c__Clostridia; o__Clostridiales; f__Lachnospiraceae; g__; s__	0.414755	490.655	0.635564	1.16165e-05	1.8701e-05
k__Bacteria; p__Proteobacteria; c__Gammaproteobacteria; o__Pasteurellales; f__Pasteurellaceae; g__; s__	0.415636	491.697	0.63609	2.65198e-05	1.64445e-05
k__Bacteria; p__Bacteroidetes; c__Bacteroidia; o__Bacteroidales; f__Bacteroidaceae; g__Bacteroides; s__	0.415775	491.861	0.63548	4.60438e-05	3.33998e-05
k__Bacteria; p__Bacteroidetes; c__Bacteroidia; o__Bacteroidales; f__Bacteroidaceae; g__Bacteroides; s__Bacteroidesfragilis	0.415882	491.989	0.634824	1.538e-05	8.37455e-06
k__Bacteria; p__Firmicutes; c__Clostridia; o__Clostridiales; f__Lachnospiraceae; g__; s__	0.417969	494.458	0.637188	6.5935e-05	3.68998e-05
k__Bacteria; p__Firmicutes; c__Clostridia; o__Clostridiales; f__Lachnospiraceae; g__Lachnobacterium; s__	0.420138	497.024	0.63967	5.50724e-05	2.28198e-05
k__Bacteria; p__Proteobacteria; c__Gammaproteobacteria; o__Pasteurellales; f__Pasteurellaceae; g__Actinobacillus; s__Haemophilusparahaemolyticus	0.420523	497.479	0.639433	8.22362e-05	0.000174018
k__Bacteria; p__Firmicutes; c__Clostridia; o__Clostridiales; f__Lachnospiraceae; g__; s__	0.422916	500.31	0.642247	1.87968e-05	1.04093e-05
k__Bacteria; p__Firmicutes; c__Clostridia; o__Clostridiales; f__; g__; s__	0.422917	500.311	0.641424	0.000204783	0.000362618
k__Bacteria; p__Bacteroidetes; c__Bacteroidia; o__Bacteroidales; f__Bacteroidaceae; g__Bacteroides; s__	0.424582	502.281	0.643125	5.52677e-05	3.26346e-05
k__Bacteria; p__Firmicutes; c__Clostridia; o__Clostridiales; f__Ruminococcaceae; g__; s__	0.424753	502.483	0.642562	2.24193e-05	1.34544e-05
k__Bacteria; p__Bacteroidetes; c__Bacteroidia; o__Bacteroidales; f__Bacteroidaceae; g__Bacteroides; s__	0.42538	503.224	0.642688	0.000121159	9.85624e-05
k__Bacteria; p__Firmicutes; c__Clostridia; o__Clostridiales; f__Lachnospiraceae; g__Coprococcus; s__	0.42879	507.259	0.647014	0.000150182	8.99081e-05
k__Bacteria; p__Firmicutes; c__Clostridia; o__Clostridiales; f__Ruminococcaceae; g__; s__	0.431514	510.481	0.650294	1.82689e-05	2.98814e-05
k__Bacteria; p__Firmicutes; c__Clostridia; o__Clostridiales; f__Lachnospiraceae; g__; s__	0.432185	511.275	0.650477	1.71407e-05	9.437e-06
k__Bacteria; p__Proteobacteria; c__Betaproteobacteria; o__Burkholderiales; f__Alcaligenaceae; g__; s__	0.435543	515.247	0.654698	1.64855e-05	9.02178e-06
k__Bacteria; p__Bacteroidetes; c__Bacteroidia; o__Bacteroidales; f__Prevotellaceae; g__Prevotella; s__	0.436115	515.925	0.654727	4.39724e-05	7.77752e-05
k__Bacteria; p__Firmicutes; c__Clostridia; o__Clostridiales; f__Veillonellaceae; g__Dialister; s__Dialisterinvisus	0.442354	523.305	0.66325	2.688e-05	4.37117e-05
k__Bacteria; p__Bacteroidetes; c__Bacteroidia; o__Bacteroidales; f__Bacteroidaceae; g__Bacteroides; s__	0.442624	523.625	0.662816	1.7877e-05	8.88237e-06
k__Bacteria; p__Tenericutes; c__Erysipelotrichi; o__Erysipelotrichales; f__Erysipelotrichaceae; g__Clostridium; s__Clostridiumspiroforme	0.443704	524.902	0.663593	0.000104352	7.11109e-05
k__Bacteria; p__Bacteroidetes; c__Bacteroidia; o__Bacteroidales; f__Bacteroidaceae; g__Bacteroides; s__	0.445293	526.782	0.665128	2.48674e-05	1.53003e-05
k__Bacteria; p__Bacteroidetes; c__Bacteroidia; o__Bacteroidales; f__Porphyromonadaceae; g__Parabacteroides; s__	0.446216	527.873	0.665666	4.75177e-05	3.27451e-05
k__Bacteria; p__Firmicutes; c__Clostridia; o__Clostridiales; f__Ruminococcaceae; g__Faecalibacterium; s__	0.446996	528.797	0.665991	0.0147865	0.0115666
k__Bacteria; p__Firmicutes; c__Clostridia; o__Clostridiales; f__Lachnospiraceae; g__Clostridium; s__	0.450162	532.542	0.669864	0.000442074	0.000195319
k__Bacteria; p__Firmicutes; c__Clostridia; o__Clostridiales; f__Ruminococcaceae; g__Faecalibacterium; s__	0.450781	533.273	0.669941	2.09885e-05	1.1031e-05
k__Bacteria; p__Proteobacteria; c__Gammaproteobacteria; o__Pasteurellales; f__Pasteurellaceae; g__Actinobacillus; s__	0.45305	535.958	0.67247	0.000207012	0.00011711
k__Bacteria; p__Firmicutes; c__Clostridia; o__Clostridiales; f__Ruminococcaceae; g__Faecalibacterium; s__	0.453626	536.639	0.67248	1.93686e-05	3.03208e-05
k__Bacteria; p__Firmicutes; c__Clostridia; o__Clostridiales; f__; g__; s__	0.456094	539.559	0.675293	0.000902052	0.00125764
k__Bacteria; p__Firmicutes; c__Clostridia; o__Clostridiales; f__Lachnospiraceae; g__; s__	0.456203	539.689	0.674611	1.45672e-05	2.18615e-05
k__Bacteria; p__Firmicutes; c__Clostridia; o__Clostridiales; f__Ruminococcaceae; g__Clostridium; s__Clostridiumorbiscindens	0.457011	540.644	0.674961	0.00248261	0.00308255
k__Bacteria; p__Firmicutes; c__Clostridia; o__Clostridiales; f__Ruminococcaceae; g__Faecalibacterium; s__	0.458605	542.53	0.676471	0.00128248	0.00110665
k__Bacteria; p__Bacteroidetes; c__Bacteroidia; o__Bacteroidales; f__Bacteroidaceae; g__Bacteroides; s__	0.460217	544.437	0.678004	2.63412e-05	1.45021e-05
k__Bacteria; p__Firmicutes; c__Clostridia; o__Clostridiales; f__Lachnospiraceae; g__; s__	0.460255	544.482	0.677217	1.14117e-05	1.91806e-05
k__Bacteria; p__Bacteroidetes; c__Bacteroidia; o__Bacteroidales; f__Bacteroidaceae; g__Bacteroides; s__Bacteroidesfragilis	0.460753	545.07	0.677106	1.61379e-05	8.39631e-06
k__Bacteria; p__Firmicutes; c__Clostridia; o__Clostridiales; f__Lachnospiraceae; g__Ruminococcus; s__Ruminococcusgnavus	0.460945	545.298	0.676549	8.88809e-05	5.11912e-05
k__Bacteria; p__Firmicutes; c__Clostridia; o__Clostridiales; f__Ruminococcaceae; g__Faecalibacterium; s__	0.461989	546.533	0.67724	3.83269e-05	2.46416e-05
k__Bacteria; p__Proteobacteria; c__Gammaproteobacteria; o__Enterobacteriales; f__Enterobacteriaceae; g__; s__	0.462363	546.976	0.67695	1.12427e-05	1.81937e-05
k__Bacteria; p__Firmicutes; c__Clostridia; o__Clostridiales; f__Ruminococcaceae; g__; s__	0.46249	547.126	0.676299	2.49235e-05	1.52896e-05
k__Bacteria; p__Firmicutes; c__Clostridia; o__Clostridiales; f__Ruminococcaceae; g__; s__	0.462892	547.601	0.67605	1.2997e-05	2.23812e-05
k__Bacteria; p__Firmicutes; c__Clostridia; o__Clostridiales; f__Ruminococcaceae; g__Clostridium; s__	0.463875	548.764	0.676652	1.95995e-05	1.15233e-05
k__Bacteria; p__Firmicutes; c__Clostridia; o__Clostridiales; f__Lachnospiraceae; g__Coprococcus; s__	0.467183	552.677	0.680637	1.89805e-05	1.00564e-05
k__Bacteria; p__Bacteroidetes; c__Bacteroidia; o__Bacteroidales; f__Prevotellaceae; g__Prevotella; s__	0.467297	552.812	0.679965	3.15367e-05	5.34602e-05
k__Bacteria; p__Bacteroidetes; c__Bacteroidia; o__Bacteroidales; f__Bacteroidaceae; g__Bacteroides; s__	0.467784	553.388	0.679838	1.72668e-05	2.4227e-05
k__Bacteria; p__Firmicutes; c__Clostridia; o__Clostridiales; f__Lachnospiraceae; g__Coprococcus; s__	0.468909	554.72	0.680638	2.89614e-05	1.73029e-05
k__Bacteria; p__Fusobacteria; c__Fusobacteria; o__Fusobacteriales; f__Fusobacteriaceae; g__Fusobacterium; s__	0.471594	557.896	0.683696	6.1989e-05	2.43641e-05
k__Bacteria; p__Firmicutes; c__Clostridia; o__Clostridiales; f__Lachnospiraceae; g__; s__	0.472148	558.551	0.683661	0.000413934	0.000313933
k__Bacteria; p__Synergistetes; c__Synergistia; o__Synergistales; f__Synergistaceae; g__Synergistes; s__	0.475664	562.71	0.68791	4.17976e-05	6.79363e-05
k__Bacteria; p__Firmicutes; c__Clostridia; o__Clostridiales; f__Lachnospiraceae; g__Ruminococcus; s__Ruminococcustorques	0.476837	564.099	0.688765	1.55266e-05	9.03651e-06
k__Bacteria; p__Firmicutes; c__Clostridia; o__Clostridiales; f__Lachnospiraceae; g__; s__	0.476921	564.198	0.688046	4.2023e-05	6.02444e-05
k__Bacteria; p__Firmicutes; c__Clostridia; o__Clostridiales; f__Ruminococcaceae; g__Faecalibacterium; s__	0.477267	564.607	0.687706	3.31116e-05	1.94291e-05
k__Bacteria; p__Firmicutes; c__Clostridia; o__Clostridiales; f__; g__; s__	0.479484	567.229	0.69006	0.000128061	9.11777e-05
k__Bacteria; p__Firmicutes; c__Clostridia; o__Clostridiales; f__Ruminococcaceae; g__; s__	0.480452	568.375	0.690613	1.62679e-05	9.23769e-06
k__Bacteria; p__Bacteroidetes; c__Bacteroidia; o__Bacteroidales; f__Porphyromonadaceae; g__; s__	0.480861	568.859	0.690363	1.39845e-05	2.03308e-05
k__Bacteria; p__Bacteroidetes; c__Bacteroidia; o__Bacteroidales; f__Bacteroidaceae; g__Bacteroides; s__	0.48334	571.791	0.69308	2.27592e-05	3.47236e-05
k__Bacteria; p__Firmicutes; c__Clostridia; o__Clostridiales; f__Lachnospiraceae; g__Ruminococcus; s__	0.486012	574.953	0.696069	2.36854e-05	1.53514e-05
k__Bacteria; p__Tenericutes; c__Erysipelotrichi; o__Erysipelotrichales; f__Erysipelotrichaceae; g__Clostridium; s__Clostridiumspiroforme	0.486855	575.949	0.696432	1.10353e-05	1.76213e-05
k__Bacteria; p__Proteobacteria; c__Gammaproteobacteria; o__Enterobacteriales; f__Enterobacteriaceae; g__; s__	0.489698	579.313	0.699653	4.61e-05	6.84814e-05
k__Bacteria; p__Firmicutes; c__Clostridia; o__Clostridiales; f__Lachnospiraceae; g__Roseburia; s__Eubacteriumrectale	0.490434	580.184	0.69986	4.39982e-05	6.27947e-05
k__Bacteria; p__Firmicutes; c__Clostridia; o__Clostridiales; f__Ruminococcaceae; g__; s__	0.492552	582.689	0.702035	1.16814e-05	1.86417e-05
k__Bacteria; p__Proteobacteria; c__Gammaproteobacteria; o__Pasteurellales; f__Pasteurellaceae; g__; s__	0.493717	584.067	0.702848	1.92303e-05	1.049e-05
k__Bacteria; p__Bacteroidetes; c__Bacteroidia; o__Bacteroidales; f__Bacteroidaceae; g__Bacteroides; s__	0.496627	587.509	0.706141	1.62361e-05	2.36591e-05
k__Bacteria; p__Firmicutes; c__Clostridia; o__Clostridiales; f__Lachnospiraceae; g__; s__	0.498263	589.445	0.707617	1.44286e-05	9.28127e-06
k__Bacteria; p__Proteobacteria; c__Gammaproteobacteria; o__Pasteurellales; f__Pasteurellaceae; g__Haemophilus; s__	0.49993	591.418	0.709134	9.68635e-05	0.000158509
k__Bacteria; p__Firmicutes; c__Clostridia; o__Clostridiales; f__Ruminococcaceae; g__Ruminococcus; s__	0.50011	591.63	0.708539	2.63774e-05	1.79343e-05
k__Bacteria; p__Firmicutes; c__Clostridia; o__Clostridiales; f__Lachnospiraceae; g__; s__	0.500794	592.439	0.708659	0.00013099	0.000185533
k__Bacteria; p__Firmicutes; c__Clostridia; o__Clostridiales; f__Lachnospiraceae; g__; s__	0.502673	594.662	0.710468	3.07301e-05	4.13293e-05
k__Bacteria; p__Firmicutes; c__Clostridia; o__Clostridiales; f__Ruminococcaceae; g__Faecalibacterium; s__	0.503394	595.515	0.710638	2.64731e-05	3.71158e-05
k__Bacteria; p__Firmicutes; c__Clostridia; o__Clostridiales; f__Eubacteriaceae; g__Anaerofustis; s__Anaerofustisstercorihominis	0.504739	597.106	0.711688	1.66839e-05	2.43704e-05
k__Bacteria; p__Firmicutes; c__Clostridia; o__Clostridiales; f__Ruminococcaceae; g__Faecalibacterium; s__	0.504901	597.298	0.71107	3.00346e-05	1.8549e-05
k__Bacteria; p__Bacteroidetes; c__Bacteroidia; o__Bacteroidales; f__Bacteroidaceae; g__Bacteroides; s__	0.505618	598.146	0.711232	3.21956e-05	1.89608e-05
k__Bacteria; p__Proteobacteria; c__Gammaproteobacteria; o__Enterobacteriales; f__Enterobacteriaceae; g__Cronobacter; s__	0.506257	598.902	0.711285	3.1025e-05	4.59221e-05
k__Bacteria; p__Firmicutes; c__Clostridia; o__Clostridiales; f__Lachnospiraceae; g__Oribacterium; s__Oribacteriumsinus	0.506941	599.712	0.711402	2.13439e-05	3.01397e-05
k__Bacteria; p__Firmicutes; c__Clostridia; o__Clostridiales; f__Lachnospiraceae; g__; s__	0.508884	602.009	0.713281	2.80525e-05	1.93902e-05
k__Bacteria; p__Fusobacteria; c__Fusobacteria; o__Fusobacteriales; f__Fusobacteriaceae; g__Fusobacterium; s__	0.50947	602.703	0.713258	4.85369e-05	7.26337e-05
k__Bacteria; p__Firmicutes; c__Clostridia; o__Clostridiales; f__Lachnospiraceae; g__Dorea; s__Doreaformicigenerans	0.5098	603.093	0.712876	0.00010238	8.3514e-05
k__Bacteria; p__Firmicutes; c__Clostridia; o__Clostridiales; f__Veillonellaceae; g__Phascolarctobacterium; s__	0.511206	604.757	0.713999	2.62405e-05	3.82181e-05
k__Bacteria; p__Firmicutes; c__Clostridia; o__Clostridiales; f__Lachnospiraceae; g__; s__	0.513629	607.623	0.716536	0.000127419	0.000157398
k__Bacteria; p__Firmicutes; c__Clostridia; o__Clostridiales; f__Lachnospiraceae; g__Ruminococcus; s__Ruminococcusgnavus	0.515164	609.439	0.717832	2.8032e-05	1.97279e-05
k__Bacteria; p__Bacteroidetes; c__Bacteroidia; o__Bacteroidales; f__Bacteroidaceae; g__Bacteroides; s__	0.522743	618.404	0.727535	2.17326e-05	1.55567e-05
k__Bacteria; p__Bacteroidetes; c__Bacteroidia; o__Bacteroidales; f__Bacteroidaceae; g__Bacteroides; s__Bacteroidescaccae	0.5259	622.14	0.731069	7.20122e-05	5.77756e-05
k__Bacteria; p__Verrucomicrobia; c__Verrucomicrobiae; o__Verrucomicrobiales; f__Verrucomicrobiaceae; g__Akkermansia; s__Akkermansiamuciniphila	0.526028	622.291	0.730389	1.70182e-05	1.00888e-05
k__Bacteria; p__Firmicutes; c__Clostridia; o__Clostridiales; f__Lachnospiraceae; g__Eubacterium; s__	0.528486	625.198	0.732941	1.98624e-05	1.3056e-05
k__Bacteria; p__Firmicutes; c__Clostridia; o__Clostridiales; f__Lachnospiraceae; g__; s__	0.531439	628.692	0.736174	6.72497e-05	9.00229e-05
k__Bacteria; p__Firmicutes; c__Clostridia; o__Clostridiales; f__; g__; s__	0.531946	629.292	0.736014	0.000147048	0.000217586
k__Bacteria; p__Bacteroidetes; c__Bacteroidia; o__Bacteroidales; f__Bacteroidaceae; g__Bacteroides; s__Bacteroidesfragilis	0.532401	629.83	0.735783	0.00209343	0.0014094
k__Bacteria; p__Proteobacteria; c__Gammaproteobacteria; o__Pasteurellales; f__Pasteurellaceae; g__Aggregatibacter; s__Aggregatibactersegnis	0.532602	630.068	0.735202	2.51963e-05	3.81505e-05
k__Bacteria; p__Firmicutes; c__Bacilli; o__Bacillales; f__Staphylococcaceae; g__Staphylococcus; s__	0.53294	630.469	0.734812	2.36189e-05	4.11476e-05
k__Bacteria; p__Firmicutes; c__Clostridia; o__Clostridiales; f__Lachnospiraceae; g__Blautia; s__	0.533875	631.574	0.735243	4.57596e-05	3.39636e-05
k__Bacteria; p__Tenericutes; c__Erysipelotrichi; o__Erysipelotrichales; f__Erysipelotrichaceae; g__Holdemania; s__	0.535993	634.079	0.737301	9.50714e-05	6.40617e-05
k__Bacteria; p__Firmicutes; c__Clostridia; o__Clostridiales; f__Lachnospiraceae; g__; s__	0.536255	634.39	0.736806	2.78976e-05	1.78358e-05
k__Bacteria; p__Firmicutes; c__Clostridia; o__Clostridiales; f__Lachnospiraceae; g__; s__	0.536258	634.393	0.735955	2.01757e-05	1.37432e-05
k__Bacteria; p__Firmicutes; c__Clostridia; o__Clostridiales; f__Lachnospiraceae; g__Lachnospira; s__	0.536483	634.66	0.735411	3.59326e-05	2.54354e-05
k__Bacteria; p__Bacteroidetes; c__Bacteroidia; o__Bacteroidales; f__Bacteroidaceae; g__Bacteroides; s__	0.53668	634.892	0.734829	2.16702e-05	1.47936e-05
k__Bacteria; p__Firmicutes; c__Clostridia; o__Clostridiales; f__Ruminococcaceae; g__Oscillospira; s__	0.537103	635.393	0.734559	3.08572e-05	4.55547e-05
k__Bacteria; p__Bacteroidetes; c__Bacteroidia; o__Bacteroidales; f__Bacteroidaceae; g__Bacteroides; s__Bacteroidesfragilis	0.537203	635.511	0.733846	1.56303e-05	2.19072e-05
k__Bacteria; p__Firmicutes; c__Clostridia; o__Clostridiales; f__Lachnospiraceae; g__Clostridium; s__	0.539615	638.364	0.736291	6.41262e-05	8.72551e-05
k__Bacteria; p__Firmicutes; c__Clostridia; o__Clostridiales; f__Ruminococcaceae; g__Eubacterium; s__	0.539859	638.653	0.735775	4.40101e-05	2.60243e-05
k__Bacteria; p__Firmicutes; c__Clostridia; o__Clostridiales; f__Lachnospiraceae; g__Ruminococcus; s__Ruminococcusgnavus	0.540523	639.438	0.735833	2.53146e-05	1.75325e-05
k__Bacteria; p__Actinobacteria; c__Actinobacteria; o__Actinomycetales; f__Micrococcaceae; g__Rothia; s__	0.542019	641.208	0.737021	7.82648e-05	0.000111741
k__Bacteria; p__Firmicutes; c__Clostridia; o__Clostridiales; f__Lachnospiraceae; g__; s__	0.542558	641.846	0.736907	1.33344e-05	2.02111e-05
k__Bacteria; p__Firmicutes; c__Clostridia; o__Clostridiales; f__Lachnospiraceae; g__; s__	0.544339	643.953	0.738478	1.16638e-05	1.72039e-05
k__Bacteria; p__Tenericutes; c__Erysipelotrichi; o__Erysipelotrichales; f__Erysipelotrichaceae; g__; s__	0.545152	644.915	0.738735	2.35304e-05	1.38755e-05
k__Bacteria; p__Tenericutes; c__Erysipelotrichi; o__Erysipelotrichales; f__Erysipelotrichaceae; g__; s__Eubacteriumbiforme	0.545577	645.417	0.738464	0.00192515	0.00293194
k__Bacteria; p__Firmicutes; c__Clostridia; o__Clostridiales; f__Lachnospiraceae; g__Roseburia; s__Eubacteriumrectale	0.55197	652.981	0.746264	8.50866e-06	1.25216e-05
k__Bacteria; p__Bacteroidetes; c__Bacteroidia; o__Bacteroidales; f__Bacteroidaceae; g__Bacteroides; s__	0.552061	653.088	0.745534	0.000113412	0.00013159
k__Bacteria; p__Firmicutes; c__Clostridia; o__Clostridiales; f__Lachnospiraceae; g__; s__	0.5527	653.844	0.745547	7.24364e-05	9.24574e-05
k__Bacteria; p__Bacteroidetes; c__Bacteroidia; o__Bacteroidales; f__Bacteroidaceae; g__Bacteroides; s__Bacteroidesfragilis	0.555472	657.124	0.748433	2.80077e-05	1.82732e-05
k__Bacteria; p__Firmicutes; c__Clostridia; o__Clostridiales; f__Lachnospiraceae; g__Ruminococcus; s__	0.555514	657.173	0.747637	3.17248e-05	2.19223e-05
k__Bacteria; p__Firmicutes; c__Clostridia; o__Clostridiales; f__Lachnospiraceae; g__; s__	0.557653	659.704	0.749663	2.10239e-05	2.81868e-05
k__Bacteria; p__Actinobacteria; c__Actinobacteria; o__Coriobacteriales; f__Coriobacteriaceae; g__Adlercreutzia; s__	0.557981	660.092	0.749253	0.000159201	8.59724e-05
k__Bacteria; p__Bacteroidetes; c__Bacteroidia; o__Bacteroidales; f__Bacteroidaceae; g__Bacteroides; s__	0.559865	662.32	0.750929	1.90663e-05	1.34238e-05
k__Bacteria; p__Firmicutes; c__Clostridia; o__Clostridiales; f__Ruminococcaceae; g__Oscillospira; s__	0.562512	665.452	0.753626	1.53561e-05	9.79088e-06
k__Bacteria; p__Bacteroidetes; c__Bacteroidia; o__Bacteroidales; f__Porphyromonadaceae; g__Parabacteroides; s__	0.567062	670.834	0.758862	0.000203982	0.000247593
k__Bacteria; p__Fusobacteria; c__Fusobacteria; o__Fusobacteriales; f__Fusobacteriaceae; g__Fusobacterium; s__	0.568034	671.984	0.759304	0.00151475	0.00115672
k__Bacteria; p__Firmicutes; c__Clostridia; o__Clostridiales; f__Lachnospiraceae; g__; s__	0.568201	672.182	0.75867	0.0001897	0.00015264
k__Bacteria; p__Firmicutes; c__Clostridia; o__Clostridiales; f__Ruminococcaceae; g__Faecalibacterium; s__	0.568359	672.369	0.758026	9.80314e-06	1.42533e-05
k__Bacteria; p__Firmicutes; c__Bacilli; o__Lactobacillales; f__Streptococcaceae; g__Streptococcus; s__	0.570182	674.525	0.759601	0.000522654	0.000354719
k__Bacteria; p__Firmicutes; c__Clostridia; o__Clostridiales; f__Ruminococcaceae; g__; s__	0.570343	674.716	0.758961	1.7295e-05	1.12608e-05
k__Bacteria; p__Bacteroidetes; c__Bacteroidia; o__Bacteroidales; f__; g__; s__	0.571595	676.197	0.759772	0.00104162	0.000546719
k__Bacteria; p__Bacteroidetes; c__Bacteroidia; o__Bacteroidales; f__Bacteroidaceae; g__Bacteroides; s__	0.571735	676.363	0.759106	1.62319e-05	1.09449e-05
k__Bacteria; p__Bacteroidetes; c__Bacteroidia; o__Bacteroidales; f__; g__; s__	0.573212	678.109	0.760212	9.399e-06	1.37642e-05
k__Bacteria; p__Bacteroidetes; c__Bacteroidia; o__Bacteroidales; f__Bacteroidaceae; g__Bacteroides; s__	0.57398	679.019	0.760379	2.63866e-05	1.93073e-05
k__Bacteria; p__Firmicutes; c__Clostridia; o__Clostridiales; f__Lachnospiraceae; g__; s__	0.574295	679.391	0.759945	3.27122e-05	2.44075e-05
k__Bacteria; p__Firmicutes; c__Clostridia; o__Clostridiales; f__Veillonellaceae; g__Veillonella; s__	0.576271	681.729	0.761708	1.40817e-05	2.10006e-05
k__Bacteria; p__Tenericutes; c__Erysipelotrichi; o__Erysipelotrichales; f__Erysipelotrichaceae; g__Holdemania; s__Holdemaniafiliformis	0.577474	683.152	0.762446	0.000282244	0.00035595
k__Bacteria; p__Firmicutes; c__Clostridia; o__Clostridiales; f__Lachnospiraceae; g__; s__	0.577668	683.382	0.761853	0.000439342	0.000329956
k__Bacteria; p__Firmicutes; c__Clostridia; o__Clostridiales; f__Ruminococcaceae; g__Faecalibacterium; s__	0.578229	684.045	0.761743	0.000135302	0.000112623
k__Bacteria; p__Firmicutes; c__Clostridia; o__Clostridiales; f__Lachnospiraceae; g__; s__	0.579596	685.662	0.762695	0.000116581	9.64004e-05
k__Bacteria; p__Verrucomicrobia; c__Verrucomicrobiae; o__Verrucomicrobiales; f__Verrucomicrobiaceae; g__Akkermansia; s__Akkermansiamuciniphila	0.58051	686.743	0.763048	0.00108905	0.000752499
k__Bacteria; p__Firmicutes; c__Clostridia; o__Clostridiales; f__Veillonellaceae; g__Phascolarctobacterium; s__	0.5816	688.033	0.763633	1.06818e-05	7.03933e-06
k__Bacteria; p__Bacteroidetes; c__Bacteroidia; o__Bacteroidales; f__Bacteroidaceae; g__Bacteroides; s__Bacteroidesfragilis	0.583136	689.85	0.7648	2.11533e-05	1.4649e-05
k__Bacteria; p__Firmicutes; c__Clostridia; o__Clostridiales; f__Lachnospiraceae; g__Ruminococcus; s__	0.583784	690.617	0.764803	1.47472e-05	2.13762e-05
k__Bacteria; p__Proteobacteria; c__Betaproteobacteria; o__Burkholderiales; f__Alcaligenaceae; g__Sutterella; s__	0.585173	692.259	0.765773	0.00146289	0.00200555
k__Bacteria; p__Firmicutes; c__Clostridia; o__Clostridiales; f__Lachnospiraceae; g__; s__	0.58696	694.373	0.767264	1.90708e-05	2.63331e-05
k__Bacteria; p__Firmicutes; c__Clostridia; o__Clostridiales; f__Ruminococcaceae; g__; s__	0.587737	695.292	0.767431	8.41348e-05	6.82775e-05
k__Bacteria; p__Bacteroidetes; c__Bacteroidia; o__Bacteroidales; f__Prevotellaceae; g__Prevotella; s__	0.587919	695.508	0.766822	0.000448964	0.000678955
k__Bacteria; p__Bacteroidetes; c__Bacteroidia; o__Bacteroidales; f__Bacteroidaceae; g__Bacteroides; s__	0.588522	696.222	0.766764	3.34146e-05	4.30946e-05
k__Bacteria; p__Firmicutes; c__Clostridia; o__Clostridiales; f__Lachnospiraceae; g__; s__	0.590606	698.687	0.768632	1.54886e-05	1.04554e-05
k__Bacteria; p__Proteobacteria; c__Deltaproteobacteria; o__Desulfovibrionales; f__Desulfovibrionaceae; g__Bilophila; s__Bilophilawadsworthia	0.591999	700.335	0.769599	1.5134e-05	1.03897e-05
k__Bacteria; p__Bacteroidetes; c__Bacteroidia; o__Bacteroidales; f__Rikenellaceae; g__Alistipes; s__	0.593446	702.046	0.770633	0.00016887	0.000204115
k__Bacteria; p__Firmicutes; c__Clostridia; o__Clostridiales; f__Lachnospiraceae; g__Roseburia; s__Eubacteriumrectale	0.594639	703.458	0.771335	0.00299418	0.00228553
k__Bacteria; p__Firmicutes; c__Clostridia; o__Clostridiales; f__Lachnospiraceae; g__Roseburia; s__	0.595263	704.197	0.7713	0.000135695	0.000162078
k__Bacteria; p__Firmicutes; c__Clostridia; o__Clostridiales; f__Lachnospiraceae; g__Blautia; s__	0.595678	704.687	0.770992	1.07277e-05	1.53941e-05
k__Bacteria; p__Firmicutes; c__Clostridia; o__Clostridiales; f__Lachnospiraceae; g__; s__	0.595794	704.824	0.770299	2.90247e-05	2.15675e-05
k__Bacteria; p__Bacteroidetes; c__Bacteroidia; o__Bacteroidales; f__Bacteroidaceae; g__Bacteroides; s__	0.596071	705.152	0.769817	1.34211e-05	1.88879e-05
k__Bacteria; p__Actinobacteria; c__Actinobacteria; o__Coriobacteriales; f__Coriobacteriaceae; g__Eggerthella; s__Eggerthellalenta	0.59628	705.399	0.769246	0.00014393	0.000176702
k__Bacteria; p__Bacteroidetes; c__Bacteroidia; o__Bacteroidales; f__Bacteroidaceae; g__Bacteroides; s__	0.596953	706.195	0.769276	1.33816e-05	1.87247e-05
k__Bacteria; p__Bacteroidetes; c__Bacteroidia; o__Bacteroidales; f__Bacteroidaceae; g__Bacteroides; s__Bacteroidesfragilis	0.598856	708.446	0.770888	1.36588e-05	9.1959e-06
k__Bacteria; p__Bacteroidetes; c__Bacteroidia; o__Bacteroidales; f__Prevotellaceae; g__; s__	0.598913	708.514	0.770124	0.000373323	0.000167936
k__Bacteria; p__Firmicutes; c__Clostridia; o__Clostridiales; f__Lachnospiraceae; g__Ruminococcus; s__Ruminococcusgnavus	0.599121	708.76	0.769555	0.000152659	0.000119909
k__Bacteria; p__Firmicutes; c__Clostridia; o__Clostridiales; f__Lachnospiraceae; g__Butyrivibrio; s__	0.599857	709.631	0.769665	1.52412e-05	2.13167e-05
k__Bacteria; p__Firmicutes; c__Clostridia; o__Clostridiales; f__Lachnospiraceae; g__Roseburia; s__Eubacteriumrectale	0.601215	711.238	0.770572	0.0028177	0.00214747
k__Bacteria; p__Firmicutes; c__Clostridia; o__Clostridiales; f__Ruminococcaceae; g__Faecalibacterium; s__	0.602685	712.977	0.77162	1.64027e-05	2.20373e-05
k__Bacteria; p__Firmicutes; c__Clostridia; o__Clostridiales; f__Lachnospiraceae; g__Coprococcus; s__	0.604105	714.657	0.772602	0.000233676	0.000193193
k__Bacteria; p__Firmicutes; c__Clostridia; o__Clostridiales; f__Ruminococcaceae; g__Faecalibacterium; s__	0.605342	716.12	0.773347	1.61063e-05	2.31585e-05
k__Bacteria; p__Firmicutes; c__Clostridia; o__Clostridiales; f__Lachnospiraceae; g__Eubacterium; s__	0.605798	716.66	0.773096	1.81984e-05	1.32765e-05
k__Bacteria; p__Firmicutes; c__Clostridia; o__Clostridiales; f__Catabacteriaceae; g__; s__	0.606195	717.128	0.772768	0.000165076	0.000116396
k__Bacteria; p__Tenericutes; c__Erysipelotrichi; o__Erysipelotrichales; f__Erysipelotrichaceae; g__; s__Eubacteriumbiforme	0.61206	724.067	0.779405	0.000213085	0.000307228
k__Bacteria; p__Bacteroidetes; c__Bacteroidia; o__Bacteroidales; f__Porphyromonadaceae; g__Parabacteroides; s__Parabacteroidesjohnsonii	0.612372	724.436	0.778963	2.42779e-05	3.17838e-05
k__Bacteria; p__Firmicutes; c__Clostridia; o__Clostridiales; f__Ruminococcaceae; g__Faecalibacterium; s__	0.612697	724.82	0.77854	2.08537e-05	2.82648e-05
k__Bacteria; p__Firmicutes; c__Clostridia; o__Clostridiales; f__; g__; s__	0.61425	726.658	0.779676	2.46261e-05	3.15072e-05
k__Bacteria; p__Firmicutes; c__Clostridia; o__Clostridiales; f__Ruminococcaceae; g__; s__	0.614301	726.718	0.778905	2.97899e-05	3.9767e-05
k__Bacteria; p__Firmicutes; c__Clostridia; o__Clostridiales; f__Lachnospiraceae; g__Ruminococcus; s__Ruminococcusgnavus	0.616107	728.855	0.780359	0.0181297	0.0151296
k__Bacteria; p__Firmicutes; c__Clostridia; o__Clostridiales; f__Ruminococcaceae; g__Faecalibacterium; s__	0.618348	731.505	0.782358	2.03353e-05	2.62846e-05
k__Bacteria; p__Firmicutes; c__Clostridia; o__Clostridiales; f__Lachnospiraceae; g__; s__	0.618402	731.57	0.781592	3.96417e-05	5.02147e-05
k__Bacteria; p__Firmicutes; c__Clostridia; o__Clostridiales; f__Ruminococcaceae; g__; s__	0.62144	735.164	0.784593	1.93721e-05	2.69551e-05
k__Bacteria; p__Firmicutes; c__Clostridia; o__Clostridiales; f__Lachnospiraceae; g__Coprococcus; s__	0.621703	735.475	0.784088	0.00360257	0.00271261
k__Bacteria; p__Tenericutes; c__Erysipelotrichi; o__Erysipelotrichales; f__Erysipelotrichaceae; g__Clostridium; s__	0.624685	739.003	0.78701	2.90853e-05	1.97574e-05
k__Bacteria; p__Firmicutes; c__Clostridia; o__Clostridiales; f__Lachnospiraceae; g__Clostridium; s__	0.6251	739.494	0.786696	0.000352443	0.000214045
k__Bacteria; p__Bacteroidetes; c__Bacteroidia; o__Bacteroidales; f__Bacteroidaceae; g__Bacteroides; s__	0.625958	740.509	0.786938	4.25237e-05	3.4615e-05
k__Bacteria; p__Firmicutes; c__Clostridia; o__Clostridiales; f__Ruminococcaceae; g__; s__	0.628239	743.206	0.788966	0.000130143	9.04811e-05
k__Bacteria; p__Firmicutes; c__Clostridia; o__Clostridiales; f__Lachnospiraceae; g__Clostridium; s__	0.629145	744.279	0.789267	2.05181e-05	1.45068e-05
k__Bacteria; p__Bacteroidetes; c__Bacteroidia; o__Bacteroidales; f__Bacteroidaceae; g__Bacteroides; s__	0.630247	745.582	0.789812	2.3403e-05	2.98038e-05
k__Bacteria; p__Bacteroidetes; c__Bacteroidia; o__Bacteroidales; f__; g__; s__	0.630885	746.337	0.789775	4.78917e-05	5.77915e-05
k__Bacteria; p__Proteobacteria; c__Betaproteobacteria; o__Neisseriales; f__Neisseriaceae; g__Neisseria; s__	0.633045	748.893	0.791641	0.000132374	9.72658e-05
k__Bacteria; p__Proteobacteria; c__Gammaproteobacteria; o__Enterobacteriales; f__Enterobacteriaceae; g__Erwinia; s__Erwiniatoletana	0.63368	749.644	0.791598	7.15724e-05	5.7619e-05
k__Bacteria; p__Firmicutes; c__Clostridia; o__Clostridiales; f__Lachnospiraceae; g__Roseburia; s__Eubacteriumrectale	0.634267	750.338	0.791496	2.81503e-05	3.82303e-05
k__Bacteria; p__Firmicutes; c__Clostridia; o__Clostridiales; f__Veillonellaceae; g__Dialister; s__	0.634898	751.085	0.791449	0.000355749	0.000207719
k__Bacteria; p__Firmicutes; c__Clostridia; o__Clostridiales; f__; g__; s__	0.635196	751.436	0.790986	3.50198e-05	2.54485e-05
k__Bacteria; p__Firmicutes; c__Clostridia; o__Clostridiales; f__Lachnospiraceae; g__Ruminococcus; s__Ruminococcusgnavus	0.639601	756.648	0.795634	4.31086e-05	3.45915e-05
k__Bacteria; p__Firmicutes; c__Clostridia; o__Clostridiales; f__Lachnospiraceae; g__Dorea; s__Doreaformicigenerans	0.64197	759.45	0.797742	3.44257e-05	4.27713e-05
k__Bacteria; p__Tenericutes; c__Erysipelotrichi; o__Erysipelotrichales; f__Erysipelotrichaceae; g__; s__	0.644803	762.802	0.800422	2.29868e-05	3.1826e-05
k__Bacteria; p__Firmicutes; c__Clostridia; o__Clostridiales; f__; g__; s__	0.645564	763.702	0.800527	0.000205287	0.000131693
k__Bacteria; p__Firmicutes; c__Clostridia; o__Clostridiales; f__Ruminococcaceae; g__; s__	0.64651	764.822	0.800861	2.02524e-05	2.62861e-05
k__Bacteria; p__Bacteroidetes; c__Bacteroidia; o__Bacteroidales; f__Bacteroidaceae; g__Bacteroides; s__	0.648326	766.97	0.80227	2.20587e-05	1.74837e-05
k__Bacteria; p__Firmicutes; c__Clostridia; o__Clostridiales; f__Lachnospiraceae; g__Clostridium; s__	0.649938	768.877	0.803424	1.45324e-05	1.88997e-05
k__Bacteria; p__Firmicutes; c__Clostridia; o__Clostridiales; f__Lachnospiraceae; g__Clostridium; s__Clostridiumbolteae	0.65013	769.104	0.802822	1.11735e-05	1.50695e-05
k__Bacteria; p__Verrucomicrobia; c__Verrucomicrobiae; o__Verrucomicrobiales; f__Verrucomicrobiaceae; g__Akkermansia; s__Akkermansiamuciniphila	0.655735	775.735	0.8089	1.48287e-05	1.05921e-05
k__Bacteria; p__Firmicutes; c__Clostridia; o__Clostridiales; f__Ruminococcaceae; g__; s__	0.657175	777.438	0.809831	8.13991e-05	0.000103785
k__Bacteria; p__Firmicutes; c__Clostridia; o__Clostridiales; f__Lachnospiraceae; g__; s__	0.658023	778.441	0.810032	1.8133e-05	1.32247e-05
k__Bacteria; p__Firmicutes; c__Clostridia; o__Clostridiales; f__Lachnospiraceae; g__; s__	0.658498	779.003	0.809775	1.74401e-05	1.2954e-05
k__Bacteria; p__Firmicutes; c__Clostridia; o__Clostridiales; f__Lachnospiraceae; g__; s__	0.661212	782.213	0.812267	0.00381766	0.00333809
k__Bacteria; p__Firmicutes; c__Clostridia; o__Clostridiales; f__Ruminococcaceae; g__; s__	0.662164	783.341	0.812594	1.23753e-05	1.66752e-05
k__Bacteria; p__Bacteroidetes; c__Bacteroidia; o__Bacteroidales; f__Bacteroidaceae; g__Bacteroides; s__Bacteroidesfragilis	0.663999	785.511	0.814001	2.5113e-05	1.92525e-05
k__Bacteria; p__Bacteroidetes; c__Bacteroidia; o__Bacteroidales; f__Bacteroidaceae; g__Bacteroides; s__	0.665937	787.803	0.815531	1.49209e-05	1.08491e-05
k__Bacteria; p__Tenericutes; c__Erysipelotrichi; o__Erysipelotrichales; f__Erysipelotrichaceae; g__Clostridium; s__Clostridiumspiroforme	0.666546	788.524	0.815433	0.000354879	0.000292608
k__Bacteria; p__Bacteroidetes; c__Bacteroidia; o__Bacteroidales; f__; g__; s__	0.668957	791.376	0.817537	0.000192201	0.000122375
k__Bacteria; p__Firmicutes; c__Clostridia; o__Clostridiales; f__Ruminococcaceae; g__Faecalibacterium; s__	0.671099	793.91	0.819309	2.50098e-05	2.03057e-05
k__Bacteria; p__Firmicutes; c__Clostridia; o__Clostridiales; f__Lachnospiraceae; g__Clostridium; s__	0.676663	800.492	0.82525	0.000244096	0.000371014
k__Bacteria; p__Firmicutes; c__Clostridia; o__Clostridiales; f__Lachnospiraceae; g__; s__	0.678918	803.16	0.827147	0.000115844	0.000141705
k__Bacteria; p__Firmicutes; c__Clostridia; o__Clostridiales; f__Ruminococcaceae; g__Faecalibacterium; s__	0.679322	803.638	0.826788	5.69534e-05	4.88535e-05
k__Bacteria; p__Firmicutes; c__Clostridia; o__Clostridiales; f__Ruminococcaceae; g__Faecalibacterium; s__	0.67945	803.79	0.826094	0.000214179	0.000191519
k__Bacteria; p__Firmicutes; c__Clostridia; o__Clostridiales; f__Lachnospiraceae; g__Clostridium; s__	0.680688	805.254	0.82675	2.09345e-05	1.62365e-05
k__Bacteria; p__Bacteroidetes; c__Bacteroidia; o__Bacteroidales; f__; g__; s__	0.683736	808.86	0.8296	0.000220361	0.000149724
k__Bacteria; p__Firmicutes; c__Clostridia; o__Clostridiales; f__Lachnospiraceae; g__; s__	0.684263	809.484	0.829389	0.000485089	0.00040596
k__Bacteria; p__Bacteroidetes; c__Bacteroidia; o__Bacteroidales; f__Bacteroidaceae; g__Bacteroides; s__	0.685097	810.47	0.82955	2.00278e-05	2.54252e-05
k__Bacteria; p__Actinobacteria; c__Actinobacteria; o__Coriobacteriales; f__Coriobacteriaceae; g__Collinsella; s__Collinsellaaerofaciens	0.687176	812.93	0.831216	1.39412e-05	1.07068e-05
k__Bacteria; p__Firmicutes; c__Clostridia; o__Clostridiales; f__Ruminococcaceae; g__; s__	0.690343	816.676	0.834194	6.27861e-05	4.75664e-05
k__Bacteria; p__Bacteroidetes; c__Bacteroidia; o__Bacteroidales; f__Bacteroidaceae; g__Bacteroides; s__	0.690354	816.689	0.833356	8.53715e-05	7.57291e-05
k__Bacteria; p__Firmicutes; c__Clostridia; o__Clostridiales; f__Clostridiaceae; g__Clostridium; s__	0.691151	817.632	0.833467	1.9631e-05	1.45705e-05
k__Bacteria; p__Proteobacteria; c__Gammaproteobacteria; o__Enterobacteriales; f__Enterobacteriaceae; g__Erwinia; s__	0.692944	819.753	0.834779	8.15122e-05	5.38428e-05
k__Bacteria; p__Firmicutes; c__Clostridia; o__Clostridiales; f__Ruminococcaceae; g__Faecalibacterium; s__	0.693254	820.119	0.834303	1.2669e-05	1.62676e-05
k__Bacteria; p__Firmicutes; c__Clostridia; o__Clostridiales; f__Ruminococcaceae; g__Faecalibacterium; s__Faecalibacteriumprausnitzii	0.695565	822.853	0.836233	1.544e-05	1.93051e-05
k__Bacteria; p__Firmicutes; c__Clostridia; o__Clostridiales; f__Lachnospiraceae; g__; s__	0.69699	824.539	0.837096	7.56215e-05	6.11883e-05
k__Bacteria; p__Bacteroidetes; c__Bacteroidia; o__Bacteroidales; f__Bacteroidaceae; g__Bacteroides; s__Bacteroidesfragilis	0.697185	824.77	0.83648	1.60241e-05	1.1597e-05
k__Bacteria; p__Firmicutes; c__Clostridia; o__Clostridiales; f__Lachnospiraceae; g__Coprococcus; s__	0.697635	825.302	0.836172	2.11122e-05	1.67353e-05
k__Bacteria; p__Bacteroidetes; c__Bacteroidia; o__Bacteroidales; f__Rikenellaceae; g__Alistipes; s__	0.700357	828.522	0.838585	0.000116446	0.000138764
k__Bacteria; p__Bacteroidetes; c__Bacteroidia; o__Bacteroidales; f__Porphyromonadaceae; g__Parabacteroides; s__	0.701638	830.037	0.839269	0.00773586	0.00870575
k__Bacteria; p__Firmicutes; c__Clostridia; o__Clostridiales; f__Lachnospiraceae; g__; s__	0.702009	830.476	0.838865	3.44562e-05	2.86408e-05
k__Bacteria; p__Proteobacteria; c__Betaproteobacteria; o__Burkholderiales; f__Alcaligenaceae; g__; s__	0.703205	831.892	0.839447	0.00171754	0.00204947
k__Bacteria; p__Firmicutes; c__Clostridia; o__Clostridiales; f__Veillonellaceae; g__Veillonella; s__	0.703796	832.591	0.839305	2.09079e-05	2.84595e-05
k__Bacteria; p__Bacteroidetes; c__Bacteroidia; o__Bacteroidales; f__Bacteroidaceae; g__Bacteroides; s__	0.704829	833.813	0.839691	0.000230562	0.000211932
k__Bacteria; p__Firmicutes; c__Clostridia; o__Clostridiales; f__Lachnospiraceae; g__; s__	0.705059	834.085	0.83912	2.94344e-05	2.20031e-05
k__Bacteria; p__Firmicutes; c__Clostridia; o__Clostridiales; f__Lachnospiraceae; g__; s__	0.705215	834.27	0.838462	1.6723e-05	2.03649e-05
k__Bacteria; p__Firmicutes; c__Clostridia; o__Clostridiales; f__Lachnospiraceae; g__Clostridium; s__	0.708298	837.916	0.841281	0.000786479	0.000675036
k__Bacteria; p__Tenericutes; c__Erysipelotrichi; o__Erysipelotrichales; f__Erysipelotrichaceae; g__Clostridium; s__	0.70855	838.215	0.840737	0.000701744	0.000586274
k__Bacteria; p__Firmicutes; c__Clostridia; o__Clostridiales; f__Lachnospiraceae; g__; s__	0.709589	839.444	0.841126	0.000165954	0.000194083
k__Bacteria; p__Bacteroidetes; c__Bacteroidia; o__Bacteroidales; f__Rikenellaceae; g__; s__	0.713911	844.557	0.845402	6.24762e-05	7.47273e-05
k__Bacteria; p__Bacteroidetes; c__Bacteroidia; o__Bacteroidales; f__Bacteroidaceae; g__Bacteroides; s__	0.715718	846.695	0.846695	2.16986e-05	1.5741e-05
k__Bacteria; p__Bacteroidetes; c__Bacteroidia; o__Bacteroidales; f__Bacteroidaceae; g__Bacteroides; s__	0.720382	852.212	0.851361	0.0168043	0.0191406
k__Bacteria; p__Bacteroidetes; c__Bacteroidia; o__Bacteroidales; f__Bacteroidaceae; g__Bacteroides; s__	0.721246	853.235	0.851532	4.70292e-05	4.04762e-05
k__Bacteria; p__Bacteroidetes; c__Bacteroidia; o__Bacteroidales; f__Bacteroidaceae; g__Bacteroides; s__Bacteroidesuniformis	0.722144	854.297	0.851741	3.49895e-05	4.11549e-05
k__Bacteria; p__Proteobacteria; c__Betaproteobacteria; o__Burkholderiales; f__Alcaligenaceae; g__; s__	0.724459	857.035	0.853621	2.61527e-05	2.02616e-05
k__Bacteria; p__Bacteroidetes; c__Bacteroidia; o__Bacteroidales; f__Bacteroidaceae; g__Bacteroides; s__	0.72595	858.798	0.854526	2.26231e-05	2.67074e-05
k__Bacteria; p__Bacteroidetes; c__Bacteroidia; o__Bacteroidales; f__Bacteroidaceae; g__Bacteroides; s__Bacteroidesfragilis	0.72668	859.662	0.854535	3.22428e-05	3.74169e-05
k__Bacteria; p__Firmicutes; c__Clostridia; o__Clostridiales; f__; g__; s__	0.726855	859.87	0.853893	1.14346e-05	1.45781e-05
k__Bacteria; p__Verrucomicrobia; c__Verrucomicrobiae; o__Verrucomicrobiales; f__Verrucomicrobiaceae; g__Akkermansia; s__Akkermansiamuciniphila	0.727787	860.971	0.854138	1.85218e-05	2.33075e-05
k__Bacteria; p__Firmicutes; c__Clostridia; o__Clostridiales; f__Lachnospiraceae; g__Blautia; s__	0.727913	861.121	0.85344	2.96742e-05	2.42208e-05
k__Bacteria; p__Fusobacteria; c__Fusobacteria; o__Fusobacteriales; f__Fusobacteriaceae; g__Fusobacterium; s__	0.728883	862.269	0.853731	4.57028e-05	3.34115e-05
k__Bacteria; p__Firmicutes; c__Clostridia; o__Clostridiales; f__Ruminococcaceae; g__; s__	0.73055	864.24	0.854837	0.000147153	0.000131685
k__Bacteria; p__Bacteroidetes; c__Bacteroidia; o__Bacteroidales; f__Bacteroidaceae; g__Bacteroides; s__	0.731379	865.222	0.854962	3.27559e-05	2.77945e-05
k__Bacteria; p__Bacteroidetes; c__Bacteroidia; o__Bacteroidales; f__Porphyromonadaceae; g__Parabacteroides; s__	0.734249	868.616	0.857469	2.02728e-05	1.68205e-05
k__Bacteria; p__Bacteroidetes; c__Bacteroidia; o__Bacteroidales; f__Porphyromonadaceae; g__Odoribacter; s__	0.735779	870.427	0.858409	1.91431e-05	1.57352e-05
k__Bacteria; p__Firmicutes; c__Clostridia; o__Clostridiales; f__Lachnospiraceae; g__Ruminococcus; s__	0.736625	871.427	0.858549	4.69939e-05	5.63019e-05
k__Bacteria; p__Firmicutes; c__Clostridia; o__Clostridiales; f__Ruminococcaceae; g__Faecalibacterium; s__	0.736718	871.537	0.857812	0.00116946	0.000974273
k__Bacteria; p__Firmicutes; c__Clostridia; o__Clostridiales; f__Lachnospiraceae; g__Ruminococcus; s__Ruminococcusgnavus	0.74018	875.633	0.860996	1.34602e-05	1.08819e-05
k__Bacteria; p__Bacteroidetes; c__Bacteroidia; o__Bacteroidales; f__Bacteroidaceae; g__Bacteroides; s__	0.740346	875.829	0.860343	1.86163e-05	1.48062e-05
k__Bacteria; p__Firmicutes; c__Clostridia; o__Clostridiales; f__Lachnospiraceae; g__Clostridium; s__	0.743248	879.262	0.862868	1.58373e-05	1.2667e-05
k__Bacteria; p__Firmicutes; c__Clostridia; o__Clostridiales; f__Lachnospiraceae; g__Clostridium; s__	0.74332	879.348	0.862106	0.00597619	0.00521487
No blast hit	0.747955	884.831	0.866631	1.60922e-05	1.91454e-05
k__Bacteria; p__Firmicutes; c__Clostridia; o__Clostridiales; f__Lachnospiraceae; g__; s__	0.748335	885.28	0.866223	1.75306e-05	2.25282e-05
k__Bacteria; p__Firmicutes; c__Clostridia; o__Clostridiales; f__Lachnospiraceae; g__Clostridium; s__	0.748848	885.888	0.86597	2.28909e-05	1.8663e-05
k__Bacteria; p__Firmicutes; c__Clostridia; o__Clostridiales; f__Lachnospiraceae; g__Ruminococcus; s__Ruminococcusgnavus	0.749179	886.279	0.865507	0.0125514	0.0112174
k__Bacteria; p__Firmicutes; c__Clostridia; o__Clostridiales; f__Lachnospiraceae; g__; s__	0.749248	886.361	0.864742	5.96939e-05	6.8633e-05
k__Bacteria; p__Firmicutes; c__Clostridia; o__Clostridiales; f__Lachnospiraceae; g__; s__	0.752569	890.289	0.867728	0.000260847	0.000193476
k__Bacteria; p__Firmicutes; c__Clostridia; o__Clostridiales; f__Ruminococcaceae; g__; s__	0.753602	891.511	0.868073	9.24558e-05	7.6447e-05
k__Bacteria; p__Firmicutes; c__Clostridia; o__Clostridiales; f__Lachnospiraceae; g__; s__	0.753682	891.606	0.867321	2.933e-05	3.40051e-05
k__Bacteria; p__Bacteroidetes; c__Bacteroidia; o__Bacteroidales; f__Bacteroidaceae; g__Bacteroides; s__Bacteroidesfragilis	0.755303	893.524	0.868342	2.17269e-05	2.65167e-05
k__Bacteria; p__Firmicutes; c__Clostridia; o__Clostridiales; f__Lachnospiraceae; g__Clostridium; s__	0.756136	894.508	0.868455	0.00112315	0.0010042
k__Bacteria; p__Proteobacteria; c__Betaproteobacteria; o__Burkholderiales; f__Alcaligenaceae; g__Sutterella; s__	0.756358	894.772	0.867868	4.03402e-05	3.31388e-05
k__Bacteria; p__Tenericutes; c__Erysipelotrichi; o__Erysipelotrichales; f__Erysipelotrichaceae; g__Clostridium; s__Clostridiumramosum	0.760961	900.216	0.872303	0.00552771	0.00644185
k__Bacteria; p__Proteobacteria; c__Gammaproteobacteria; o__Pasteurellales; f__Pasteurellaceae; g__; s__	0.763695	903.451	0.87459	0.00783994	0.00878882
k__Bacteria; p__Bacteroidetes; c__Bacteroidia; o__Bacteroidales; f__Rikenellaceae; g__Alistipes; s__	0.76506	905.067	0.875306	0.00198113	0.0016532
k__Bacteria; p__Firmicutes; c__Clostridia; o__Clostridiales; f__Lachnospiraceae; g__Clostridium; s__	0.768429	909.052	0.878311	0.000136265	0.000119815
k__Bacteria; p__Bacteroidetes; c__Bacteroidia; o__Bacteroidales; f__Bacteroidaceae; g__Bacteroides; s__Bacteroidesfragilis	0.7695	910.318	0.878685	2.34057e-05	2.76121e-05
k__Bacteria; p__Firmicutes; c__Clostridia; o__Clostridiales; f__Lachnospiraceae; g__Roseburia; s__	0.770714	911.755	0.879224	1.41932e-05	1.73409e-05
k__Bacteria; p__Firmicutes; c__Clostridia; o__Clostridiales; f__Ruminococcaceae; g__; s__	0.772326	913.661	0.880213	0.000144817	0.000119099
k__Bacteria; p__Firmicutes; c__Clostridia; o__Clostridiales; f__Lachnospiraceae; g__; s__	0.776743	918.887	0.884396	0.000377015	0.000466736
k__Bacteria; p__Bacteroidetes; c__Bacteroidia; o__Bacteroidales; f__Porphyromonadaceae; g__Parabacteroides; s__Parabacteroidesdistasonis	0.777304	919.55	0.884183	1.41694e-05	1.73584e-05
k__Bacteria; p__Firmicutes; c__Clostridia; o__Clostridiales; f__Lachnospiraceae; g__Coprococcus; s__	0.777489	919.77	0.883545	5.98761e-05	5.15396e-05
k__Bacteria; p__Tenericutes; c__Erysipelotrichi; o__Erysipelotrichales; f__Erysipelotrichaceae; g__Clostridium; s__Clostridiumramosum	0.778316	920.747	0.883635	4.03011e-05	3.44149e-05
k__Bacteria; p__Firmicutes; c__Clostridia; o__Clostridiales; f__Ruminococcaceae; g__; s__	0.779652	922.328	0.884303	1.26753e-05	1.54109e-05
k__Bacteria; p__Firmicutes; c__Clostridia; o__Clostridiales; f__Lachnospiraceae; g__Blautia; s__	0.780257	923.044	0.884141	3.45015e-05	3.02273e-05
k__Bacteria; p__Firmicutes; c__Clostridia; o__Clostridiales; f__Lachnospiraceae; g__Ruminococcus; s__Ruminococcusgnavus	0.78143	924.432	0.884624	8.91892e-05	7.91352e-05
k__Bacteria; p__Proteobacteria; c__Gammaproteobacteria; o__Chromatiales; f__; g__; s__	0.782031	925.143	0.884458	1.70579e-05	2.07233e-05
k__Bacteria; p__Verrucomicrobia; c__Verrucomicrobiae; o__Verrucomicrobiales; f__Verrucomicrobiaceae; g__Akkermansia; s__	0.782202	925.346	0.883807	1.27532e-05	1.53634e-05
k__Bacteria; p__Firmicutes; c__Clostridia; o__Clostridiales; f__Lachnospiraceae; g__; s__	0.782712	925.949	0.883539	9.2416e-05	8.07176e-05
k__Bacteria; p__Firmicutes; c__Clostridia; o__Clostridiales; f__Ruminococcaceae; g__Faecalibacterium; s__	0.784159	927.66	0.884328	0.00986356	0.00918899
k__Bacteria; p__Firmicutes; c__Clostridia; o__Clostridiales; f__Lachnospiraceae; g__Blautia; s__	0.784401	927.946	0.883758	1.26716e-05	1.02038e-05
k__Bacteria; p__Firmicutes; c__Clostridia; o__Clostridiales; f__Ruminococcaceae; g__Faecalibacterium; s__	0.785039	928.701	0.883636	2.27252e-05	2.55958e-05
k__Bacteria; p__Firmicutes; c__Clostridia; o__Clostridiales; f__Lachnospiraceae; g__; s__	0.785625	929.395	0.883455	0.000106887	9.55388e-05
k__Bacteria; p__Firmicutes; c__Clostridia; o__Clostridiales; f__Ruminococcaceae; g__Faecalibacterium; s__	0.787366	931.453	0.884571	1.92327e-05	1.66977e-05
k__Bacteria; p__Firmicutes; c__Clostridia; o__Clostridiales; f__Clostridiaceae; g__Clostridium; s__	0.787791	931.956	0.884209	0.000141797	9.73533e-05
k__Bacteria; p__Bacteroidetes; c__Bacteroidia; o__Bacteroidales; f__Rikenellaceae; g__Alistipes; s__	0.78813	932.358	0.883752	0.000130181	0.000116895
k__Bacteria; p__Firmicutes; c__Clostridia; o__Clostridiales; f__Lachnospiraceae; g__Clostridium; s__	0.788241	932.49	0.883039	4.46615e-05	3.83691e-05
k__Bacteria; p__Firmicutes; c__Clostridia; o__Clostridiales; f__Lachnospiraceae; g__; s__	0.788455	932.743	0.882444	0.000175243	0.000194201
k__Bacteria; p__Firmicutes; c__Clostridia; o__Clostridiales; f__Lachnospiraceae; g__Clostridium; s__	0.791691	936.571	0.885228	1.91295e-05	1.535e-05
k__Bacteria; p__Firmicutes; c__Bacilli; o__Lactobacillales; f__Carnobacteriaceae; g__; s__	0.792435	937.451	0.885223	6.14758e-05	4.36566e-05
k__Bacteria; p__Firmicutes; c__Clostridia; o__Clostridiales; f__Lachnospiraceae; g__Coprococcus; s__	0.794748	940.187	0.886969	1.48056e-05	1.25741e-05
k__Bacteria; p__Firmicutes; c__Clostridia; o__Clostridiales; f__Lachnospiraceae; g__; s__	0.795019	940.507	0.886435	0.00327259	0.00362984
k__Bacteria; p__Firmicutes; c__Clostridia; o__Clostridiales; f__Ruminococcaceae; g__; s__	0.798963	945.173	0.889994	0.000330645	0.000403856
k__Bacteria; p__Proteobacteria; c__Deltaproteobacteria; o__Desulfovibrionales; f__Desulfovibrionaceae; g__Desulfovibrio; s__	0.800385	946.856	0.890739	0.000260142	0.000321564
k__Bacteria; p__Bacteroidetes; c__Bacteroidia; o__Bacteroidales; f__Bacteroidaceae; g__Bacteroides; s__	0.800554	947.055	0.890089	2.01913e-05	1.73932e-05
k__Bacteria; p__Firmicutes; c__Clostridia; o__Clostridiales; f__Ruminococcaceae; g__Faecalibacterium; s__	0.803004	949.954	0.891976	4.73168e-05	4.27015e-05
k__Bacteria; p__Bacteroidetes; c__Bacteroidia; o__Bacteroidales; f__Bacteroidaceae; g__Bacteroides; s__	0.803414	950.439	0.891594	1.88653e-05	2.14791e-05
k__Bacteria; p__Bacteroidetes; c__Bacteroidia; o__Bacteroidales; f__Bacteroidaceae; g__Bacteroides; s__Bacteroidesfragilis	0.805117	952.454	0.892647	1.87614e-05	2.15202e-05
k__Bacteria; p__Firmicutes; c__Clostridia; o__Clostridiales; f__Ruminococcaceae; g__; s__	0.806829	954.478	0.893706	4.58074e-05	5.0886e-05
k__Bacteria; p__Firmicutes; c__Clostridia; o__Clostridiales; f__Lachnospiraceae; g__Roseburia; s__Roseburiafaecis	0.807319	955.058	0.893413	1.96986e-05	2.29454e-05
k__Bacteria; p__Firmicutes; c__Clostridia; o__Clostridiales; f__Ruminococcaceae; g__; s__	0.810103	958.352	0.895656	3.52075e-05	4.01001e-05
k__Bacteria; p__Firmicutes; c__Bacilli; o__Lactobacillales; f__Streptococcaceae; g__Streptococcus; s__Streptococcussanguinis	0.810465	958.78	0.895219	0.00135847	0.00118306
k__Bacteria; p__Firmicutes; c__Clostridia; o__Clostridiales; f__Lachnospiraceae; g__Blautia; s__	0.811218	959.671	0.895216	1.42229e-05	1.68871e-05
k__Bacteria; p__Firmicutes; c__Clostridia; o__Clostridiales; f__Lachnospiraceae; g__Roseburia; s__	0.812208	960.842	0.895473	4.59706e-05	5.18327e-05
k__Bacteria; p__Firmicutes; c__Clostridia; o__Clostridiales; f__Lachnospiraceae; g__Clostridium; s__	0.816206	965.571	0.899042	2.75463e-05	3.10018e-05
k__Bacteria; p__Bacteroidetes; c__Bacteroidia; o__Bacteroidales; f__Rikenellaceae; g__Alistipes; s__	0.816498	965.917	0.898527	2.59072e-05	2.16413e-05
k__Bacteria; p__Proteobacteria; c__Deltaproteobacteria; o__Desulfovibrionales; f__Desulfovibrionaceae; g__Bilophila; s__Bilophilawadsworthia	0.819732	969.743	0.901248	0.00372216	0.00406212
k__Bacteria; p__Firmicutes; c__Clostridia; o__Clostridiales; f__Ruminococcaceae; g__Faecalibacterium; s__	0.821276	971.569	0.902107	0.00252568	0.00240708
k__Bacteria; p__Firmicutes; c__Clostridia; o__Clostridiales; f__Lachnospiraceae; g__Blautia; s__Blautiaproducta	0.821675	972.042	0.901709	1.65235e-05	1.88558e-05
k__Bacteria; p__Firmicutes; c__Clostridia; o__Clostridiales; f__Ruminococcaceae; g__; s__	0.822487	973.002	0.901762	8.64557e-05	0.000101729
k__Bacteria; p__Bacteroidetes; c__Bacteroidia; o__Bacteroidales; f__Porphyromonadaceae; g__Parabacteroides; s__Parabacteroidesdistasonis	0.82289	973.479	0.901369	2.8366e-05	3.2107e-05
k__Bacteria; p__Bacteroidetes; c__Bacteroidia; o__Bacteroidales; f__Rikenellaceae; g__; s__	0.828705	980.357	0.906899	3.17016e-05	3.66957e-05
k__Bacteria; p__Firmicutes; c__Clostridia; o__Clostridiales; f__Lachnospiraceae; g__; s__	0.832391	984.718	0.910091	3.79912e-05	4.28422e-05
k__Bacteria; p__Firmicutes; c__Clostridia; o__Clostridiales; f__Lachnospiraceae; g__Clostridium; s__	0.833893	986.496	0.910892	1.86484e-05	2.10613e-05
k__Bacteria; p__Bacteroidetes; c__Bacteroidia; o__Bacteroidales; f__Bacteroidaceae; g__Bacteroides; s__	0.83478	987.545	0.911019	2.38864e-05	2.65523e-05
k__Bacteria; p__Bacteroidetes; c__Bacteroidia; o__Bacteroidales; f__Bacteroidaceae; g__Bacteroides; s__	0.836732	989.854	0.912308	1.50938e-05	1.71003e-05
k__Bacteria; p__Firmicutes; c__Clostridia; o__Clostridiales; f__Ruminococcaceae; g__Faecalibacterium; s__	0.83724	990.455	0.912021	2.89097e-05	2.47062e-05
k__Bacteria; p__Bacteroidetes; c__Bacteroidia; o__Bacteroidales; f__Bacteroidaceae; g__Bacteroides; s__Bacteroidescaccae	0.838684	992.163	0.912753	3.03264e-05	2.76468e-05
k__Bacteria; p__Firmicutes; c__Clostridia; o__Clostridiales; f__Lachnospiraceae; g__Clostridium; s__Clostridiumbolteae	0.83883	992.336	0.912074	9.85575e-05	0.000107834
k__Bacteria; p__Firmicutes; c__Clostridia; o__Clostridiales; f__Ruminococcaceae; g__Faecalibacterium; s__	0.839418	993.031	0.911874	0.0260052	0.024713
k__Bacteria; p__Bacteroidetes; c__Bacteroidia; o__Bacteroidales; f__; g__; s__	0.840341	994.124	0.91204	0.00519681	0.00442927
k__Bacteria; p__Firmicutes; c__Clostridia; o__Clostridiales; f__Lachnospiraceae; g__; s__	0.843466	997.82	0.914593	4.06218e-05	3.68341e-05
k__Bacteria; p__Firmicutes; c__Clostridia; o__Clostridiales; f__Ruminococcaceae; g__Faecalibacterium; s__	0.844358	998.876	0.914721	1.70671e-05	1.90987e-05
k__Bacteria; p__Firmicutes; c__Clostridia; o__Clostridiales; f__Ruminococcaceae; g__; s__	0.845834	1000.62	0.915482	0.00543387	0.00505536
k__Bacteria; p__Tenericutes; c__Erysipelotrichi; o__Erysipelotrichales; f__Erysipelotrichaceae; g__Clostridium; s__Clostridiumramosum	0.849154	1004.55	0.918235	1.73627e-05	1.9738e-05
k__Bacteria; p__Bacteroidetes; c__Bacteroidia; o__Bacteroidales; f__Bacteroidaceae; g__Bacteroides; s__	0.849428	1004.87	0.917693	2.23747e-05	2.50552e-05
k__Bacteria; p__Firmicutes; c__Clostridia; o__Clostridiales; f__Lachnospiraceae; g__Ruminococcus; s__Ruminococcusgnavus	0.850738	1006.42	0.918269	1.06838e-05	9.33185e-06
k__Bacteria; p__Firmicutes; c__Clostridia; o__Clostridiales; f__Lachnospiraceae; g__Lachnospira; s__	0.851244	1007.02	0.917978	1.30594e-05	1.48764e-05
k__Bacteria; p__Firmicutes; c__Clostridia; o__Clostridiales; f__Ruminococcaceae; g__Faecalibacterium; s__	0.85201	1007.93	0.917967	3.54668e-05	3.83523e-05
k__Bacteria; p__Firmicutes; c__Clostridia; o__Clostridiales; f__Lachnospiraceae; g__; s__	0.852568	1008.59	0.917732	0.00112863	0.00120077
k__Bacteria; p__Firmicutes; c__Clostridia; o__Clostridiales; f__Ruminococcaceae; g__Ruminococcus; s__	0.853115	1009.23	0.917486	0.00131169	0.00142442
k__Bacteria; p__Bacteroidetes; c__Bacteroidia; o__Bacteroidales; f__Bacteroidaceae; g__Bacteroides; s__	0.854453	1010.82	0.91809	1.65771e-05	1.84745e-05
k__Bacteria; p__Bacteroidetes; c__Bacteroidia; o__Bacteroidales; f__Bacteroidaceae; g__Bacteroides; s__	0.8554	1011.94	0.918275	9.71547e-05	9.27801e-05
k__Bacteria; p__Firmicutes; c__Clostridia; o__Clostridiales; f__Lachnospiraceae; g__Lachnobacterium; s__	0.855592	1012.17	0.917648	0.000364269	0.000337686
k__Bacteria; p__Bacteroidetes; c__Bacteroidia; o__Bacteroidales; f__Bacteroidaceae; g__Bacteroides; s__	0.856926	1013.74	0.918246	5.65455e-05	5.28898e-05
k__Bacteria; p__Bacteroidetes; c__Bacteroidia; o__Bacteroidales; f__Rikenellaceae; g__Alistipes; s__	0.859303	1016.56	0.91996	0.000120987	0.000105494
k__Bacteria; p__Firmicutes; c__Clostridia; o__Clostridiales; f__Lachnospiraceae; g__; s__	0.860198	1017.61	0.920086	1.17117e-05	1.03505e-05
k__Bacteria; p__Tenericutes; c__Erysipelotrichi; o__Erysipelotrichales; f__Erysipelotrichaceae; g__Clostridium; s__Clostridiumramosum	0.865391	1023.76	0.924803	1.81939e-05	1.63138e-05
k__Bacteria; p__Firmicutes; c__Clostridia; o__Clostridiales; f__Ruminococcaceae; g__Oscillospira; s__	0.865494	1023.88	0.924079	2.11877e-05	1.88653e-05
k__Bacteria; p__Firmicutes; c__Clostridia; o__Clostridiales; f__Ruminococcaceae; g__Faecalibacterium; s__	0.865544	1023.94	0.923298	1.59388e-05	1.44657e-05
k__Bacteria; p__Bacteroidetes; c__Bacteroidia; o__Bacteroidales; f__Porphyromonadaceae; g__; s__	0.86566	1024.08	0.92259	6.76591e-05	5.92558e-05
k__Bacteria; p__Firmicutes; c__Clostridia; o__Clostridiales; f__Lachnospiraceae; g__Roseburia; s__Eubacteriumrectale	0.867503	1026.26	0.923722	4.84187e-05	4.47645e-05
k__Bacteria; p__Firmicutes; c__Bacilli; o__Lactobacillales; f__Streptococcaceae; g__Streptococcus; s__	0.868756	1027.74	0.924225	0.000735684	0.00067598
k__Bacteria; p__Firmicutes; c__Clostridia; o__Clostridiales; f__Lachnospiraceae; g__Roseburia; s__	0.870246	1029.5	0.924979	0.00208503	0.00195207
k__Bacteria; p__Firmicutes; c__Clostridia; o__Clostridiales; f__Lachnospiraceae; g__; s__	0.872638	1032.33	0.926688	0.000151126	0.000141705
k__Bacteria; p__Firmicutes; c__Clostridia; o__Clostridiales; f__Lachnospiraceae; g__Clostridium; s__	0.873396	1033.23	0.926662	1.4228e-05	1.26254e-05
k__Bacteria; p__Firmicutes; c__Clostridia; o__Clostridiales; f__Ruminococcaceae; g__Faecalibacterium; s__	0.87628	1036.64	0.928889	0.000170908	0.0001608
k__Bacteria; p__Firmicutes; c__Clostridia; o__Clostridiales; f__Lachnospiraceae; g__Clostridium; s__Clostridiumbolteae	0.881311	1042.59	0.933385	2.74638e-05	2.97602e-05
k__Bacteria; p__Firmicutes; c__Clostridia; o__Clostridiales; f__Lachnospiraceae; g__; s__	0.885761	1047.86	0.937259	1.91627e-05	2.07452e-05
k__Bacteria; p__Firmicutes; c__Clostridia; o__Clostridiales; f__Ruminococcaceae; g__Faecalibacterium; s__	0.886713	1048.98	0.937427	1.76734e-05	1.90579e-05
k__Bacteria; p__Firmicutes; c__Clostridia; o__Clostridiales; f__Lachnospiraceae; g__Coprococcus; s__	0.887885	1050.37	0.937829	2.55119e-05	2.35112e-05
k__Bacteria; p__Firmicutes; c__Clostridia; o__Clostridiales; f__Lachnospiraceae; g__Lachnospira; s__	0.889054	1051.75	0.938225	2.24286e-05	2.02987e-05
k__Bacteria; p__Firmicutes; c__Clostridia; o__Clostridiales; f__Lachnospiraceae; g__; s__	0.89201	1055.25	0.940506	7.95217e-05	8.42928e-05
k__Bacteria; p__Bacteroidetes; c__Bacteroidia; o__Bacteroidales; f__Bacteroidaceae; g__Bacteroides; s__Bacteroidesuniformis	0.892632	1055.98	0.940324	2.13001e-05	1.98008e-05
k__Bacteria; p__Firmicutes; c__Clostridia; o__Clostridiales; f__Ruminococcaceae; g__; s__	0.893363	1056.85	0.940257	0.000780262	0.000821097
k__Bacteria; p__Firmicutes; c__Clostridia; o__Clostridiales; f__Lachnospiraceae; g__; s__	0.89572	1059.64	0.941899	2.61745e-05	2.7871e-05
k__Bacteria; p__Bacteroidetes; c__Bacteroidia; o__Bacteroidales; f__Porphyromonadaceae; g__Parabacteroides; s__	0.899177	1063.73	0.944695	0.000145178	0.00015187
k__Bacteria; p__Firmicutes; c__Clostridia; o__Clostridiales; f__Lachnospiraceae; g__Clostridium; s__	0.899429	1064.02	0.944121	1.40057e-05	1.29139e-05
k__Bacteria; p__Firmicutes; c__Clostridia; o__Clostridiales; f__Lachnospiraceae; g__Blautia; s__	0.899442	1064.04	0.943297	0.000662985	0.000636482
k__Bacteria; p__Firmicutes; c__Bacilli; o__Lactobacillales; f__Carnobacteriaceae; g__Granulicatella; s__Granulicatellaadiacens	0.902279	1067.4	0.945435	0.000301411	0.000267785
k__Bacteria; p__Firmicutes; c__Clostridia; o__Clostridiales; f__Lachnospiraceae; g__; s__	0.902952	1068.19	0.945303	1.67099e-05	1.81137e-05
k__Bacteria; p__Firmicutes; c__Clostridia; o__Clostridiales; f__Ruminococcaceae; g__Faecalibacterium; s__	0.904033	1069.47	0.945598	2.37724e-05	2.23113e-05
k__Bacteria; p__Firmicutes; c__Clostridia; o__Clostridiales; f__Ruminococcaceae; g__Faecalibacterium; s__	0.90409	1069.54	0.944822	0.000155005	0.000160481
k__Bacteria; p__Firmicutes; c__Clostridia; o__Clostridiales; f__Lachnospiraceae; g__; s__	0.904184	1069.65	0.944087	6.59603e-05	6.91187e-05
k__Bacteria; p__Firmicutes; c__Clostridia; o__Clostridiales; f__Lachnospiraceae; g__Clostridium; s__	0.908582	1074.85	0.947842	0.000386296	0.000369077
k__Bacteria; p__Firmicutes; c__Clostridia; o__Clostridiales; f__Ruminococcaceae; g__; s__	0.909004	1075.35	0.947446	2.3989e-05	2.59053e-05
k__Bacteria; p__Firmicutes; c__Clostridia; o__Clostridiales; f__Ruminococcaceae; g__; s__	0.91207	1078.98	0.949805	1.4522e-05	1.33755e-05
k__Bacteria; p__Proteobacteria; c__Gammaproteobacteria; o__Pasteurellales; f__Pasteurellaceae; g__; s__	0.913867	1081.1	0.950839	6.27046e-05	6.5568e-05
k__Bacteria; p__Firmicutes; c__Clostridia; o__Clostridiales; f__Ruminococcaceae; g__; s__	0.914574	1081.94	0.950739	2.00482e-05	2.21253e-05
k__Bacteria; p__Actinobacteria; c__Actinobacteria; o__Actinomycetales; f__Micrococcaceae; g__Rothia; s__Rothiamucilaginosa	0.916766	1084.53	0.952181	6.03851e-05	5.51924e-05
k__Bacteria; p__Bacteroidetes; c__Bacteroidia; o__Bacteroidales; f__Bacteroidaceae; g__Bacteroides; s__	0.919914	1088.26	0.954613	2.41725e-05	2.5628e-05
k__Bacteria; p__Bacteroidetes; c__Bacteroidia; o__Bacteroidales; f__Bacteroidaceae; g__Bacteroides; s__	0.920692	1089.18	0.954583	3.61491e-05	3.75498e-05
k__Bacteria; p__Firmicutes; c__Clostridia; o__Clostridiales; f__Ruminococcaceae; g__Oscillospira; s__	0.923005	1091.92	0.956143	0.000280743	0.000268847
k__Bacteria; p__Firmicutes; c__Clostridia; o__Clostridiales; f__Lachnospiraceae; g__Blautia; s__	0.927593	1097.34	0.960055	3.75444e-05	3.56327e-05
k__Bacteria; p__Bacteroidetes; c__Bacteroidia; o__Bacteroidales; f__Bacteroidaceae; g__Bacteroides; s__	0.930361	1100.62	0.962077	9.38513e-06	9.9454e-06
k__Bacteria; p__Firmicutes; c__Clostridia; o__Clostridiales; f__Ruminococcaceae; g__; s__	0.930439	1100.71	0.961318	0.000115634	0.000121278
k__Bacteria; p__Bacteroidetes; c__Bacteroidia; o__Bacteroidales; f__Bacteroidaceae; g__Bacteroides; s__	0.931379	1101.82	0.96145	4.30998e-05	4.49457e-05
k__Bacteria; p__Firmicutes; c__Clostridia; o__Clostridiales; f__Lachnospiraceae; g__Dorea; s__Doreaformicigenerans	0.93322	1104	0.96251	0.00429787	0.00419252
k__Bacteria; p__Firmicutes; c__Clostridia; o__Clostridiales; f__Lachnospiraceae; g__Clostridium; s__	0.933446	1104.27	0.961905	2.09949e-05	2.21748e-05
k__Bacteria; p__Firmicutes; c__Clostridia; o__Clostridiales; f__Ruminococcaceae; g__; s__	0.933766	1104.65	0.961397	0.00204859	0.00212471
k__Bacteria; p__Firmicutes; c__Clostridia; o__Clostridiales; f__Lachnospiraceae; g__Clostridium; s__	0.935342	1106.51	0.962182	1.3698e-05	1.45039e-05
k__Bacteria; p__Firmicutes; c__Clostridia; o__Clostridiales; f__Ruminococcaceae; g__Faecalibacterium; s__	0.9428	1115.33	0.969012	1.13083e-05	1.19103e-05
k__Bacteria; p__Firmicutes; c__Clostridia; o__Clostridiales; f__Lachnospiraceae; g__; s__	0.942848	1115.39	0.96822	1.39928e-05	1.47211e-05
k__Bacteria; p__Firmicutes; c__Clostridia; o__Clostridiales; f__Ruminococcaceae; g__Anaerotruncus; s__	0.944369	1117.19	0.968941	2.93085e-05	2.81527e-05
k__Bacteria; p__Firmicutes; c__Clostridia; o__Clostridiales; f__Lachnospiraceae; g__; s__	0.945551	1118.59	0.969313	5.89293e-05	5.71635e-05
k__Bacteria; p__Firmicutes; c__Clostridia; o__Clostridiales; f__Ruminococcaceae; g__Faecalibacterium; s__	0.952962	1127.35	0.976064	2.07117e-05	2.00654e-05
k__Bacteria; p__Firmicutes; c__Clostridia; o__Clostridiales; f__Lachnospiraceae; g__Lachnospira; s__	0.953627	1128.14	0.975901	0.00035211	0.000340667
k__Bacteria; p__Firmicutes; c__Clostridia; o__Clostridiales; f__Lachnospiraceae; g__; s__	0.95528	1130.1	0.976747	9.55538e-06	9.17083e-06
k__Bacteria; p__Firmicutes; c__Clostridia; o__Clostridiales; f__Ruminococcaceae; g__Faecalibacterium; s__	0.956455	1131.49	0.977104	0.000244516	0.000253241
k__Bacteria; p__Bacteroidetes; c__Bacteroidia; o__Bacteroidales; f__Bacteroidaceae; g__Bacteroides; s__	0.958053	1133.38	0.977892	0.000365091	0.000361313
k__Bacteria; p__Bacteroidetes; c__Bacteroidia; o__Bacteroidales; f__Bacteroidaceae; g__Bacteroides; s__Bacteroidesfragilis	0.958817	1134.28	0.977828	2.34757e-05	2.41076e-05
k__Bacteria; p__Firmicutes; c__Clostridia; o__Clostridiales; f__Lachnospiraceae; g__Clostridium; s__	0.960514	1136.29	0.978715	0.000591026	0.000577718
k__Bacteria; p__Bacteroidetes; c__Bacteroidia; o__Bacteroidales; f__Prevotellaceae; g__; s__	0.961236	1137.14	0.978608	0.000438606	0.000461771
k__Bacteria; p__Firmicutes; c__Clostridia; o__Clostridiales; f__Lachnospiraceae; g__Ruminococcus; s__	0.961679	1137.67	0.978216	2.1067e-05	2.02796e-05
k__Bacteria; p__Bacteroidetes; c__Bacteroidia; o__Bacteroidales; f__Bacteroidaceae; g__Bacteroides; s__	0.964235	1140.69	0.979974	1.47436e-05	1.51515e-05
k__Bacteria; p__Firmicutes; c__Clostridia; o__Clostridiales; f__Lachnospiraceae; g__Clostridium; s__	0.966307	1143.14	0.981237	2.02553e-05	1.96883e-05
k__Bacteria; p__Bacteroidetes; c__Bacteroidia; o__Bacteroidales; f__Bacteroidaceae; g__Bacteroides; s__	0.966322	1143.16	0.980411	3.73804e-05	3.64344e-05
k__Bacteria; p__Firmicutes; c__Clostridia; o__Clostridiales; f__Ruminococcaceae; g__Faecalibacterium; s__	0.966679	1143.58	0.979933	2.39919e-05	2.33729e-05
k__Bacteria; p__Bacteroidetes; c__Bacteroidia; o__Bacteroidales; f__Bacteroidaceae; g__Bacteroides; s__	0.968812	1146.11	0.981254	2.9393e-05	2.98931e-05
k__Bacteria; p__Actinobacteria; c__Actinobacteria; o__Actinomycetales; f__Actinomycetaceae; g__Actinomyces; s__	0.971643	1149.45	0.983279	3.21803e-05	3.15713e-05
k__Bacteria; p__Proteobacteria; c__Gammaproteobacteria; o__Enterobacteriales; f__Enterobacteriaceae; g__Proteus; s__	0.972613	1150.6	0.98342	3.09173e-05	2.99485e-05
k__Bacteria; p__Firmicutes; c__Clostridia; o__Clostridiales; f__Lachnospiraceae; g__Clostridium; s__	0.984031	1164.11	0.994115	0.000154781	0.000155963
k__Bacteria; p__Bacteroidetes; c__Bacteroidia; o__Bacteroidales; f__Bacteroidaceae; g__Bacteroides; s__	0.985305	1165.62	0.994553	0.00015986	0.000162338
k__Bacteria; p__Bacteroidetes; c__Bacteroidia; o__Bacteroidales; f__Bacteroidaceae; g__Bacteroides; s__	0.986876	1167.47	0.99529	1.55836e-05	1.54079e-05
k__Bacteria; p__Bacteroidetes; c__Bacteroidia; o__Bacteroidales; f__Bacteroidaceae; g__Bacteroides; s__	0.987831	1168.6	0.995404	0.198719	0.198321
k__Bacteria; p__Firmicutes; c__Clostridia; o__Clostridiales; f__Veillonellaceae; g__Phascolarctobacterium; s__	0.989339	1170.39	0.996075	1.67502e-05	1.68858e-05
k__Bacteria; p__Firmicutes; c__Clostridia; o__Clostridiales; f__Lachnospiraceae; g__Clostridium; s__	0.989382	1170.44	0.995271	4.20103e-05	4.23804e-05
k__Bacteria; p__Bacteroidetes; c__Bacteroidia; o__Bacteroidales; f__Bacteroidaceae; g__Bacteroides; s__	0.992035	1173.58	0.997092	1.90427e-05	1.88885e-05
k__Bacteria; p__Tenericutes; c__Erysipelotrichi; o__Erysipelotrichales; f__Erysipelotrichaceae; g__; s__MLG480	0.992621	1174.27	0.996834	0.000595	0.000590649
k__Bacteria; p__Firmicutes; c__Clostridia; o__Clostridiales; f__Lachnospiraceae; g__Clostridium; s__	0.993437	1175.24	0.996808	1.96128e-05	1.96944e-05
k__Bacteria; p__Bacteroidetes; c__Bacteroidia; o__Bacteroidales; f__Bacteroidaceae; g__Bacteroides; s__	0.994066	1175.98	0.996593	4.10477e-05	4.11777e-05
k__Bacteria; p__Firmicutes; c__Clostridia; o__Clostridiales; f__Lachnospiraceae; g__Coprococcus; s__	0.994707	1176.74	0.996391	2.19072e-05	2.18229e-05
k__Bacteria; p__Bacteroidetes; c__Bacteroidia; o__Bacteroidales; f__Bacteroidaceae; g__Bacteroides; s__	0.996628	1179.01	0.997472	8.01299e-05	8.02503e-05
k__Bacteria; p__Bacteroidetes; c__Bacteroidia; o__Bacteroidales; f__Bacteroidaceae; g__Bacteroides; s__	0.997481	1180.02	0.997481	3.6391e-05	3.64345e-05
