# Supplementary material for: A Modular Organization of the Human Intestinal Mucosal Microbiota and Its Association with Inflammatory Bowel Disease
Source: PLoS One. 2013 Nov 19;8(11):e80702. doi: 10.1371/journal.pone.0080702 (PMC3834335; doi:10.1371/journal.pone.0080702)
Supplement: Dataset S5 — Relative abundances of metabolic pathways in each FMC from Tong dataset. (XLSX) [file pone.0080702.s016.xlsx]

## Sheet: Sheet1
NAME	blue	brown	green	turquoise	yellow
ko00010: Glycolysis / Gluconeogenesis	0.0138157	0.0102266	0.0134548	0.0109462	0.0127764
ko00020: Citrate cycle (TCA cycle)	0.00731303	0.0117383	0.00710431	0.0106026	0.0142438
ko00030: Pentose phosphate pathway	0.0209419	0.0142385	0.0174065	0.0114772	0.0146653
ko00040: Pentose and glucuronate interconversions	0.00997646	0.00992187	0.00812062	0.00706839	0.00635345
ko00051: Fructose and mannose metabolism	0.0166483	0.0120609	0.0166015	0.00813936	0.00915114
ko00052: Galactose metabolism	0.0106768	0.00995445	0.0119439	0.0055518	0.00925632
ko00053: Ascorbate and aldarate metabolism	0.00269522	0.00266158	0.00206996	0.00565035	0.00401503
ko00061: Fatty acid biosynthesis	0.0172784	0.0144576	0.0176743	0.0153753	0.0176705
ko00062: Fatty acid elongation in mitochondria	0.000148237	0	0	0.00304333	0.000645272
ko00071: Fatty acid metabolism	0.00475482	0.00389	0.0052324	0.0149385	0.00613009
ko00072: Synthesis and degradation of ketone bodies	0.00425845	0.00214974	0.00655488	0.0143331	0.00516218
ko00100: Steroid biosynthesis	1.68451e-05	0	0	9.81721e-05	0
ko00130: Ubiquinone and other terpenoid-quinone biosynthesis	0.00143386	0.00454516	0.00134548	0.00616521	0.00490407
ko00140: Steroid hormone biosynthesis	5.98938e-05	0.00225211	0	0.000392688	0
ko00190: Oxidative phosphorylation	0.00441702	0.00533111	0.00494379	0.0046932	0.00481135
ko00195: Photosynthesis	0.00515292	0.00391559	0.00439867	0.00322741	0.00572679
ko00196: Photosynthesis - antenna proteins	0	0	0	7.47978e-05	0
ko00230: Purine metabolism	0.00774819	0.00728795	0.00764204	0.00631271	0.0095869
ko00240: Pyrimidine metabolism	0.0103252	0.0100239	0.010083	0.00701603	0.0120795
ko00250: Alanine, aspartate and glutamate metabolism	0.0172075	0.0193363	0.0180419	0.0115625	0.0158689
ko00253: Tetracycline biosynthesis	0.00821743	0.00436772	0.00835651	0.00654481	0.00860363
ko00260: Glycine, serine and threonine metabolism	0.0109648	0.0104777	0.0115471	0.00955157	0.0107798
ko00270: Cysteine and methionine metabolism	0.0122771	0.0104602	0.013967	0.00898423	0.0118104
ko00280: Valine, leucine and isoleucine degradation	0.00411718	0.00444773	0.00299788	0.0128504	0.00409414
ko00281: Geraniol degradation	0.00203489	0.00429948	0.000172497	0.0218433	0.00322636
ko00290: Valine, leucine and isoleucine biosynthesis	0.0279617	0.0205481	0.0319903	0.0184564	0.0267495
ko00300: Lysine biosynthesis	0.0184434	0.0156624	0.0219761	0.0114665	0.0162609
ko00310: Lysine degradation	0.00244966	0.00141041	0.00153331	0.00884276	0.0022943
ko00311: Penicillin and cephalosporin biosynthesis	0.00024642	0.00368526	0	0.00258052	0.00221236
ko00312: beta-Lactam resistance	0.00274912	0.00491369	0.000517491	0.00343602	0.00193582
ko00330: Arginine and proline metabolism	0.0089892	0.00844296	0.00872889	0.00742991	0.00745648
ko00340: Histidine metabolism	0.015672	0.0178444	0.0148529	0.0106439	0.0119545
ko00350: Tyrosine metabolism	0.00651548	0.00566659	0.00652149	0.00686571	0.00566174
ko00351: DDT degradation	0	0.000307105	0	0.000687205	0.00129054
ko00360: Phenylalanine metabolism	0.00328402	0.00373251	0.00249457	0.00561846	0.00277963
ko00361: Chlorocyclohexane and chlorobenzene degradation	0.000544434	0.000614211	6.89987e-05	0.00475153	0.000516218
ko00362: Benzoate degradation	0.00342577	0.001681	0.00363151	0.00692372	0.00237732
ko00363: Bisphenol degradation	0.0116254	0.00798474	0.0133398	0.0108644	0.00430182
ko00364: Fluorobenzoate degradation	0.000249308	0.000767763	0	0.00358328	0
ko00380: Tryptophan metabolism	0.00205358	0.00174357	0.00164707	0.00875315	0.00283087
ko00400: Phenylalanine, tyrosine and tryptophan biosynthesis	0.0120728	0.0115709	0.013043	0.00804378	0.0119896
ko00410: beta-Alanine metabolism	0.00555552	0.00560467	0.00357931	0.0132287	0.00322636
ko00430: Taurine and hypotaurine metabolism	0.00545108	0.00936671	0.00526115	0.00741199	0.00580745
ko00440: Phosphonate and phosphinate metabolism	0.0012552	0.00175489	0.00133069	0.00185125	0.00276545
ko00450: Selenocompound metabolism	0.0108851	0.0139221	0.0117298	0.0116236	0.0139379
ko00460: Cyanoamino acid metabolism	0.00871711	0.0119332	0.00689987	0.006844	0.00792763
ko00471: D-Glutamine and D-glutamate metabolism	0.0189564	0.0184263	0.0197796	0.0115189	0.0232298
ko00473: D-Alanine metabolism	0.017465	0.00818948	0.0165597	0.0120424	0.018928
ko00480: Glutathione metabolism	0.00338747	0.00407319	0.00196102	0.0101479	0.00692819
ko00500: Starch and sucrose metabolism	0.0106542	0.00964311	0.0129545	0.00620448	0.00767874
ko00510: N-Glycan biosynthesis	0.000271972	0.000446699	9.40892e-05	0.000249893	0.000234645
ko00511: Other glycan degradation	0.0043393	0.0307105	0.00353619	0.00250339	0.00387163
ko00513: Various types of N-glycan biosynthesis	4.31235e-06	0	0	0	0
ko00514: Other types of O-glycan biosynthesis	0	0	0	2.80492e-05	0
ko00520: Amino sugar and nucleotide sugar metabolism	0.0110404	0.0122615	0.0106181	0.007352	0.0107545
ko00521: Streptomycin biosynthesis	0.0130688	0.0200642	0.0123431	0.00955542	0.0120451
ko00523: Polyketide sugar unit biosynthesis	0.00466947	0.00813829	0.00482991	0.00284699	0.00371032
ko00531: Glycosaminoglycan degradation	0.000523643	0.0152675	0.000887127	0.000785377	0.00184364
ko00540: Lipopolysaccharide biosynthesis	0.00139792	0.0141678	0.00055199	0.00879622	0.0104964
ko00550: Peptidoglycan biosynthesis	0.0175955	0.0171332	0.0175402	0.0124834	0.0195619
ko00561: Glycerolipid metabolism	0.00679701	0.00295589	0.00620989	0.0041355	0.0053235
ko00562: Inositol phosphate metabolism	0.00197103	0.00186934	0.00152997	0.00230491	0.00302997
ko00564: Glycerophospholipid metabolism	0.0063432	0.00497511	0.00652038	0.00526202	0.00574292
ko00565: Ether lipid metabolism	0.000572734	0.000153553	0.000258745	0.000539946	0
ko00590: Arachidonic acid metabolism	0.000481289	0.000526466	0.000246424	0.00227198	0.00110618
ko00591: Linoleic acid metabolism	0.00751966	0.00532316	0.00689987	0.00484316	0.00344145
ko00592: alpha-Linolenic acid metabolism	0.000154013	0.000350978	0	0.0032537	0
ko00600: Sphingolipid metabolism	0.0023125	0.00712485	0.00282895	0.000863914	0.00129054
ko00601: Glycosphingolipid biosynthesis - lacto and neolacto series	0	9.4494e-05	0	0	0
ko00620: Pyruvate metabolism	0.0130419	0.0118526	0.0141541	0.0119823	0.0124869
ko00621: Dioxin degradation	0.00472819	0.00122842	0.00561847	0.00499275	0.00442473
ko00622: Xylene degradation	0.00316958	0.000737053	0.00386393	0.00251321	0.00232298
ko00623: Toluene degradation	0.00113969	0.00412399	0.00167568	0.00670375	0.0127211
ko00624: Polycyclic aromatic hydrocarbon degradation	0.00326597	0.00339622	0.0035717	0.00411168	0.00288475
ko00625: Chloroalkane and chloroalkene degradation	0.0102418	0.00529166	0.012579	0.0106328	0.006552
ko00626: Naphthalene degradation	0.00869786	0.00693181	0.00931483	0.0100416	0.00479345
ko00627: Aminobenzoate degradation	0.00290365	0.00274347	0.00227696	0.00696367	0.00266713
ko00630: Glyoxylate and dicarboxylate metabolism	0.00730323	0.00688661	0.00761077	0.00973391	0.00688291
ko00633: Nitrotoluene degradation	0.00354789	0.00111675	0.00282268	0.00381979	0.00375431
ko00640: Propanoate metabolism	0.00807586	0.00684938	0.00802894	0.0121376	0.0078997
ko00642: Ethylbenzene degradation	0.00728608	0.00675632	0.00425492	0.00687205	0.00172073
ko00643: Styrene degradation	0.00106012	0.000136491	0.00183997	0.00418868	0.00114715
ko00650: Butanoate metabolism	0.00849379	0.00645799	0.00782643	0.0131046	0.0119468
ko00660: C5-Branched dibasic acid metabolism	0.0287041	0.0169932	0.0328894	0.0186527	0.0266713
ko00670: One carbon pool by folate	0.0201179	0.0197425	0.0194182	0.0121453	0.0180676
ko00680: Methane metabolism	0.00659604	0.00491369	0.00626182	0.00431957	0.00469037
ko00710: Carbon fixation in photosynthetic organisms	0.0176357	0.0154918	0.0151797	0.010559	0.0140526
ko00720: Carbon fixation pathways in prokaryotes	0.0104844	0.0134404	0.0102686	0.0114573	0.0143478
ko00730: Thiamine metabolism	0.0202681	0.0171979	0.0223932	0.0126374	0.0185369
ko00740: Riboflavin metabolism	0.00915926	0.0112605	0.0105223	0.00873732	0.0109696
ko00750: Vitamin B6 metabolism	0.0101947	0.0128984	0.00957357	0.00805011	0.0122602
ko00760: Nicotinate and nicotinamide metabolism	0.00953209	0.00962264	0.00850984	0.00813738	0.0110413
ko00770: Pantothenate and CoA biosynthesis	0.0180688	0.0160514	0.0190437	0.0133252	0.0151424
ko00780: Biotin metabolism	0.010134	0.0167065	0.0146277	0.00903183	0.011873
ko00785: Lipoic acid metabolism	0.00250655	0.0165837	0.00103498	0.0102099	0.00903381
ko00790: Folate biosynthesis	0.00742982	0.0160718	0.0104073	0.0093918	0.0144111
ko00791: Atrazine degradation	0.000723859	0.000350978	0.000689987	0.00370249	0.00184364
ko00830: Retinol metabolism	0.00171596	0.00109193	0.00183997	0.00261792	0.00172073
ko00860: Porphyrin and chlorophyll metabolism	0.00865115	0.00491369	0.00889172	0.005631	0.00399338
ko00900: Terpenoid backbone biosynthesis	0.0127873	0.0126937	0.0149881	0.0104499	0.0126187
ko00901: Indole alkaloid biosynthesis	0	0	0	7.85377e-05	0
ko00903: Limonene and pinene degradation	0.00723299	0.00480201	0.00526899	0.0168142	0.00375431
ko00906: Carotenoid biosynthesis	2.85376e-05	0	0	0.000716079	0
ko00908: Zeatin biosynthesis	0.00479749	0.00767763	0.00500241	0.00304333	0.00580745
ko00910: Nitrogen metabolism	0.00578718	0.00631409	0.00627888	0.00602384	0.00624624
ko00920: Sulfur metabolism	0.00527926	0.00790796	0.00668425	0.00760834	0.00629141
ko00930: Caprolactam degradation	0.00142462	0.000701955	0.000197139	0.017671	0.004056
ko00940: Phenylpropanoid biosynthesis	0.00521629	0.00793749	0.00403377	0.00274882	0.00198545
ko00941: Flavonoid biosynthesis	8.08566e-05	0.000245684	0	0.000274882	0
ko00950: Isoquinoline alkaloid biosynthesis	0.00111497	0.001681	0.00101682	0.00109539	0.000815081
ko00960: Tropane, piperidine and pyridine alkaloid biosynthesis	0.00535001	0.00573263	0.00448492	0.00484316	0.004732
ko00970: Aminoacyl-tRNA biosynthesis	0.0166009	0.013052	0.0167753	0.0112407	0.0196808
ko00980: Metabolism of xenobiotics by cytochrome P450	0.00301865	0.00156345	0.00301085	0.00878194	0.00305038
ko00983: Drug metabolism - other enzymes	0.0125401	0.013736	0.0126707	0.00742538	0.0131401
ko01040: Biosynthesis of unsaturated fatty acids	0.00401767	0.00270253	0.00349594	0.0080632	0.00344145
ko01053: Biosynthesis of siderophore group nonribosomal peptides	0.000168451	0.000537434	0.000474366	0.00154621	0.00080659
ko02010: ABC transporters	0.0105987	0.00363251	0.00914762	0.0105929	0.0108152
ko02020: Two-component system	0.00341908	0.00197616	0.00269566	0.00556105	0.00384759
ko02030: Bacterial chemotaxis	0.0145998	0.00179539	0.008386	0.0178824	0.00297818
ko02040: Flagellar assembly	0.00547771	0.000526466	0.0024971	0.0101351	0
ko02060: Phosphotransferase system (PTS)	0.00769982	0.000193961	0.00929667	0.00582832	0.00855835
ko03008: Ribosome biogenesis in eukaryotes	0.000470677	0.000449423	0.00048804	0.000488466	0.000818394
ko03010: Ribosome	0.0136985	0.0134444	0.0137614	0.00908092	0.0171356
ko03013: RNA transport	0.00094496	0.000539761	0.00111862	0.000529534	0.000664826
ko03018: RNA degradation	0.00490672	0.00607745	0.00466649	0.00403022	0.00570557
ko03020: RNA polymerase	0.0107054	0.0128165	0.0106028	0.00585106	0.00499011
ko03030: DNA replication	0.0103496	0.0103471	0.0114909	0.00727984	0.012012
ko03050: Proteasome	0	0	0	4.9086e-05	0
ko03060: Protein export	0.0124007	0.0128984	0.0131098	0.0095816	0.0152284
ko03070: Bacterial secretion system	0.00607226	0.00617531	0.00600475	0.00751414	0.00732471
ko03320: PPAR signaling pathway	0.00108579	0.00228135	0.000936411	0.00269272	0.00230454
ko03410: Base excision repair	0.00834235	0.00813098	0.007557	0.00734888	0.0104473
ko03420: Nucleotide excision repair	0.00689527	0.0065004	0.00701487	0.00448319	0.00752818
ko03430: Mismatch repair	0.0151003	0.0137263	0.0160797	0.0101416	0.0155988
ko03440: Homologous recombination	0.0127789	0.0125708	0.0128798	0.00871768	0.0145401
ko03450: Non-homologous end-joining	0.000264132	0.000245684	0	0.00157075	0.000258109
ko04112: Cell cycle - Caulobacter	0.0131796	0.0128984	0.0136704	0.00996447	0.0140347
ko04113: Meiosis - yeast	9.70279e-06	9.82737e-05	0	0.000227759	0.000206487
ko04115: p53 signaling pathway	9.29386e-06	4.23594e-05	0	0.000189574	0
ko04122: Sulfur relay system	0.0112758	0.00558373	0.0135488	0.0103884	0.0112629
ko04141: Protein processing in endoplasmic reticulum	0.000295302	0.000409474	0.000299995	0.000193499	0.000149628
ko04142: Lysosome	0.000135839	0.00275166	6.89987e-05	0.000149222	0.000361353
ko04146: Peroxisome	0.00137071	0.0031237	0.00134055	0.0027376	0.00302356
ko04210: Apoptosis	1.04331e-05	3.96265e-05	0	0.000228013	0.000249783
ko04614: Renin-angiotensin system	0	0	0	8.72641e-05	0
ko04621: NOD-like receptor signaling pathway	0.000731856	0.000755952	0.000769601	0.000332275	0.000397091
ko04622: RIG-I-like receptor signaling pathway	0.000165706	0	5.11102e-05	0.000101808	0.000191192
ko04626: Plant-pathogen interaction	0.00229633	0.00126352	0.00187282	0.00144734	0.00213862
ko04910: Insulin signaling pathway	0.00110435	0.000818948	0.00102614	0.000674618	0.000926545
ko04962: Vasopressin-regulated water reabsorption	2.21959e-05	0	0	9.23973e-05	0.000303658
ko04974: Protein digestion and absorption	1.50932e-05	0.000884464	0	4.71226e-05	0.000103244
ko04976: Bile secretion	5.57632e-06	0	0.000380683	6.77049e-05	8.90031e-05
ko05010: Alzheimer's disease	0.000298014	0.000263233	0.000295709	0.000532934	0.000368727
ko05012: Parkinson's disease	1.70224e-05	0	0	0.000330685	0
ko05100: Bacterial invasion of epithelial cells	0	0	0	9.51972e-05	0
ko05110: Vibrio cholerae infection	0	0	0	1.6362e-05	0
ko05111: Vibrio cholerae pathogenic cycle	0.00123723	0.00111143	0.00114998	0.00179515	0.00110618
ko05120: Epithelial cell signaling in Helicobacter pylori infection	0.00129371	0.00127229	0.00137997	0.000841475	0.000829636
ko05130: Pathogenic Escherichia coli infection	0	0	0	4.13356e-05	0
ko05131: Shigellosis	0	0	0	0.000101339	0
ko05143: African trypanosomiasis	1.19788e-05	0	0	0.000305424	0.000143394
ko05145: Toxoplasmosis	5.73451e-06	0	0	0.000116971	0
ko05146: Amoebiasis	1.24395e-05	9.4494e-05	0	0.000110758	0
ko05150: Staphylococcus aureus infection	0.00020745	3.72249e-05	8.36348e-05	0.000237993	0.00101679
ko05322: Systemic lupus erythematosus	2.34367e-06	0	0	1.70734e-05	0
