# Supplementary material for: A Modular Organization of the Human Intestinal Mucosal Microbiota and Its Association with Inflammatory Bowel Disease
Source: PubMed Central journal article supplement (PMC3834335; doi:10.1371/journal.pone.0080702), 2013-11-19
Supplement: pone.0080702.s002.pdf [file pone.0080702.s002.pdf]

Table S2. Comparison of published intestinal microbiota datasets.

| Dataset   | Platform            | Variable region | Primer set | Sample type | Subject number | Sample number | Reference |
|-----------|---------------------|-----------------|------------|-------------|----------------|---------------|-----------|
| Tong      | Illumina HiSeq 2000 | V4              | 515F/806R  | Lavage      | 64             | 179           |           |
| Frank     | Sanger              | V1-V4           | 8F/805R    | Tissue      | 124            | 190           | (24)      |
| Costello  | 454                 | V2              | 27F/338R   | Fecal       | 45             | 45            | (65)      |
| Turnbaugh | 454                 | V2              | 27F/338R   | Fecal       | 154            | 282           | (14)      |
| Caporaso  | Illumina GAIIx      | V4              | 515F/806R  | Fecal       | 2              | 466           | (11)      |
| MLI       | Illumina HiSeq 2000 | V4              | 515F/806R  | Lavage      | 148            | 285           |           |
