# Supplementary material for: A Modular Organization of the Human Intestinal Mucosal Microbiota and Its Association with Inflammatory Bowel Disease
Source: PubMed Central journal article supplement (PMC3834335; doi:10.1371/journal.pone.0080702), 2013-11-19
Supplement: pone.0080702.s003.pdf [file pone.0080702.s003.pdf]

Table S3. Sizes of FMCs in the Tong Total, Tong Overlap, Frank Total and Frank Overlap datasets.

| <b>FMCs</b>   | <b>Turquoise</b> | <b>Blue</b> | <b>Brown</b> | <b>Yellow</b> | <b>Green</b> | <b>Red</b> | <b>Pink</b> | <b>Orange</b> | <b>Black</b> |
|---------------|------------------|-------------|--------------|---------------|--------------|------------|-------------|---------------|--------------|
| Tong Total    | 167              | 62          | 15           | 14            | 5            |            |             |               |              |
| Tong Overlap  | 81               | 30          | 12           |               | 6            |            |             |               |              |
| Frank Total   | 142              | 84          |              |               |              | 14         | 12          | 8             | 3            |
| Frank Overlap | 59               | 70          |              |               |              |            |             |               |              |
