# Supplementary material for: A Modular Organization of the Human Intestinal Mucosal Microbiota and Its Association with Inflammatory Bowel Disease
Source: PubMed Central journal article supplement (PMC3834335; doi:10.1371/journal.pone.0080702), 2013-11-19
Supplement: pone.0080702.s004.pdf [file pone.0080702.s004.pdf]

Table S4. Module membership comparison between FMCs from the Tong Total and Tong Overlap dataset.

|              |                | Tong Total |            |                |           |             |
|--------------|----------------|------------|------------|----------------|-----------|-------------|
|              |                | Blue (40)  | Brown (12) | Turquoise (60) | Green (5) | Yellow (12) |
| Tong Overlap | Blue (30)      | <b>29</b>  | 1          |                |           |             |
|              | Brown (12)     | 1          | <b>11</b>  |                |           |             |
|              | Turquoise (81) | 9          |            | <b>60</b>      |           | 12          |
|              | Green (6)      | 1          |            |                | <b>5</b>  |             |
