# Supplementary material for: A Modular Organization of the Human Intestinal Mucosal Microbiota and Its Association with Inflammatory Bowel Disease
Source: PubMed Central journal article supplement (PMC3834335; doi:10.1371/journal.pone.0080702), 2013-11-19
Supplement: pone.0080702.s005.pdf [file pone.0080702.s005.pdf]

Table S5. Module membership comparison between FMCs from the Frank Total and Frank Overlap dataset.

|               |                | Frank Total    |           |         |            |           |           |
|---------------|----------------|----------------|-----------|---------|------------|-----------|-----------|
|               |                | Turquoise (52) | Blue (55) | Red (3) | Orange (7) | Black (1) | Pink (11) |
| Frank Overlap | Turquoise (59) | <b>27</b>      | 11        | 3       | 6          | 1         | 11        |
|               | Blue (70)      | 25             | <b>44</b> |         | 1          |           |           |
