# Supplementary material for: A Modular Organization of the Human Intestinal Mucosal Microbiota and Its Association with Inflammatory Bowel Disease
Source: PubMed Central journal article supplement (PMC3834335; doi:10.1371/journal.pone.0080702), 2013-11-19
Supplement: pone.0080702.s006.pdf [file pone.0080702.s006.pdf]

Table S6. Module membership comparison between FMCs from the Tong dataset and those from the Tong-MLI shared dataset.

|                  |                 | Tong Total |             |                 |           |            |
|------------------|-----------------|------------|-------------|-----------------|-----------|------------|
|                  |                 | Blue (62)  | Yellow (14) | Turquoise (137) | Green (5) | Brown (15) |
| Tong-MLI Overlap | Blue (49)       | <b>35</b>  |             |                 |           | 14         |
|                  | Yellow (18)     | 1          | <b>14</b>   | 3               |           |            |
|                  | Turquoise (161) | 26         |             | <b>134</b>      |           | 1          |
|                  | Green (5)       |            |             |                 | <b>5</b>  |            |
