# Supplementary material for: A Modular Organization of the Human Intestinal Mucosal Microbiota and Its Association with Inflammatory Bowel Disease
Source: PubMed Central journal article supplement (PMC3834335; doi:10.1371/journal.pone.0080702), 2013-11-19

Figure S2

### Generate OTU table using 16S sequencing data

Method: reference-based OTU picking against Greengenes database using uclust

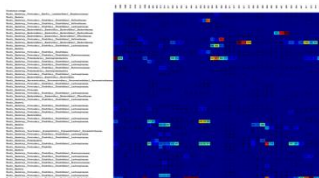

### Construct co-occurrence network

Step 1: define co-occurrence correlation using SparCC  
Step 2: calculate topological overlap matrix as distance measure

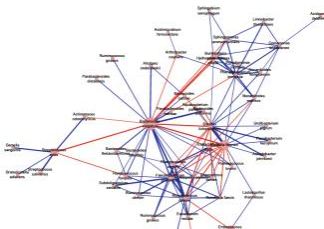

### Identify functional microbial communities (FMCs)

Method: hierarchical clustering, Dynamic Tree Cut

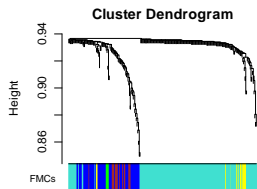

### Correlate FMCs to external information

Method: correlation between disease states, SNPs, habitats etc.

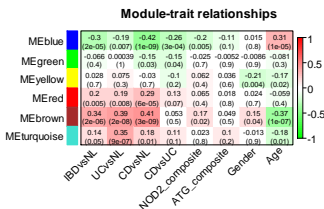

Supplement: pone.0080702.s008.pdf [file pone.0080702.s008.pdf]
