# Supplementary material for: A Modular Organization of the Human Intestinal Mucosal Microbiota and Its Association with Inflammatory Bowel Disease
Source: PubMed Central journal article supplement (PMC3834335; doi:10.1371/journal.pone.0080702), 2013-11-19

Figure S3

**A**

**Cluster Dendrogram**

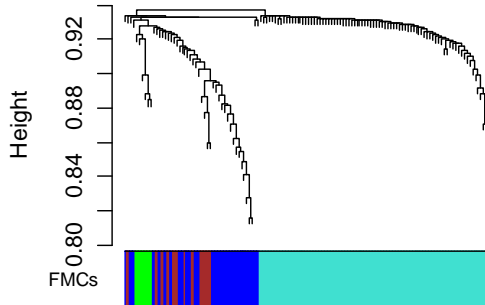

**B**

**Cluster Dendrogram**

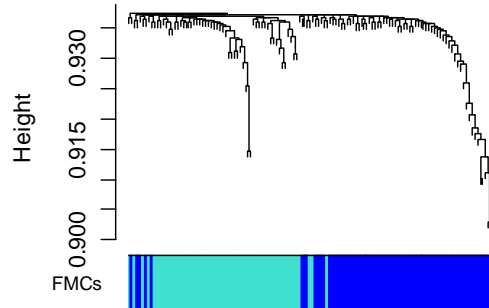

Supplement: pone.0080702.s009.pdf [file pone.0080702.s009.pdf]
